# Supplementary material
Source: PubMed Central journal article supplement (PMC5278170)
Supplement: IAI.00886-16_zii999091958s2.pdf [file IAI.00886-16_zii999091958s2.pdf]

Table S2. TYG1620 genome information with transcriptome analysis and Tn-mutants experiment.

| Locus_tag ID | gene        | Chromosome region start | Chromosome region end | Product                                                                                   | aa length | COG   | LPXTG motif (see Fig. 3) | RNA-seq (RPKM)          |                           |                      | Expression ratio |               | in mouse subcutaneous                   |                           |
|--------------|-------------|-------------------------|-----------------------|-------------------------------------------------------------------------------------------|-----------|-------|--------------------------|-------------------------|---------------------------|----------------------|------------------|---------------|-----------------------------------------|---------------------------|
|              |             |                         |                       |                                                                                           |           |       |                          | Early-log phase (RH-5h) | Stationary phase (RH-24h) | Subcutaneous abscess | Abscess / 6h     | Abscess / 24h | Number of Tn-insertion sites (in vitro) | Vivo attenuated Tn-mutant |
| SITYG_00010  | <i>dnaA</i> | 202                     | 1546                  | chromosomal replication initiator protein DnaA                                            | 447       | L     |                          | 324.1                   | 703.1                     | 597.7                |                  |               | 0                                       |                           |
| SITYG_00020  | <i>dnaN</i> | 1701                    | 2838                  | DNA polymerase III subunit beta                                                           | 378       | L     |                          | 682.2                   | 908.4                     | 547.6                |                  |               | 0                                       |                           |
| SITYG_00030  | -           | 2864                    | 3035                  | hypothetical protein                                                                      | 56        | S     |                          | 0.0                     | 0.0                       | 0.0                  |                  |               | 0                                       |                           |
| SITYG_00040  | -           | 3057                    | 3558                  | hypothetical protein                                                                      | 166       | S     |                          | 1357.9                  | 1315.8                    | 962.1                |                  |               | 0                                       |                           |
| SITYG_00050  | -           | 3703                    | 4819                  | GTP-binding protein                                                                       | 371       | J     |                          | 2698.5                  | 748.2                     | 1907.6               |                  |               | 0                                       |                           |
| SITYG_00060  | <i>pth</i>  | 4890                    | 5460                  | peptidyl-IRNA hydrolase                                                                   | 189       | J     |                          | 189.2                   | 539.7                     | 458.1                |                  |               | 0                                       |                           |
| SITYG_00070  | <i>trcF</i> | 5464                    | 8959                  | transcription-repair coupling factor                                                      | 1164      | LK    |                          | 200.6                   | 653.9                     | 324.7                |                  |               | 4                                       | vivo-attenuated           |
| SITYG_00080  | -           | 9038                    | 9305                  | hypothetical protein                                                                      | 88        | J     |                          | 1786.7                  | 411.5                     | 714.6                |                  |               | 0                                       |                           |
| SITYG_00090  | -           | 9297                    | 9665                  | septum formation initiator                                                                | 122       | D     |                          | 1090.4                  | 119.1                     | 353.8                |                  |               | 0                                       |                           |
| SITYG_00100  | -           | 9668                    | 9797                  | hypothetical protein                                                                      | 42        | D     |                          | 32.2                    | 170.3                     | 77.8                 |                  |               | 0                                       |                           |
| SITYG_00110  | -           | 9780                    | 11070                 | beta-lactamase class A                                                                    | 426       | V     |                          | 349.7                   | 411.7                     | 384.1                |                  |               | 1                                       | alive in vivo             |
| SITYG_00120  | -           | 11066                   | 12344                 | RNA(lie)-lysine synthetase                                                                | 425       | D     |                          | 1194.5                  | 636.2                     | 636.5                |                  |               | 0                                       |                           |
| SITYG_00130  | <i>hpt</i>  | 12349                   | 12892                 | hypoxanthine guanine phosphoribosyltransferase                                            | 180       | F     |                          | 3475.9                  | 728.4                     | 1941.8               |                  |               | 2                                       | vivo-attenuated           |
| SITYG_00140  | <i>ftsH</i> | 12912                   | 14883                 | cell division protein FtsH                                                                | 656       | O     |                          | 1849.9                  | 747.0                     | 1462.2               |                  |               | 1                                       | vivo-attenuated           |
| SITYG_00150  | <i>nanA</i> | 15856                   | 18619                 | putative sialidase A                                                                      | 920       | G     | LPXTG                    | 112.6                   | 620.3                     | 327.1                |                  |               | 0                                       |                           |
| SITYG_00160  | -           | 18939                   | 19413                 | competence-specific global transcription modulator                                        | 157       |       |                          | 166.3                   | 139.1                     | 614.4                | 3.2              | 3.7           | 0                                       |                           |
| SITYG_00170  | -           | 26374                   | 27181                 | putative cell shape-determining protein                                                   | 268       | M     |                          | 467.8                   | 272.3                     | 373.3                |                  |               | 0                                       |                           |
| SITYG_00180  | -           | 27182                   | 27683                 | putative cell shape-determining protein                                                   | 166       | M     |                          | 207.0                   | 219.3                     | 581.3                | 3.1              |               | 0                                       |                           |
| SITYG_00190  | -           | 27792                   | 28974                 | putative stress protein                                                                   | 393       | S     |                          | 2091.6                  | 446.2                     | 1605.7               |                  |               | 0                                       |                           |
| SITYG_00200  | -           | 29107                   | 30076                 | ribose-phosphate pyrophosphokinase                                                        | 322       | FE    |                          | 839.1                   | 703.0                     | 1254.0               |                  |               | 0                                       |                           |
| SITYG_00210  | <i>araT</i> | 30239                   | 31427                 | aromatic-amino-acid transaminase                                                          | 395       | E     |                          | 551.7                   | 332.9                     | 439.5                |                  |               | 0                                       |                           |
| SITYG_00220  | <i>recO</i> | 31404                   | 32178                 | DNA repair protein RecO                                                                   | 257       | L     |                          | 428.8                   | 425.9                     | 376.2                |                  |               | 0                                       |                           |
| SITYG_00230  | <i>plsX</i> | 32174                   | 33173                 | fatty acid/ phospholipid synthesis protein PlsX                                           | 332       | I     |                          | 822.2                   | 329.9                     | 924.8                |                  |               | 0                                       |                           |
| SITYG_00240  | -           | 33169                   | 33415                 | acyl carrier protein                                                                      | 81        | IQ    |                          | 269.8                   | 0.0                       | 285.7                |                  |               | 0                                       |                           |
| SITYG_00250  | -           | 33559                   | 34267                 | phosphoribosylaminoimidazole-succinocarboxamide synthase                                  | 235       | F     |                          | 29.3                    | 558.7                     | 383.0                | 14.2             |               | 0                                       |                           |
| SITYG_00260  | -           | 34276                   | 38002                 | putative phosphoribosylformylglycinamide synthase                                         | 1241      | F     |                          | 77.9                    | 513.1                     | 215.6                | 3.0              |               | 1                                       | alive in vivo             |
| SITYG_00270  | -           | 38023                   | 38644                 | hypothetical protein                                                                      | 206       | L     |                          | 133.6                   | 247.7                     | 194.0                |                  |               | 1                                       | alive in vivo             |
| SITYG_00280  | <i>purF</i> | 38669                   | 40109                 | amidophosphoribosyltransferase                                                            | 479       | F     |                          | 57.6                    | 335.7                     | 55.8                 |                  |               | 1                                       | alive in vivo             |
| SITYG_00290  | <i>purM</i> | 40358                   | 41378                 | phosphoribosylformylglycinamide cyclo-ligase                                              | 339       | F     |                          | 81.3                    | 710.9                     | 393.8                | 6.3              |               | 0                                       |                           |
| SITYG_00300  | <i>purH</i> | 41377                   | 41935                 | phosphoribosylglycinamide formyltransferase                                               | 185       | F     |                          | 59.5                    | 196.9                     | 287.9                | 5.3              |               | 0                                       |                           |
| SITYG_00310  | -           | 41967                   | 42867                 | DNA polymerase III alpha subunit                                                          | 299       | L     |                          | 46.1                    | 488.3                     | 234.3                | 5.5              |               | 0                                       |                           |
| SITYG_00320  | <i>purH</i> | 43202                   | 44753                 | bifunctional phosphoribosylaminoimidazolecarboxamide formyltransferase/IMP cyclohydrolase | 516       | F     |                          | 13.4                    | 212.5                     | 142.4                | 11.6             |               | 1                                       | vivo-attenuated           |
| SITYG_00330  | -           | 44804                   | 46727                 | hypothetical protein                                                                      | 640       | R     |                          | 75.5                    | 639.9                     | 339.4                | 4.8              |               | 3                                       | alive in vivo             |
| SITYG_00340  | -           | 47098                   | 47563                 | hypothetical protein                                                                      | 154       | V     |                          | 142.7                   | 141.8                     | 129.6                |                  |               | 0                                       |                           |
| SITYG_00350  | -           | 47779                   | 47974                 | hypothetical protein                                                                      | 64        | V     |                          | 21.3                    | 112.7                     | 0.0                  |                  |               | 0                                       |                           |
| SITYG_00360  | -           | 48153                   | 49419                 | hypothetical protein                                                                      | 421       | R     |                          | 920.7                   | 711.7                     | 1189.8               |                  |               | 1                                       | alive in vivo             |
| SITYG_00370  | -           | 49418                   | 50030                 | hypothetical protein                                                                      | 203       |       |                          | 826.9                   | 754.0                     | 672.7                |                  |               | 0                                       |                           |
| SITYG_00380  | <i>purD</i> | 50315                   | 51575                 | phosphoribosylamine-glycine ligase                                                        | 419       | F     |                          | 144.9                   | 366.2                     | 239.1                |                  |               | 0                                       |                           |
| SITYG_00390  | -           | 51634                   | 52816                 | hypothetical protein                                                                      | 393       | I     |                          | 228.1                   | 520.5                     | 203.9                |                  |               | 3                                       | vivo-attenuated           |
| SITYG_00400  | <i>purE</i> | 53187                   | 53625                 | phosphoribosylaminoimidazole carboxylase catalytic subunit PurE                           | 145       | F     |                          | 161.0                   | 501.7                     | 45.9                 | 3.2              | 13.1          | 1                                       | vivo-attenuated           |
| SITYG_00410  | <i>purK</i> | 53611                   | 54703                 | phosphoribosylaminoimidazole carboxylase ATPase subunit PurK                              | 363       | F     |                          | 102.6                   | 261.6                     | 312.7                | 3.3              |               | 0                                       |                           |
| SITYG_00420  | -           | 54702                   | 55365                 | hypothetical protein                                                                      | 220       |       |                          | 237.8                   | 232.0                     | 348.4                |                  |               | 0                                       |                           |
| SITYG_00430  | -           | 55380                   | 55608                 | hypothetical protein                                                                      | 75        |       |                          | 272.9                   | 867.4                     | 88.1                 |                  |               | 0                                       |                           |
| SITYG_00440  | -           | 55612                   | 55635                 | hypothetical protein                                                                      | 250       |       |                          | 319.5                   | 612.8                     | 386.7                |                  |               | 0                                       |                           |
| SITYG_00450  | -           | 56337                   | 57068                 | -                                                                                         | 57        | M     |                          | 102.4                   | 271.3                     | 261.7                |                  |               | 1                                       | alive in vivo             |
| SITYG_00460  | <i>purB</i> | 57213                   | 58520                 | adenylosuccinate lyase                                                                    | 431       | F     |                          | 227.3                   | 457.8                     | 170.5                |                  |               | 0                                       |                           |
| SITYG_00470  | -           | 58773                   | 59490                 | transcriptional regulators                                                                | 238       | K     |                          | 1000.9                  | 1134.0                    | 644.3                |                  |               | 1                                       | alive in vivo             |
| SITYG_00480  | -           | 59639                   | 61445                 | beta-galactosidase                                                                        | 601       | G     |                          | 156.2                   | 571.9                     | 417.0                |                  |               | 0                                       |                           |
| SITYG_00490  | -           | 61441                   | 61918                 | PTS system mannose-specific transporter subunit IIB                                       | 158       | G     |                          | 130.4                   | 598.9                     | 231.6                |                  |               | 0                                       |                           |
| SITYG_00500  | -           | 61936                   | 62830                 | PTS system mannose-specific transporter subunit IIC                                       | 297       | G     |                          | 41.8                    | 467.0                     | 89.9                 |                  |               | 1                                       | alive in vivo             |
| SITYG_00510  | -           | 62801                   | 63644                 | PTS system mannose-specific transporter subunit IID                                       | 280       | G     |                          | 54.1                    | 312.8                     | 214.4                | 4.3              |               | 1                                       | alive in vivo             |
| SITYG_00520  | -           | 63661                   | 64066                 | PTS system mannose-specific transporter subunit IIA                                       | 134       | G     |                          | 194.6                   | 2767.2                    | 818.2                | 4.6              | -6.7          | 0                                       |                           |
| SITYG_00530  | -           | 64134                   | 65388                 | putative galactosamine-6-phosphate isomerase                                              | 417       | M     |                          | 178.6                   | 490.7                     | 208.2                |                  |               | 2                                       | alive in vivo             |
| SITYG_00540  | <i>lacD</i> | 65398                   | 66400                 | tagatase 1,6-diphosphate aldolase                                                         | 333       | G     |                          | 161.5                   | 548.3                     | 350.8                |                  |               | 1                                       | alive in vivo             |
| SITYG_00550  | <i>galM</i> | 66442                   | 67489                 | aldose-1-epimerase                                                                        | 348       | G     |                          | 447.7                   | 566.7                     | 489.2                |                  |               | 2                                       | alive in vivo             |
| SITYG_00560  | -           | 67584                   | 68352                 | putative cell wall-binding protein                                                        | 255       | R     |                          | 394.3                   | 1831.2                    | 405.3                |                  |               | 0                                       |                           |
| SITYG_00570  | <i>rvuB</i> | 68758                   | 69757                 | holliday junction DNA helicase B                                                          | 332       | L     |                          | 224.2                   | 483.9                     | 331.7                |                  |               | 0                                       |                           |
| SITYG_00580  | -           | 69762                   | 70329                 | hypothetical protein                                                                      | 188       | S     |                          | 168.3                   | 542.6                     | 425.1                |                  |               | 0                                       |                           |
| SITYG_00590  | -           | 71003                   | 71513                 | hypothetical protein                                                                      | 169       |       |                          | 16.3                    | 172.4                     | 177.2                | 11.9             |               | 0                                       |                           |
| SITYG_00600  | -           | 71503                   | 73000                 | hypothetical protein                                                                      | 498       |       |                          | 69.3                    | 367.0                     | 167.7                |                  |               | 2                                       | alive in vivo             |
| SITYG_00610  | -           | 73110                   | 73299                 | hypothetical protein                                                                      | 62        |       |                          | 43.9                    | 232.5                     | 53.1                 |                  |               | 1                                       | alive in vivo             |
| SITYG_00620  | -           | 73301                   | 74099                 | putative D12 class N6 adenine-specific DNA methyltransferase                              | 265       | L     |                          | 57.2                    | 413.1                     | 314.6                | 6.0              |               | 5                                       | vivo-attenuated           |
| SITYG_00630  | -           | 74107                   | 75154                 | putative C-5 cytosine methyltransferase                                                   | 348       | L     |                          | 59.4                    | 440.8                     | 278.1                | 5.1              |               | 2                                       | alive in vivo             |
| SITYG_00640  | -           | 75169                   | 75721                 | putative membrane protein                                                                 | 183       |       |                          | 52.6                    | 437.9                     | 181.9                | 3.8              |               | 1                                       | alive in vivo             |
| SITYG_00650  | -           | 75717                   | 75921                 | hypothetical protein                                                                      | 617       | O     |                          | 142.3                   | 107.7                     | 147.7                |                  |               | 1                                       | alive in vivo             |
| SITYG_00660  | -           | 75936                   | 76368                 | hypothetical protein                                                                      | 143       |       |                          | 38.4                    | 254.3                     | 93.0                 |                  |               | 1                                       | alive in vivo             |
| SITYG_00670  | -           | 76354                   | 76780                 | hypothetical protein                                                                      | 141       | OC    |                          | 29.2                    | 206.3                     | 94.3                 | 3.5              |               | 0                                       |                           |
| SITYG_00680  | -           | 76772                   | 76982                 | hypothetical protein                                                                      | 69        |       |                          | 39.5                    | 104.6                     | 0.0                  |                  |               | 2                                       | alive in vivo             |
| SITYG_00690  | -           | 76978                   | 77992                 | hypothetical protein                                                                      | 337       |       |                          | 61.4                    | 260.1                     | 396.4                | 6.5              |               | 2                                       | alive in vivo             |
| SITYG_00700  | -           | 78103                   | 78937                 | putative membrane protein                                                                 | 277       |       |                          | 64.7                    | 184.4                     | 445.5                | 7.5              |               | 1                                       | alive in vivo             |
| SITYG_00710  | -           | 79098                   | 79413                 | hypothetical protein                                                                      | 104       |       |                          | 92.2                    | 209.3                     | 63.8                 |                  |               | 0                                       |                           |
| SITYG_00720  | -           | 79857                   | 80175                 | hypothetical protein                                                                      | 105       |       |                          | 13.0                    | 69.1                      | 31.6                 |                  |               | 0                                       |                           |
| SITYG_00730  | -           | 80167                   | 80500                 | hypothetical protein                                                                      | 110       | RTKL  |                          | 12.5                    | 395.9                     | 90.5                 | 7.9              | -5.3          | 0                                       |                           |
| SITYG_00740  | -           | 80515                   | 81301                 | putative endonuclease                                                                     | 261       |       |                          | 105.6                   | 866.7                     | 370.5                | 3.8              |               | 4                                       | vivo-attenuated           |
| SITYG_00750  | -           | 81322                   | 81781                 | hypothetical protein                                                                      | 152       |       |                          | 36.1                    | 191.5                     | 153.1                | 4.6              |               | 0                                       |                           |
| SITYG_00760  | -           | 81792                   | 84147                 | hypothetical protein                                                                      | 784       |       |                          | 54.6                    | 307.9                     | 200.4                | 4.0              |               | 8                                       | vivo-attenuated           |
| SITYG_00770  | -           | 84454                   | 84970                 | hypothetical protein                                                                      | 171       |       |                          | 88.4                    | 383.3                     | 155.7                |                  |               | 2                                       | alive in vivo             |
| SITYG_00780  | -           | 84996                   | 85371                 | hypothetical protein                                                                      | 124       |       |                          | 121.7                   | 468.8                     | 428.5                | 3.8              |               | 0                                       |                           |
| SITYG_00790  | -           | 85507                   | 85768                 | hypothetical protein                                                                      | 86        |       |                          | 111.3                   | 168.4                     | 0.0                  | <111.3           | <105.4        | 1                                       | alive in vivo             |
| SITYG_00800  | -           | 85788                   | 89928                 | hypothetical protein                                                                      | 1379      |       |                          | 77.2                    | 498.9                     | 254.7                |                  |               | 10                                      | vivo-attenuated           |
| SITYG_00810  | -           | 89968                   | 90039                 | hypothetical protein                                                                      | 46        |       |                          | 0.0                     | 155.8                     | 0.0                  |                  |               | 0                                       |                           |
| SITYG_00820  | -           | 90038                   | 91763                 | DNA topoisomerase                                                                         | 594       | L     |                          | 125.3                   | 513.4                     | 337.6                |                  |               | 3                                       | alive in vivo             |
| SITYG_00830  | -           | 91769                   | 93625                 | putative ATP-dependent Clp protease ATP-binding protein                                   | 611       | O     |                          | 31.6                    | 287.3                     | 229.7                | 7.9              |               | 0                                       |                           |
| SITYG_00840  | -           | 93726                   | 94073                 | hypothetical protein                                                                      | 115       |       |                          | 333.8                   | 568.3                     | 346.3                |                  |               | 1                                       | alive in vivo             |
| SITYG_00850  | -           | 94086                   | 95154                 | hypothetical protein                                                                      | 355       |       |                          | 62.1                    | 226.3                     | 150.4                |                  |               | 1                                       | vivo-attenuated           |
| SITYG_00860  | -           | 95172                   | 95949                 | putative cell wall anchor protein                                                         | 258       | LPXTG |                          | 90.8                    | 282.8                     | 103.4                |                  |               | 3                                       | alive in vivo             |
| SITYG_00870  | -           | 95974                   | 98176                 | putative glucan-binding protein                                                           | 733       | LPXTG |                          | 101.7                   | 449.1                     | 396.8                | 4.2              |               | 7                                       | vivo-attenuated           |
| SITYG_00880  | -           | 98177                   | 98800                 | putative single-stranded DNA-binding protein                                              | 140       | L     |                          | 98.1                    | 571.4                     | 403.6                | 4.5              |               | 0                                       |                           |
| SITYG_00890  | -           | 98861                   | 99125                 | hypothetical protein                                                                      | 87        |       |                          | 0.0                     | 83.2                      | 114.1                | #DIV/0!          |               | 0                                       |                           |
| SITYG_00900  | -           | 99108                   | 102258                | putative conjugal transfer protein TraG                                                   | 1049      |       |                          | 63.2                    | 334.9                     | 290.1                |                  |               | 5                                       | vivo-attenuated           |
| SITYG_00910  | -           | 102382                  | 102868                | hypothetical protein                                                                      | 161       |       |                          | 111.0                   | 361.7                     | 454.6                | 4.5              |               | 0                                       |                           |
| SITYG_00920  | -           | 102984                  | 105114                | putative membrane protein                                                                 | 709       | U     |                          | 64.3                    | 412.7                     | 424.3                | 7.2              |               | 3                                       | vivo-attenuated           |
| SITYG_00930  | -           | 105118                  | 105400                | hypothetical protein                                                                      | 93        | L     |                          | 29.4                    | 155.8                     | 142.4                | 5.3              |               | 0                                       |                           |
| SITYG_00940  | -           | 105564                  | 105873                | hypothetical protein                                                                      | 102       |       |                          | 53.7                    | 355.6                     | 292.5                | 5.9              |               | 0                                       |                           |
| SITYG_00950  | -           | 105872                  | 106523                | hypothetical protein                                                                      | 216       |       |                          | 76.5                    | 236.3                     | 46.3                 |                  |               | 2                                       | vivo-attenuated           |
| SITYG_00960  | -           | 106534                  | 108484                | hypothetical protein                                                                      | 649       |       |                          | 48.9                    | 371.9                     | 154.5                | 3.4              |               | 6                                       | alive in vivo             |
| SITYG_00970  | -           | 108495                  | 109053                | hypothetical protein                                                                      | 185       |       |                          | 96.6                    | 433.2                     | 305.9                | 3.4              |               | 1                                       |                           |

|             |      |        |        |                                                         |      |      |         |        |         |       |                 |                 |               |
|-------------|------|--------|--------|---------------------------------------------------------|------|------|---------|--------|---------|-------|-----------------|-----------------|---------------|
| SITYG_01250 | -    | 138707 | 139511 | hypothetical protein                                    | 267  | S    | 247.7   | 519.3  | 312.3   | 2     | vivo-attenuated |                 |               |
| SITYG_01260 | -    | 139510 | 139819 | hypothetical protein                                    | 102  | S    | 671.2   | 711.2  | 682.5   | 1     | alive in vivo   |                 |               |
| SITYG_01270 | -    | 139874 | 140246 | hypothetical protein                                    | 123  |      | 167.3   | 767.9  | 243.0   | 2     | vivo-attenuated |                 |               |
| SITYG_01280 | -    | 140340 | 141246 | putative membrane protein                               | 301  |      | 283.9   | 630.6  | 177.3   | 2     | alive in vivo   |                 |               |
| SITYG_01290 | -    | 141346 | 142258 | putative membrane protein                               | 303  |      | 213.8   | 746.9  | 693.7   | 0     |                 |                 |               |
| SITYG_01300 | -    | 142244 | 142544 | hypothetical protein                                    | 99   | S    | 179.8   | 659.2  | 636.0   | 0     |                 |                 |               |
| SITYG_01310 | -    | 142661 | 144059 | hypothetical protein                                    | 465  | R    | 213.6   | 455.8  | 280.1   | 1     | alive in vivo   |                 |               |
| SITYG_01320 | -    | 144055 | 144223 | hypothetical protein                                    | 55   |      | 0.0     | 130.8  | 59.8    | 0     |                 |                 |               |
| SITYG_01330 | -    | 144367 | 144757 | hypothetical protein                                    | 129  |      | 159.5   | 563.5  | 618.0   | 4.2   | 1               | alive in vivo   |               |
| SITYG_01340 | -    | 144760 | 145461 | hypothetical protein                                    | 236  |      | 70.0    | 537.2  | 144.2   | 1     | alive in vivo   |                 |               |
| SITYG_01350 | -    | 145630 | 145827 | hypothetical protein                                    | 98   | S    | 69.8    | 591.0  | 67.6    | 0     |                 |                 |               |
| SITYG_01360 | -    | 145926 | 146073 | hypothetical protein                                    | 48   |      | 112.9   | 299.0  | 0.0     | 0     |                 |                 |               |
| SITYG_01370 | -    | 146087 | 146000 | putative membrane protein                               | 170  |      | 153.6   | 299.8  | 665.6   | 4.7   | 1               | alive in vivo   |               |
| SITYG_01380 | -    | 146608 | 147241 | hypothetical protein                                    | 210  |      | 910.9   | 798.4  | 809.1   | 1     | alive in vivo   |                 |               |
| SITYG_01390 | -    | 147243 | 148065 | hypothetical protein                                    | 273  |      | 434.0   | 294.1  | 281.0   | 3     | vivo-attenuated |                 |               |
| SITYG_01400 | -    | 148064 | 148373 | hypothetical protein                                    | 102  | S    | 644.4   | 640.0  | 390.0   | 1     | alive in vivo   |                 |               |
| SITYG_01410 | -    | 148428 | 149538 | hypothetical protein                                    | 369  |      | 504.5   | 534.5  | 1004.2  | 1     | alive in vivo   |                 |               |
| SITYG_01420 | -    | 149593 | 149749 | hypothetical protein                                    | 51   |      | 26.6    | 140.9  | 0.0     | 2     | alive in vivo   |                 |               |
| SITYG_01430 | -    | 149898 | 150720 | hypothetical protein                                    | 273  |      | 141.3   | 267.3  | 73.3    | 2     | vivo-attenuated |                 |               |
| SITYG_01440 | -    | 150900 | 151221 | hypothetical protein                                    | 106  |      | 206.8   | 136.9  | 93.9    | 0     |                 |                 |               |
| SITYG_01450 | -    | 151419 | 152049 | hypothetical protein                                    | 209  |      | 52.7    | 139.5  | 79.7    | 0     |                 |                 |               |
| SITYG_01460 | -    | 152100 | 152403 | hypothetical protein                                    | 100  |      | 41.1    | 72.5   | 132.6   | 3.5   | 0               |                 |               |
| SITYG_01470 | -    | 152423 | 153218 | hypothetical protein                                    | 264  |      | 151.3   | 359.3  | 265.3   | 1     | alive in vivo   |                 |               |
| SITYG_01480 | -    | 153413 | 153605 | hypothetical protein                                    | 63   |      | 64.8    | 0.0    | 0.0     | 0     |                 |                 |               |
| SITYG_01490 | -    | 153607 | 154414 | hypothetical protein                                    | 268  |      | 257.0   | 354.0  | 398.2   | 1     | vivo-attenuated |                 |               |
| SITYG_01500 | -    | 154465 | 154771 | hypothetical protein                                    | 101  |      | 122.0   | 71.8   | 295.4   | 1     | alive in vivo   |                 |               |
| SITYG_01510 | -    | 154785 | 155601 | hypothetical protein                                    | 271  |      | 40.7    | 269.3  | 160.0   | 4.3   | 0               |                 |               |
| SITYG_01520 | -    | 155652 | 155973 | hypothetical protein                                    | 106  |      | 51.7    | 410.7  | 93.9    | 0     |                 |                 |               |
| SITYG_01530 | -    | 155981 | 156797 | hypothetical protein                                    | 271  |      | 91.5    | 188.5  | 184.6   | 2     | vivo-attenuated |                 |               |
| SITYG_01540 | -    | 157125 | 157962 | hypothetical protein                                    | 278  |      | 69.4    | 78.8   | 180.0   | 1     | alive in vivo   |                 |               |
| SITYG_01550 | -    | 158091 | 158382 | hypothetical protein                                    | 96   |      | 57.0    | 0.0    | 276.1   | 5.3   | -276.1          | 1               | alive in vivo |
| SITYG_01560 | -    | 158384 | 159209 | hypothetical protein                                    | 274  |      | 95.5    | 346.3  | 426.0   | 4.8   | 3               | vivo-attenuated |               |
| SITYG_01570 | -    | 159208 | 159517 | hypothetical protein                                    | 102  | S    | 201.4   | 497.8  | 97.5    | 1     | alive in vivo   |                 |               |
| SITYG_01580 | -    | 159691 | 162415 | type VII secretion protein EsaA                         | 907  | S    | 787.3   | 355.0  | 637.8   | 0     |                 |                 |               |
| SITYG_01590 | -    | 162411 | 162579 | hypothetical protein                                    | 55   |      | 0.0     | 130.8  | 0.0     | 0     |                 |                 |               |
| SITYG_01600 | nanE | 162736 | 163441 | N-acetylmannosamine-6-phosphate 2-epimerase             | 234  | G    | 58.8    | 436.4  | 114.0   | 0     |                 |                 |               |
| SITYG_01610 | -    | 163486 | 164812 | sugar ABC transporter sugar-binding protein             | 441  | G    | 75.1    | 580.0  | 45.4    | 0     |                 |                 |               |
| SITYG_01620 | -    | 164944 | 168811 | sugar ABC transporter permease protein                  | 288  | G    | 19.1    | 405.5  | 324.3   | 18.4  | 3               | alive in vivo   |               |
| SITYG_01630 | -    | 165827 | 166868 | sugar ABC transporter permease protein                  | 276  | G    | 69.9    | 502.4  | 338.4   | 5.3   | 0               |                 |               |
| SITYG_01640 | -    | 166671 | 167127 | hypothetical protein                                    | 151  | G    | 54.6    | 530.1  | 66.1    | 0     |                 |                 |               |
| SITYG_01650 | -    | 167151 | 167799 | hypothetical protein                                    | 215  |      | 51.2    | 847.8  | 46.5    | 1     | alive in vivo   |                 |               |
| SITYG_01660 | -    | 167824 | 168742 | N-acetylneuraminate lyase                               | 305  | EM   | 67.8    | 718.1  | 229.7   | 3.7   | -3.8            | 0               |               |
| SITYG_01670 | -    | 168759 | 169644 | putative glucokinase/N-acylmannosamine kinase           | 294  | KG   | 51.6    | 819.4  | 22.7    | 1     | vivo-attenuated |                 |               |
| SITYG_01680 | -    | 169712 | 170558 | putative phosphosugar-binding transcriptional regulator | 281  | K    | 367.7   | 493.5  | 451.1   | 0     |                 |                 |               |
| SITYG_01690 | -    | 170789 | 171945 | hypothetical protein                                    | 351  | S    | 82.5    | 437.0  | 180.7   | 1     | alive in vivo   |                 |               |
| SITYG_01700 | -    | 171628 | 173238 | hypothetical protein                                    | 469  | G    | 64.7    | 591.1  | 156.7   | 2     | vivo-attenuated |                 |               |
| SITYG_01710 | -    | 173227 | 174154 | N-acetylmuramic acid-6-phosphate etherase               | 308  | R    | 138.7   | 1517.1 | 335.8   | 0     |                 |                 |               |
| SITYG_01720 | -    | 174272 | 175097 | hypothetical protein                                    | 274  | K    | 346.9   | 799.1  | 413.9   | 0     |                 |                 |               |
| SITYG_01730 | -    | 175549 | 175873 | hypothetical protein                                    | 107  |      | 345.7   | 339.1  | 186.0   | 0     |                 |                 |               |
| SITYG_01740 | ntpI | 175862 | 177821 | V-type sodium ATPase subunit I                          | 652  | C    | 315.5   | 639.4  | 430.6   | 3     | vivo-attenuated |                 |               |
| SITYG_01750 | ntpK | 177920 | 178400 | V-type sodium ATPase subunit K                          | 159  | C    | 293.8   | 869.8  | 523.0   | 0     |                 |                 |               |
| SITYG_01760 | ntpE | 178455 | 179046 | V-type sodium ATPase subunit E                          | 196  |      | 231.6   | 483.4  | 220.9   | 0     |                 |                 |               |
| SITYG_01770 | ntpC | 179057 | 180068 | V-type sodium ATPase subunit C                          | 336  | C    | 176.4   | 282.6  | 228.5   | 1     | alive in vivo   |                 |               |
| SITYG_01780 | -    | 180057 | 180381 | V-type sodium ATPase subunit F                          | 107  | C    | 384.1   | 678.2  | 557.9   | 0     |                 |                 |               |
| SITYG_01790 | ntpA | 180393 | 182184 | V-type sodium ATPase subunit A                          | 596  | C    | 199.2   | 601.2  | 207.5   | 2     | vivo-attenuated |                 |               |
| SITYG_01800 | ntpB | 182170 | 183562 | V-type sodium ATPase subunit B                          | 463  | C    | 426.1   | 521.0  | 844.0   | 0     |                 |                 |               |
| SITYG_01810 | ntpD | 183574 | 184198 | V-type sodium ATPase subunit D                          | 207  | C    | 624.9   | 704.3  | 595.4   | 1     | alive in vivo   |                 |               |
| SITYG_01820 | thrC | 184500 | 185895 | threonine synthase                                      | 494  | E    | 296.1   | 621.5  | 324.6   | 0     |                 |                 |               |
| SITYG_01830 | -    | 186094 | 187372 | hypothetical protein                                    | 425  | V    | 126.6   | 412.7  | 220.0   | 0     |                 |                 |               |
| SITYG_01840 | -    | 187368 | 187980 | hypothetical protein                                    | 203  | R    | 325.3   | 287.3  | 278.9   | 4     |                 |                 |               |
| SITYG_01850 | -    | 188132 | 188756 | putative tetracycline transcriptional regulator         | 207  | M    | 252.6   | 352.2  | 418.4   | 4     | vivo-attenuated |                 |               |
| SITYG_01860 | -    | 188936 | 194884 | putative fibrinogen-binding protein                     | 1915 | L    | LPXTG   | 866.7  | 581.1   | 814.0 | 3               | vivo-attenuated |               |
| SITYG_01870 | -    | 190222 | 190159 | hypothetical protein                                    | 378  |      | 197.0   | 869.7  | 680.1   | 1     | alive in vivo   |                 |               |
| SITYG_01880 | ily  | 190674 | 193225 | intermediary                                            | 532  |      | 114.1   | 128.8  | 364.2   | 3.8   | -4.2            | 4               | alive in vivo |
| SITYG_01890 | -    | 196274 | 199216 | putative transcriptional regulator                      | 147  | K    | 4409.9  | 494.9  | 3324.7  | 0     |                 |                 |               |
| SITYG_01900 | adcC | 199214 | 199919 | putative zinc ABC transporter ATP-binding protein       | 234  | P    | 659.0   | 467.5  | 655.2   | 1     | alive in vivo   |                 |               |
| SITYG_01910 | adcB | 199911 | 200718 | zinc ABC transporter permease protein                   | 268  | P    | 663.1   | 680.8  | 933.3   | 0     |                 |                 |               |
| SITYG_01920 | adcA | 200727 | 202230 | zinc ABC transporter zinc-binding lipoprotein           | 500  | P    | 720.3   | 438.6  | 781.7   | 0     |                 |                 |               |
| SITYG_01930 | -    | 202497 | 202953 | putative transcriptional regulator                      | 151  | K    | 109.2   | 337.3  | 110.1   | 0     |                 |                 |               |
| SITYG_01940 | -    | 202972 | 205225 | copper-translocating P-type ATPase                      | 750  | P    | 270.7   | 1014.4 | 361.0   | 0     |                 |                 |               |
| SITYG_01950 | -    | 205237 | 205447 | hypothetical protein                                    | 69   | P    | 79.0    | 418.6  | 0.0     | 0     |                 |                 |               |
| SITYG_01960 | -    | 205487 | 206357 | putative ribosomal large subunit pseudouridine synthase | 289  | J    | 352.8   | 505.2  | 554.0   | 0     |                 |                 |               |
| SITYG_01970 | -    | 206494 | 208714 | penicillin-binding protein                              | 739  | M    | 463.4   | 544.4  | 601.6   | 0     |                 |                 |               |
| SITYG_01980 | -    | 208763 | 208916 | hypothetical protein                                    | 50   | J    | 10031.5 | 1005.4 | 10632.7 | 0     |                 |                 |               |
| SITYG_01990 | -    | 208925 | 209102 | preprotein translocase subunit SecE                     | 58   | U    | 46.9    | 372.5  | 340.4   | 7.9   | 0               |                 |               |
| SITYG_02000 | nusG | 209248 | 209785 | transcription antitermination protein NusG              | 178  | K    | 826.5   | 327.4  | 860.2   | 0     |                 |                 |               |
| SITYG_02010 | -    | 209991 | 210777 | hypothetical protein                                    | 261  |      | 285.0   | 223.7  | 319.4   | 0     |                 |                 |               |
| SITYG_02020 | rpsB | 211418 | 212201 | 30S ribosomal protein S2                                | 260  | J    | 3427.7  | 421.0  | 2270.0  | 0     |                 |                 |               |
| SITYG_02030 | tsf  | 212283 | 213327 | elongation factor Ts                                    | 347  | J    | 1430.4  | 421.0  | 1260.1  | 0     |                 |                 |               |
| SITYG_02040 | -    | 213402 | 213753 | hypothetical protein                                    | 116  |      | 212.7   | 1502.5 | 57.2    | -3.4  | -31.6           | 1               | alive in vivo |
| SITYG_02050 | ctsR | 214011 | 214473 | transcriptional regulator ctsR                          | 153  | K    | 440.0   | 523.2  | 1152.0  | 1     | alive in vivo   |                 |               |
| SITYG_02060 | cipC | 214475 | 216896 | ATP-dependent Ctp protease ATP-binding subunit          | 809  | O    | 571.9   | 913.3  | 644.7   | 0     |                 |                 |               |
| SITYG_02070 | -    | 216952 | 217393 | putative acyltransferase                                | 146  | R    | 761.9   | 1046.4 | 797.0   | 0     |                 |                 |               |
| SITYG_02080 | -    | 217465 | 218519 | dihydrodiphenyl synthase TIM barrel protein NMR3        | 351  | J    | 282.8   | 457.8  | 313.8   | 0     |                 |                 |               |
| SITYG_02090 | hslO | 218421 | 219294 | molecular chaperone Hsp33                               | 290  | O    | 346.9   | 377.6  | 920.2   | 1     | alive in vivo   |                 |               |
| SITYG_02100 | -    | 219502 | 220774 | tellurite resistance protein                            | 423  | P    | 198.9   | 639.2  | 294.2   | 1     | vivo-attenuated |                 |               |
| SITYG_02110 | -    | 220792 | 221611 | hypothetical protein                                    | 272  |      | 410.3   | 992.7  | 490.5   | 1     | alive in vivo   |                 |               |
| SITYG_02120 | -    | 221852 | 222089 | hypothetical protein                                    | 78   | ER   | 0.0     | 0.0    | 42.4    | 0     |                 |                 |               |
| SITYG_02130 | -    | 222446 | 223301 | transcriptional regulator                               | 284  | K    | 145.5   | 282.7  | 340.6   | 0     |                 |                 |               |
| SITYG_02140 | -    | 223316 | 223493 | hypothetical protein                                    | 58   |      | 23.4    | 248.3  | 0.0     | 0     |                 |                 |               |
| SITYG_02150 | -    | 223827 | 224640 | hypothetical protein                                    | 270  | R    | 96.9    | 459.5  | 197.6   | 3     | alive in vivo   |                 |               |
| SITYG_02160 | -    | 224626 | 225709 | radical SAM protein                                     | 360  | R    | 26.8    | 81.2   | 92.7    | 3.8   | 1               | alive in vivo   |               |
| SITYG_02170 | -    | 225950 | 226847 | putative ABC transporter                                | 298  | CP   | 69.4    | 343.0  | 156.7   | 1     | alive in vivo   |                 |               |
| SITYG_02180 | -    | 226870 | 227581 | putative ABC transporter                                | 236  |      | 52.5    | 401.8  | 42.4    | 2     | alive in vivo   |                 |               |
| SITYG_02190 | -    | 227573 | 228164 | putative membrane protein                               | 196  |      | 28.1    | 111.5  | 254.9   | 9.0   | 1               | alive in vivo   |               |
| SITYG_02200 | -    | 228395 | 228953 | acetyltransferase                                       | 185  |      | 171.0   | 236.3  | 234.0   | 0     |                 |                 |               |
| SITYG_02210 | -    | 229222 | 229867 | hypothetical protein                                    | 214  | M    | 90.0    | 442.9  | 280.2   | 3.4   | 1               | vivo-attenuated |               |
| SITYG_02220 | purA | 230096 | 231389 | adenylosuccinate synthetase                             | 430  | F    | 657.7   | 934.7  | 598.0   | 0     |                 |                 |               |
| SITYG_02230 | -    | 231643 | 232000 | putative restriction endonuclease                       | 118  | V    | 290.5   | 61.6   | 308.4   | 0     |                 |                 |               |
| SITYG_02240 | -    | 232011 | 232479 | RNA-specific adenosine deaminase                        | 155  | FJ   | 257.0   | 469.5  | 536.4   | 0     |                 |                 |               |
| SITYG_02250 | -    | 232475 | 233018 | hypothetical protein                                    | 180  |      | 236.8   | 809.4  | 665.8   | 3.1   | 0               |                 |               |
| SITYG_02260 | -    | 233243 | 234110 | transcriptional regulator                               | 288  | K    | 488.0   | 506.9  | 335.9   | 0     |                 |                 |               |
| SITYG_02270 | -    | 234313 | 235561 | putative transporter protein                            | 415  | GEPR | 99.7    | 616.3  | 603.5   | 6.6   | 0               |                 |               |
| SITYG_02280 | pgi  | 235799 | 237149 | glucose-6-phosphate isomerase                           | 449  | G    | 1222.9  | 781.3  | 989.3   | 1     | alive in vivo   |                 |               |
| SITYG_02290 | glpK | 237300 | 238812 | glycerol kinase                                         | 503  | C    | 161.9   | 436.0  | 318.8   | 1     | alive in vivo   |                 |               |
| SITYG_02300 | rmpA | 239068 | 239428 | ribonuclease P                                          | 119  | J    | 380.2   | 61.0   | 167.4   | 0     |                 |                 |               |
| SITYG_02310 | -    | 239411 | 240227 | putative membrane protein insertase                     | 271  | U    | 625.3   | 403.9  | 590.7   | 0     |                 |                 |               |
| SITYG_02320 | -    | 240239 | 241277 | putative RNA-binding protein                            | 345  | R    | 955.1   | 486.9  | 919.1   | 0     |                 |                 |               |
| SITYG_02330 | -    | 241332 | 241614 | hypothetical protein                                    | 93   |      | 279.5   | 467.5  | 249.3   | 0     |                 |                 |               |
| SITYG_02340 | -    | 241663 | 242296 | hypothetical protein                                    | 210  |      | 249.0   | 173.6  | 1031.2  | 4.5   | 5.0             | 0               |               |
| SITYG_02350 | rpmH | 242433 | 242568 | 50S                                                     |      |      |         |        |         |       |                 |                 |               |

|             |       |        |                                                                           |     |      |         |        |         |      |                 |
|-------------|-------|--------|---------------------------------------------------------------------------|-----|------|---------|--------|---------|------|-----------------|
| SITYG_02540 | -     | 259784 | 260015 hypothetical protein                                               | 76  | S    | 502.8   | 380.5  | 608.6   | 0    |                 |
| SITYG_02550 | -     | 260291 | 260975 glycoprotein endopeptidase                                         | 227 | O    | 315.4   | 642.5  | 381.7   | 0    |                 |
| SITYG_02560 | -     | 260971 | 261415 ribosomal protein-alanine acetyltransferase                        | 147 | R    | 364.4   | 445.4  | 588.0   | 1    | alive in vivo   |
| SITYG_02570 | gcp   | 261404 | 262415 O-sialoglycoprotein endopeptidase                                  | 336 | O    | 221.6   | 304.3  | 218.5   | 0    |                 |
| SITYG_02580 | -     | 262424 | 263120 branched-chain amino acid permease                                 | 231 | E    | 286.1   | 726.2  | 274.1   | 0    |                 |
| SITYG_02590 | -     | 263109 | 263436 hypothetical protein                                               | 108 | S    | 228.3   | 403.2  | 276.4   | 0    | vivo-attenuated |
| SITYG_02600 | -     | 263453 | 264365 putative transcriptional regulator                                 | 303 | K    | 72.8    | 409.6  | 374.4   | 5.6  | alive in vivo   |
| SITYG_02610 | -     | 264738 | 265965 hypothetical protein                                               | 408 | GEPR | 138.6   | 411.9  | 441.9   | 3.5  | vivo-attenuated |
| SITYG_02620 | -     | 266181 | 266367 hypothetical protein                                               | 61  |      | 289.9   | 236.3  | 431.9   | 0    |                 |
| SITYG_02630 | -     | 266181 | 267073 putative C-A-X amino terminal protease                             | 223 | R    | 104.9   | 327.0  | 194.3   | 2    | vivo-attenuated |
| SITYG_02640 | -     | 267166 | 267907 putative transcriptional regulator                                 | 246 | K    | 431.1   | 622.8  | 311.7   | 0    |                 |
| SITYG_02650 | -     | 267938 | 268394 MutNUDIX family protein                                            | 151 | LR   | 63.7    | 96.4   | 110.1   | 0    |                 |
| SITYG_02660 | -     | 268438 | 269614 hypothetical protein                                               | 391 | R    | 67.0    | 280.3  | 153.7   | 0    |                 |
| SITYG_02670 | -     | 269779 | 270274 hypothetical protein                                               | 164 |      | 1265.4  | 355.1  | 1541.8  | 0    |                 |
| SITYG_02680 | -     | 270286 | 271141 hypothetical protein                                               | 284 | S    | 242.6   | 334.1  | 375.8   | 2    | vivo-attenuated |
| SITYG_02690 | -     | 271137 | 272892 glycerophosphoryl diester phosphodiesterase                        | 584 | C    | 120.5   | 450.8  | 217.4   | 0    |                 |
| SITYG_02700 | -     | 272942 | 273242 hypothetical protein                                               | 99  | S    | 1106.2  | 586.0  | 1573.2  | 0    |                 |
| SITYG_02710 | -     | 273278 | 275558 x-prolyl-dipeptidyl aminopeptidase                                 | 759 |      | 407.5   | 616.8  | 665.1   | 1    | alive in vivo   |
| SITYG_02720 | -     | 275665 | 276517 glycerol uptake facilitator protein                                | 283 | G    | 462.5   | 283.7  | 424.3   | 1    | alive in vivo   |
| SITYG_02730 | -     | 276997 | 278260 hypothetical protein                                               | 420 |      | 203.6   | 609.0  | 413.4   | 0    |                 |
| SITYG_02740 | -     | 278341 | 279082 putative proteinase                                                | 246 |      | 2731.9  | 919.3  | 2154.8  | 0    |                 |
| SITYG_02750 | -     | 279078 | 280014 beta-lactamase                                                     | 311 | V    | 691.4   | 540.0  | 343.3   | 0    |                 |
| SITYG_02760 | -     | 280179 | 281058 mevalonate kinase                                                  | 292 | I    | 339.8   | 550.0  | 982.5   | 3.1  |                 |
| SITYG_02770 | mvuD  | 281039 | 281984 diphosphomevalonate decarboxylase                                  | 314 | I    | 307.3   | 534.8  | 308.2   | 0    |                 |
| SITYG_02780 | -     | 281976 | 282975 phosphomevalonate kinase                                           | 332 | I    | 431.8   | 835.9  | 733.8   | 0    |                 |
| SITYG_02790 | tni   | 282971 | 283988 isopentenyl pyrophosphate isomerase                                | 338 | C    | 575.1   | 561.8  | 454.2   | 0    |                 |
| SITYG_02800 | -     | 284016 | 285297 hydroxymethylglutaryl-CoA reductase                                | 426 | I    | 346.5   | 634.7  | 752.6   | 0    |                 |
| SITYG_02810 | mvuS  | 285298 | 286471 hydroxymethylglutaryl-CoA synthase                                 | 126 | I    | 169.7   | 167.3  | 137.0   | 0    |                 |
| SITYG_02820 | -     | 286603 | 287053 hypothetical protein                                               | 149 | S    | 63.0    | 341.8  | 44.6    | 0    |                 |
| SITYG_02830 | -     | 287056 | 287830 hypothetical protein                                               | 257 | S    | 428.8   | 624.6  | 246.5   | 0    |                 |
| SITYG_02840 | -     | 287933 | 290240 pyruvate formate-lyase                                             | 771 | C    | 1056.7  | 2272.2 | 854.2   | 0    |                 |
| SITYG_02850 | -     | 290477 | 291137 hypothetical protein                                               | 219 |      | 345.7   | 432.8  | 1156.3  | 2.6  |                 |
| SITYG_02860 | dinP  | 291155 | 292220 DNA polymerase IV                                                  | 354 | L    | 307.7   | 474.6  | 631.7   | 2    | vivo-attenuated |
| SITYG_02870 | -     | 292430 | 294785 exodeoxyribonuclease V alpha chain                                 | 784 | L    | 246.6   | 597.2  | 315.5   | 0    |                 |
| SITYG_02880 | -     | 296010 | 295625 signal peptidase I                                                 | 204 | U    | 215.8   | 536.0  | 195.9   | 0    |                 |
| SITYG_02890 | rmhC  | 296628 | 296519 ribonuclease HIII                                                  | 296 | L    | 162.9   | 172.6  | 101.4   | 2    | vivo-attenuated |
| SITYG_02900 | -     | 296604 | 296910 hypothetical protein                                               | 101 |      | 3158.6  | 502.7  | 1673.7  | 0    |                 |
| SITYG_02910 | -     | 296906 | 297455 colicin V production protein                                       | 182 | R    | 309.8   | 520.3  | 219.5   | 0    |                 |
| SITYG_02920 | mutS2 | 297514 | 298848 DNA mismatch repair protein                                        | 777 | L    | 247.0   | 348.4  | 469.0   | 0    |                 |
| SITYG_02930 | pepD  | 299909 | 301331 dipeptidase A                                                      | 473 | E    | 242.1   | 309.1  | 254.2   | 0    |                 |
| SITYG_02940 | trx   | 301435 | 301750 thioredoxin                                                        | 104 | OC   | 2910.3  | 558.1  | 1657.7  | 0    |                 |
| SITYG_02950 | -     | 302018 | 303458 putative amino acid transporters                                   | 479 | E    | 123.9   | 1724.4 | 174.3   | 0    |                 |
| SITYG_02960 | -     | 303605 | 304460 small-conductance mechanosensitive channel                         | 284 | M    | 242.6   | 436.9  | 176.2   | 0    |                 |
| SITYG_02970 | -     | 304834 | 305737 putative Zn-dependent protease                                     | 300 | O    | 68.9    | 340.7  | 422.6   | 6.7  |                 |
| SITYG_02980 | -     | 305799 | 306168 hypothetical protein                                               | 122 |      | 123.7   | 178.7  | 136.1   | 0    |                 |
| SITYG_02990 | gdhA  | 306224 | 307571 glutamate dehydrogenase                                            | 448 | E    | 194.0   | 407.8  | 201.3   | 2    | vivo-attenuated |
| SITYG_03000 | -     | 307997 | 308843 dihydroxycarboxylate dehydrogenase                                 | 311 | F    | 217.2   | 399.1  | 450.6   | 0    | vivo-attenuated |
| SITYG_03010 | -     | 308660 | 308696 peptide methionine sulfoxide reductase                             | 311 | O    | 709.1   | 563.5  | 729.5   | 0    |                 |
| SITYG_03020 | -     | 310191 | 311460 chlorohydrolase                                                    | 422 | FR   | 758.4   | 710.0  | 553.9   | 4    | vivo-attenuated |
| SITYG_03030 | -     | 311705 | 311924 putative ABC transporter                                           | 72  | V    | 18.9    | 802.7  | 137.6   | 7.8  | -7.0            |
| SITYG_03040 | -     | 312196 | 313375 ROK family protein                                                 | 392 | KG   | 246.3   | 521.9  | 468.5   | 0    |                 |
| SITYG_03050 | -     | 313547 | 314813 PTS system cellobiose-specific transporter subunit IIC             | 421 | G    | 140.9   | 451.3  | 55.5    | 0    |                 |
| SITYG_03060 | -     | 314825 | 315722 hypothetical protein                                               | 298 |      | 87.9    | 759.4  | 67.2    | 0    |                 |
| SITYG_03070 | -     | 315736 | 317434 hypothetical protein                                               | 565 | G    | 149.0   | 517.7  | 260.2   | 1    | alive in vivo   |
| SITYG_03080 | -     | 317450 | 317771 PTS system cellobiose-specific transporter subunit IIB             | 106 | G    | 1925.5  | 3149.0 | 1188.8  | 1    | alive in vivo   |
| SITYG_03090 | -     | 317780 | 318098 PTS system lactose/cellobiose-specific transporter subunit IIA     | 105 | G    | 574.0   | 552.8  | 600.0   | 0    |                 |
| SITYG_03100 | -     | 318311 | 318881 putative TetR family transcriptional regulator                     | 189 | K    | 414.8   | 385.5  | 229.0   | 1    | alive in vivo   |
| SITYG_03110 | -     | 318943 | 320296 multi antimicrobial extrusion protein                              | 450 | V    | 153.3   | 341.1  | 207.8   | 0    |                 |
| SITYG_03120 | -     | 320878 | 321388 hypothetical protein                                               | 169 |      | 235.9   | 474.0  | 452.9   | 0    |                 |
| SITYG_03130 | -     | 321402 | 322272 putative AraC family transcriptional regulator                     | 289 | K    | 238.4   | 530.4  | 588.7   | 0    |                 |
| SITYG_03140 | -     | 322383 | 323823 6-phospho-beta-glucosidase                                         | 479 | G    | 328.4   | 549.4  | 265.0   | 0    |                 |
| SITYG_03150 | -     | 323812 | 323947 hypothetical protein                                               | 44  |      | 553.1   | 325.6  | 148.8   | -3.4 |                 |
| SITYG_03160 | -     | 323969 | 324194 glyoxalase family protein                                          | 74  | E    | 0.0     | 97.7   | 0.0     | 0    |                 |
| SITYG_03170 | -     | 324472 | 325074 hypothetical protein                                               | 383 | E    | 54.0    | 286.1  | 313.8   | 6.3  | alive in vivo   |
| SITYG_03180 | -     | 325837 | 326572 histidinol-phosphatase                                             | 244 | ER   | 163.7   | 597.9  | 286.9   | 0    |                 |
| SITYG_03190 | -     | 326571 | 327951 putative endonuclease                                              | 459 | V    | 162.3   | 748.4  | 465.7   | 3.1  |                 |
| SITYG_03200 | -     | 327937 | 329275 hypothetical protein                                               | 445 | V    | 241.8   | 837.6  | 487.8   | 1    | alive in vivo   |
| SITYG_03210 | -     | 329271 | 329814 putative acetyltransferase                                         | 180 | R    | 282.7   | 526.1  | 240.4   | 0    |                 |
| SITYG_03220 | -     | 329934 | 330327 glucosidase                                                        | 130 | G    | 137.2   | 279.6  | 51.1    | 0    |                 |
| SITYG_03230 | -     | 330363 | 330495 glucosidase                                                        | 43  | G    | 94.3    | 332.9  | 0.0     | 1    | alive in vivo   |
| SITYG_03240 | -     | 330837 | 331515 putative response regulator                                        | 225 | TK   | 232.5   | 615.8  | 474.0   | 0    |                 |
| SITYG_03250 | -     | 331517 | 332384 histidine kinase A                                                 | 288 | T    | 196.2   | 278.8  | 498.0   | 0    |                 |
| SITYG_03260 | -     | 332709 | 333468 ABC-2 family transporter protein                                   | 252 |      | 142.1   | 665.9  | 370.5   | 0    |                 |
| SITYG_03270 | -     | 334811 | 334390 ABC transporter ATP-binding protein                                | 302 | V    | 36.5    | 531.8  | 209.9   | 6.3  | -3.9            |
| SITYG_03280 | -     | 334613 | 336221 glucan 1,6-alpha-glucosidase                                       | 535 | G    | 332.8   | 519.3  | 324.7   | 0    |                 |
| SITYG_03290 | -     | 336289 | 336943 hypothetical protein                                               | 217 |      | 69.8    | 470.4  | 92.1    | 0    |                 |
| SITYG_03300 | -     | 336939 | 338274 hypothetical protein                                               | 444 | P    | 87.0    | 609.0  | 270.8   | 3.4  | alive in vivo   |
| SITYG_03310 | -     | 338275 | 338836 ABC transporter permease                                           | 186 | S    | 66.5    | 352.5  | 125.3   | 0    |                 |
| SITYG_03320 | -     | 339260 | 341513 5-methyltetrahydropteroyltryptophan-homocysteine methyltransferase | 750 | E    | 46.0    | 360.9  | 200.6   | 4.7  |                 |
| SITYG_03330 | -     | 341959 | 343105 hypothetical protein                                               | 381 | I    | 709.5   | 1323.1 | 701.0   | 0    |                 |
| SITYG_03340 | -     | 343133 | 343943 GDP-diacylglycerol diphosphatase                                   | 269 | I    | 788.7   | 1139.4 | 582.7   | 0    |                 |
| SITYG_03350 | -     | 344448 | 344448 hypothetical protein                                               | 171 | OC   | 747.6   | 1703.5 | 642.2   | 0    |                 |
| SITYG_03360 | -     | 344631 | 344850 hypothetical protein                                               | 72  | R    | 37.9    | 301.0  | 0.0     | 0    |                 |
| SITYG_03370 | -     | 345099 | 345528 hypothetical protein                                               | 142 |      | 29.0    | 358.6  | 140.4   | 5.3  | -2.1            |
| SITYG_03380 | -     | 345502 | 346408 hypothetical protein                                               | 301 | G    | 105.3   | 509.3  | 166.3   | 1    | alive in vivo   |
| SITYG_03390 | -     | 346404 | 347448 glyoxyltransferase                                                 | 347 | M    | 75.5    | 378.9  | 192.4   | 0    |                 |
| SITYG_03400 | rpsF  | 347724 | 348015 30S ribosomal protein S6                                           | 96  | J    | 4533.1  | 302.1  | 2588.1  | 0    |                 |
| SITYG_03410 | -     | 348026 | 348497 single-strand binding protein                                      | 156 | L    | 2448.4  | 279.9  | 1556.4  | 0    |                 |
| SITYG_03420 | rpsR  | 348533 | 348773 30S ribosomal protein S18                                          | 79  | J    | 172.8   | 457.8  | 83.7    | 0    |                 |
| SITYG_03430 | -     | 349181 | 349691 acetyltransferase                                                  | 169 | KR   | 667.0   | 517.1  | 886.1   | 0    |                 |
| SITYG_03440 | -     | 349842 | 350520 hypothetical protein                                               | 225 | S    | 354.9   | 324.1  | 518.4   | 0    |                 |
| SITYG_03450 | -     | 350535 | 351480 magnesium and cobalt transporter                                   | 314 | P    | 623.3   | 255.8  | 595.1   | 0    |                 |
| SITYG_03460 | uvrA  | 351593 | 354428 excinuclease ATPase subunitA                                       | 944 | L    | 471.2   | 550.3  | 644.7   | 2    | vivo-attenuated |
| SITYG_03470 | -     | 354465 | 355221 hypothetical protein                                               | 251 |      | 268.9   | 436.0  | 411.8   | 0    |                 |
| SITYG_03480 | pepP  | 355368 | 356430 aminopeptidase P                                                   | 353 | E    | 273.4   | 351.8  | 463.3   | 1    | alive in vivo   |
| SITYG_03490 | efp   | 356488 | 357049 elongation factor P                                                | 186 | J    | 2735.9  | 548.4  | 1485.7  | 0    |                 |
| SITYG_03500 | -     | 357158 | 357548 hypothetical protein                                               | 129 | S    | 1212.5  | 338.1  | 618.0   | 0    |                 |
| SITYG_03510 | nusB  | 357525 | 357966 nitrogen utilization substance protein NusB                        | 146 | K    | 677.3   | 99.7   | 523.7   | 0    |                 |
| SITYG_03520 | -     | 357977 | 358481 competence-specific sigma factor                                   | 167 |      | 82.3    | 741.2  | 557.9   | 7.4  |                 |
| SITYG_03530 | lysC  | 364140 | 365490 aspartate kinase                                                   | 449 | E    | 218.2   | 390.7  | 275.2   | 1    | alive in vivo   |
| SITYG_03540 | phsB  | 365656 | 366446 enoyl-CoA hydratase                                                | 263 | I    | 996.1   | 388.4  | 1128.5  | 0    |                 |
| SITYG_03550 | -     | 366538 | 366973 putative transcriptional regulator                                 | 144 | K    | 2937.1  | 404.1  | 1893.0  | 0    |                 |
| SITYG_03560 | fabH  | 366972 | 367947 3-oxoacyl-(acyl-carrier-protein) synthase III                      | 324 | I    | 1280.6  | 608.5  | 1534.6  | 1    | vivo-attenuated |
| SITYG_03570 | -     | 368000 | 368225 acyl carrier protein                                               | 74  | IQ   | 81654.5 | 2344.0 | 79487.8 | 0    |                 |
| SITYG_03580 | fabK  | 368490 | 369465 enoyl-acyl carrier protein reductase                               | 324 | R    | 1178.5  | 405.7  | 1184.4  | 0    |                 |
| SITYG_03590 | fabD  | 369457 | 370396 malonyl-CoA-acyl carrier protein transacylase                      | 312 | I    | 455.0   | 421.2  | 759.3   | 0    |                 |
| SITYG_03600 | fabG  | 370385 | 371117 3-ketoacyl-(acyl carrier protein) reductase                        | 243 | IOR  | 923.7   | 420.3  | 699.6   | 0    |                 |
| SITYG_03610 | fabF  | 371197 | 372430 3-oxoacyl-(acyl carrier protein) synthase                          | 410 | IQ   | 360.0   | 338.6  | 390.9   | 0    |                 |
| SITYG_03620 | accB  | 372430 | 372910 acetyl-CoA carboxylase                                             | 159 | I    | 164.2   | 137.3  | 104.6   | 0    |                 |
| SITYG_03630 | fabZ  | 372906 | 373329 (3R)-hydroxymyristoyl-(acyl carrier protein) dehydratase           | 140 | I    | 627.6   | 467.5  | 308.6   | 0    |                 |
| SITYG_03640 | accC  | 373344 | 374712 biotin carboxylase                                                 | 455 | I    | 600.4   | 562.2  | 778.1   | 0    |                 |
| SITYG_03650 | accD  | 374731 | 375595 acetyl CoA carboxylase carboxyltransferase subunit beta            | 287 | I    | 638.5   | 406.9  | 836.8   | 0    |                 |
| SITYG_03660 | accA  | 375591 | 376362 acetyl CoA carboxylase subunit alpha                               | 256 | I    | 2270.5  | 1111.6 | 1966.7  | 0    |                 |
| SITYG_03670 | dedA  | 376697 | 377375 DedA protein                                                       | 219 | S    | 226.3   | 399.5  | 334.7   | 1    | alive in vivo   |
| SITYG_03680 | serS  | 377397 | 378675 seryl-tRNA synthetase                                              | 425 | J    | 366.8   | 601.8  | 550.0   | 0    |                 |
| SITYG_03690 | -     | 378887 | 379259 hypothetical protein                                               | 123 | S    | 412.6   | 236.3  | 243.0   | 0    |                 |
| SITYG_03700 |       |        |                                                                           |     |      |         |        |         |      |                 |

|             |              |        |                                                             |      |      |        |        |        |      |                 |
|-------------|--------------|--------|-------------------------------------------------------------|------|------|--------|--------|--------|------|-----------------|
| SITYG_03830 | -            | 390826 | 391873 ABC transporter permease                             | 348  | U    | 277.3  | 713.6  | 354.9  | 0    |                 |
| SITYG_03840 | -            | 391923 | 392721 hypothetical protein                                 | 265  | M    | 1200.8 | 660.9  | 767.6  | 0    |                 |
| SITYG_03850 | -            | 392717 | 393353 tRNA [guanine-N (7)-] methyltransferase              | 211  | R    | 1213.1 | 552.8  | 963.1  | 1    | vivo-attenuated |
| SITYG_03860 | -            | 393750 | 394452 hypothetical protein                                 | 230  | S    | 389.1  | 475.6  | 594.1  | 2    | vivo-attenuated |
| SITYG_03870 | -            | 394663 | 395152 ribosome maturation protein RimpP                    | 162  | S    | 856.8  | 629.1  | 1006.3 | 0    |                 |
| SITYG_03880 | <i>nusA</i>  | 395203 | 396397 transcription termination factor NusA                | 397  | K    | 434.3  | 773.0  | 395.3  | 0    |                 |
| SITYG_03890 | -            | 396407 | 396704 hypothetical protein                                 | 98   | K    | 363.1  | 296.0  | 371.9  | 0    |                 |
| SITYG_03900 | -            | 396696 | 396996 ribosomal protein L7A family protein                 | 99   | J    | 705.2  | 366.2  | 702.9  | 0    |                 |
| SITYG_03910 | <i>rnfB</i>  | 397012 | 398950 translation initiation factor IF-2                   | 945  | J    | 575.9  | 464.6  | 594.5  | 0    |                 |
| SITYG_03920 | <i>rbsA</i>  | 398293 | 403270 ribosome-binding factor A                            | 116  | J    | 119.2  | 62.6   | 93.0   | 0    | 0.0             |
| SITYG_03930 | -            | 400437 | 402069 hypothetical protein                                 | 543  | P    | 998.9  | 727.1  | 910.7  | 1    | alive in vivo   |
| SITYG_03940 | -            | 402260 | 403412 N-acetylglucosamine-6-phosphate deacetylase          | 383  | G    | 237.7  | 496.0  | 374.8  | 0    |                 |
| SITYG_03950 | -            | 403987 | 408151 putative serine protease                             | 1487 | O    | 74.3   | 502.1  | 155.2  | 5    | vivo-attenuated |
| SITYG_03960 | -            | 408406 | 408559 hypothetical protein                                 | 50   |      | 27.1   | 430.9  | 0.0    | 0    |                 |
| SITYG_03970 | -            | 408696 | 409113 hypothetical protein                                 | 138  |      | 179.1  | 263.5  | 602.0  | 2.7  | 0               |
| SITYG_03980 | -            | 409109 | 409568 transcriptional regulator                            | 152  | K    | 72.3   | 335.1  | 350.0  | 5.3  | 0               |
| SITYG_03990 | -            | 409560 | 409971 hypothetical protein                                 | 136  |      | 70.7   | 213.9  | 146.6  | 0    | 0               |
| SITYG_04000 | <i>glyQ</i>  | 410248 | 411163 glycyl-HRNA synthetase subunit alpha                 | 304  | J    | 389.9  | 360.2  | 406.1  | 0    | 0               |
| SITYG_04010 | <i>glyS</i>  | 411165 | 413205 glycyl-HRNA synthetase subunit beta                  | 679  | J    | 862.2  | 624.8  | 536.6  | 0    | 0               |
| SITYG_04020 | -            | 413220 | 413478 hypothetical protein                                 | 85   | S    | 852.1  | 425.9  | 1012.0 | 0    | 0               |
| SITYG_04030 | -            | 413529 | 414195 Trk system potassium uptake protein TrkA             | 221  | P    | 859.5  | 593.9  | 738.8  | 0    | 0               |
| SITYG_04040 | -            | 414205 | 415561 potassium uptake protein TrkH                        | 451  | P    | 569.0  | 583.4  | 518.4  | 0    | 0               |
| SITYG_04050 | -            | 415639 | 415807 hypothetical protein                                 | 55   |      | 74.1   | 130.8  | 836.8  | 12.3 | 5.3             |
| SITYG_04060 | -            | 415827 | 416025 putative transcriptional regulator                   | 65   | K    | 125.7  | 0.0    | 50.7   | 0    | 0               |
| SITYG_04070 | <i>mraW</i>  | 416173 | 417124 S-adenosyl-methyltransferase mraW                    | 316  | M    | 1487.4 | 462.1  | 802.5  | 0    | 0               |
| SITYG_04080 | -            | 417132 | 417450 Cell division protein FtsL                           | 105  | D    | 1239.2 | 414.6  | 1073.7 | 0    | 0               |
| SITYG_04090 | -            | 417453 | 419712 penicillin-binding protein 2X                        | 752  | M    | 653.7  | 593.4  | 875.7  | 0    | 0               |
| SITYG_04100 | <i>mraY</i>  | 419713 | 420697 Phospho-N-acetylmuramoyl-pentapeptide- transferase   | 327  | M    | 737.7  | 558.3  | 489.9  | 0    | 0               |
| SITYG_04110 | -            | 421098 | 423057 putative extracellular solute-binding protein        | 652  | E    | 759.8  | 493.6  | 671.5  | 1    | alive in vivo   |
| SITYG_04120 | -            | 423413 | 423911 CTP synthase                                         | 165  | F    | 866.3  | 706.0  | 887.2  | 0    | 0               |
| SITYG_04130 | -            | 423961 | 424372 hypothetical protein                                 | 136  | S    | 1453.4 | 267.3  | 952.9  | 0    | 0               |
| SITYG_04140 | -            | 424784 | 425666 fructose biphosphate aldolase                        | 293  | G    | 3155.8 | 2690.8 | 2539.0 | 0    | 0               |
| SITYG_04150 | -            | 426104 | 426551 LytR/AlgR family transcriptional regulator           | 148  | KT   | 306.2  | 295.0  | 269.6  | 0    | 0               |
| SITYG_04160 | -            | 426556 | 427219 hypothetical protein                                 | 220  |      | 519.3  | 265.2  | 242.3  | 0    | 0               |
| SITYG_04170 | <i>rpmB</i>  | 427353 | 427542 50S ribosomal protein L28                            | 62   | J    | 4148.2 | 348.8  | 3187.9 | 0    | 0               |
| SITYG_04180 | -            | 427716 | 428082 alkaline-shock protein                               | 121  | S    | 2436.8 | 420.3  | 2167.5 | 0    | 0               |
| SITYG_04190 | -            | 428084 | 429752 hypothetical protein                                 | 555  | R    | 1238.5 | 606.0  | 1149.9 | 0    | 0               |
| SITYG_04200 | -            | 430143 | 431019 ABC transporter, ATP-binding protein                 | 291  | V    | 104.2  | 351.2  | 332.4  | 3.5  | 4               |
| SITYG_04210 | -            | 431029 | 431764 putative kinase                                      | 244  | V    | 79.0   | 478.4  | 259.6  | 3.6  | 0               |
| SITYG_04220 | -            | 431768 | 432869 histidine kinase                                     | 366  | T    | 165.8  | 359.3  | 209.8  | 1    | vivo-attenuated |
| SITYG_04230 | -            | 432865 | 433465 two-component system transcriptional regulator       | 199  | TK   | 269.6  | 512.7  | 485.4  | 0    | 0               |
| SITYG_04240 | -            | 433594 | 434482 hypothetical protein                                 | 295  | O    | 733.4  | 866.1  | 497.6  | 0    | 0               |
| SITYG_04250 | -            | 434590 | 434806 hypothetical protein                                 | 71   |      | 96.0   | 203.5  | 186.0  | 0    | 0               |
| SITYG_04260 | -            | 435172 | 435913 amino acid transport ATP-binding protein             | 246  | E    | 375.1  | 563.5  | 230.4  | 1    | alive in vivo   |
| SITYG_04270 | -            | 435909 | 437475 glutamine ABC transporter substrate-binding protein  | 521  | ET   | 389.4  | 364.8  | 371.9  | 1    | alive in vivo   |
| SITYG_04280 | -            | 437600 | 439469 hypothetical protein                                 | 629  |      | 338.0  | 465.1  | 632.3  | 1    | alive in vivo   |
| SITYG_04290 | <i>bacA</i>  | 439566 | 440390 undecaprynyl diphosphatase                           | 280  | V    | 536.8  | 573.5  | 440.8  | 0    | 0               |
| SITYG_04300 | -            | 440267 | 440498 hypothetical protein                                 | 42   |      | 32.2   | 170.3  | 1556.9 | 62.7 | 7.6             |
| SITYG_04310 | <i>mecA</i>  | 440525 | 441276 negative regulator of genetic competence MecA        | 249  | OTN  | 1393.8 | 468.8  | 1472.8 | 0    | 0               |
| SITYG_04320 | <i>rgpG</i>  | 441271 | 442438 putative glycosyl transferase                        | 388  | M    | 1105.5 | 753.2  | 851.9  | 2    | vivo-attenuated |
| SITYG_04330 | -            | 442528 | 443299 FeS assembly ATPase SufC                             | 256  | O    | 672.5  | 370.5  | 1250.4 | 0    | 0               |
| SITYG_04340 | -            | 443338 | 444601 FeS assembly protein SufD                            | 420  | O    | 443.4  | 591.6  | 787.1  | 0    | 0               |
| SITYG_04350 | -            | 444617 | 445850 cysteine desulfurase, SufS subfamily                 | 410  | E    | 249.0  | 427.7  | 57.0   | 4.9  | 9.0             |
| SITYG_04360 | -            | 445836 | 446286 SUF system FeS assembly protein, NifU family         | 149  | C    | 101.4  | 293.0  | 267.8  | 0    | 0               |
| SITYG_04370 | -            | 446373 | 447615 D-alanyl-D-alanine carboxypeptidase                  | 413  | M    | 230.5  | 460.0  | 202.1  | 1    | alive in vivo   |
| SITYG_04380 | -            | 447771 | 449115 ATP-dependent RNA helicase                           | 447  | LKJ  | 450.6  | 245.3  | 291.4  | 1    | vivo-attenuated |
| SITYG_04390 | -            | 449275 | 450085 amino acid ABC transporter permease                  | 269  | E    | 394.3  | 488.3  | 557.9  | 2    | alive in vivo   |
| SITYG_04400 | -            | 450084 | 450828 amino acid ABC transporter ATP-binding protein       | 247  | E    | 384.7  | 827.0  | 499.4  | 1    | alive in vivo   |
| SITYG_04410 | -            | 450922 | 451147 hypothetical protein                                 | 74   |      | 1567.1 | 586.0  | 490.9  | 0    | 0               |
| SITYG_04420 | <i>trxB</i>  | 451209 | 452121 thioredoxin reductase                                | 303  | O    | 732.3  | 385.5  | 924.9  | 0    | 0               |
| SITYG_04430 | -            | 452299 | 453676 amino acid permease                                  | 458  | E    | 295.2  | 367.0  | 401.1  | 0    | 0               |
| SITYG_04440 | -            | 453863 | 454208 hypothetical protein                                 | 114  |      | 120.2  | 764.3  | 640.4  | 5.8  | 0               |
| SITYG_04450 | -            | 454207 | 454690 hypothetical protein                                 | 160  |      | 51.5   | 455.0  | 228.7  | 4.8  | 0               |
| SITYG_04460 | -            | 454762 | 455253 nicotinate adenophosphotransferase                   | 496  | H    | 895.9  | 481.3  | 762.9  | 0    | 0               |
| SITYG_04470 | <i>nsdE</i>  | 455249 | 457074 NAD synthetase                                       | 274  | H    | 598.3  | 319.6  | 486.9  | 0    | 0               |
| SITYG_04480 | <i>pepC</i>  | 457221 | 458559 aminopeptidase C                                     | 445  | E    | 781.3  | 344.9  | 555.4  | 1    | alive in vivo   |
| SITYG_04490 | <i>pfp1a</i> | 458728 | 460900 penicillin-binding protein 1A                        | 723  | M    | 420.2  | 404.7  | 508.6  | 1    | alive in vivo   |
| SITYG_04500 | <i>recU</i>  | 460892 | 461495 holliday junction resolvase RecU                     | 200  | R    | 350.8  | 145.8  | 682.8  | 0    | 0               |
| SITYG_04510 | -            | 461575 | 462085 hypothetical protein                                 | 169  | S    | 97.6   | 215.4  | 196.9  | 0    | 0               |
| SITYG_04520 | -            | 462160 | 462502 cell division initiation protein                     | 113  | D    | 933.9  | 192.8  | 880.9  | 0    | 0               |
| SITYG_04530 | -            | 462563 | 462668 hypothetical protein                                 | 34   |      | 3871.6 | 6278.5 | 2295.3 | 0    | 0               |
| SITYG_04540 | -            | 462711 | 462801 hypothetical protein                                 | 29   |      | 92.2   | 0.0    | 111.6  | 0    | 0               |
| SITYG_04550 | -            | 462939 | 464094 predicted N6-adenine-specific DNA methylase          | 384  | L    | 535.1  | 494.7  | 417.3  | 3    | alive in vivo   |
| SITYG_04560 | -            | 464106 | 465549 hypothetical protein                                 | 180  | O    | 457.1  | 380.7  | 487.1  | 2    | alive in vivo   |
| SITYG_04570 | <i>ahpC</i>  | 465652 | 466219 alkyl hydroperoxidase                                | 188  | O    | 1565.6 | 1162.7 | 1257.5 | 0    | 0               |
| SITYG_04580 | -            | 466230 | 467763 NADH oxidase                                         | 510  | O    | 990.4  | 759.7  | 648.5  | 0    | 0               |
| SITYG_04590 | <i>luxS</i>  | 467812 | 468295 S-ribosylhomocysteine lyase                          | 160  | T    | 249.1  | 364.0  | 665.3  | 0    | 0               |
| SITYG_04600 | -            | 468510 | 470118 hypothetical protein                                 | 535  | R    | 2324.3 | 451.0  | 1536.3 | 2    | alive in vivo   |
| SITYG_04610 | <i>gmk</i>   | 470299 | 470926 guanylate kinase                                     | 208  | F    | 1541.5 | 665.9  | 1665.7 | 0    | 0               |
| SITYG_04620 | <i>rhoZ</i>  | 470954 | 471266 DNA-directed RNA polymerase subunit omega            | 103  | K    | 2433.1 | 422.6  | 1899.0 | 0    | 0               |
| SITYG_04630 | <i>prfA</i>  | 471324 | 472706 primosomal protein N                                 | 793  | L    | 247.3  | 496.2  | 366.8  | 0    | 0               |
| SITYG_04640 | <i>fmt</i>   | 471702 | metilmethyl-RNA formyltransferase                           | 311  | J    | 525.2  | 228.7  | 472.1  | 0    | 0               |
| SITYG_04650 | -            | 474691 | 476006 ribosomal RNA small subunit methyltransferase B      | 437  | J    | 350.4  | 551.9  | 397.4  | 0    | 0               |
| SITYG_04660 | <i>pfpL</i>  | 476023 | 476784 phosphoprotein phosphatase                           | 246  | T    | 1125.2 | 741.4  | 975.7  | 1    | vivo-attenuated |
| SITYG_04670 | <i>pkn_1</i> | 476760 | 478635 putative serine/threonine protein kinase             | 624  | RTKL | 867.2  | 586.0  | 551.6  | 0    | 0               |
| SITYG_04680 | <i>pkn_2</i> | 478555 | 478708 hypothetical protein                                 | 40   |      | 134.9  | 357.3  | 163.3  | 0    | 0               |
| SITYG_04690 | -            | 478997 | 478996 hypothetical protein                                 | 232  | S    | 308.6  | 503.0  | 459.7  | 3    | vivo-attenuated |
| SITYG_04700 | -            | 479592 | 480588 putative histidine kinase                            | 331  | T    | 324.9  | 485.4  | 594.9  | 0    | 0               |
| SITYG_04710 | -            | 480589 | 481222 two component response transcriptional regulator     | 210  | TK   | 380.1  | 1006.7 | 475.9  | 1    | alive in vivo   |
| SITYG_04720 | -            | 481261 | 482662 cyclophilin type peptidyl-prolyl cis-trans isomerase | 466  | R    | 544.8  | 298.0  | 716.8  | 0    | 0               |
| SITYG_04730 | -            | 482863 | 483056 S1 RNA binding domain protein                        | 130  | J    | 1688.8 | 1062.4 | 1303.2 | 0    | 0               |
| SITYG_04740 | -            | 483175 | 483493 hypothetical protein                                 | 105  |      | 1721.9 | 414.6  | 1136.8 | 0    | 0               |
| SITYG_04750 | -            | 483612 | 484146 hypothetical protein                                 | 177  | J    | 1204.1 | 535.0  | 1410.4 | 0    | 0               |
| SITYG_04760 | <i>recX</i>  | 484232 | 485009 regulatory protein recX                              | 258  | R    | 170.8  | 339.4  | 232.6  | 0    | 0               |
| SITYG_04770 | -            | 485072 | 485849 putative aminoglycoside 3'-phosphotransferase        | 258  | J    | 331.0  | 650.5  | 685.0  | 2    | alive in vivo   |
| SITYG_04780 | -            | 485905 | 487285 putative RNA methyltransferase                       | 459  | J    | 438.9  | 684.7  | 451.2  | 0    | 0               |
| SITYG_04790 | -            | 487649 | 487883 hypothetical protein                                 | 77   |      | 195.0  | 93.9   | 214.6  | 0    | 0               |
| SITYG_04800 | -            | 487882 | 489244 hypothetical protein                                 | 453  | S    | 624.4  | 1032.6 | 567.7  | 1    | alive in vivo   |
| SITYG_04810 | -            | 489254 | 489509 hypothetical protein                                 | 84   |      | 748.3  | 430.9  | 315.0  | 0    | 0               |
| SITYG_04820 | -            | 489759 | 490479 hypothetical protein                                 | 239  |      | 201.6  | 366.2  | 320.8  | 4    | vivo-attenuated |
| SITYG_04830 | -            | 490631 | 491291 hypothetical protein                                 | 219  |      | 408.5  | 568.0  | 471.7  | 0    | 0               |
| SITYG_04840 | -            | 491333 | 491909 putative acetyltransferase                           | 191  | J    | 223.3  | 267.1  | 174.3  | 0    | 0               |
| SITYG_04850 | -            | 491905 | 493192 hypothetical protein                                 | 428  | J    | 238.5  | 273.2  | 351.1  | 4    | alive in vivo   |
| SITYG_04860 | <i>valS</i>  | 493213 | 495865 valyl-tRNA synthetase                                | 883  | J    | 200.2  | 348.0  | 200.7  | 0    | 0               |
| SITYG_04870 | -            | 495966 | 497250 hypothetical protein                                 | 427  | L    | 345.7  | 308.1  | 438.0  | 4    | alive in vivo   |
| SITYG_04880 | -            | 497251 | 499150 putative nucleoside triphosphate hydrolase           | 632  |      | 799.5  | 486.0  | 772.1  | 8    | vivo-attenuated |
| SITYG_04890 | -            | 499151 | 499754 hypothetical protein                                 | 200  |      | 715.4  | 328.0  | 799.4  | 3    | alive in vivo   |
| SITYG_04900 | -            | 499746 | 500733 hypothetical protein                                 | 328  |      | 617.8  | 289.4  | 447.7  | 6    | vivo-attenuated |
| SITYG_04910 | -            | 501262 | 501409 hypothetical protein                                 | 48   | JD   | 395.1  | 299.0  | 409.9  | 0    | 0               |
| SITYG_04920 | -            | 501658 | 501805 hypothetical                                         | 48   | D    | 28.2   | 0.0    | 0.0    | 0    | 0               |
| SITYG_04930 | -            | 501833 | 501950 hypothetical protein                                 | 38   |      | 70.9   | 0.0    | 0.0    | 0    | 0               |
| SITYG_04940 | <i>cysK</i>  | 502225 | 503155 cysteine synthase                                    | 309  | E    | 1075.0 | 70.9   | 723.5  | 0    | 0               |
| SITYG_04950 | -            | 503254 | 503890 hypothetical protein                                 | 211  | S    | 260.9  | 172.8  | 284.2  | 1    | alive in vivo   |
| SITYG_04960 | <i>comFA</i> | 503946 | 505248 putative ATP-dependent RNA helicase                  | 433  | L    | 76.5   | 371.3  | 61.7   | 4    | alive in vivo   |
| SITYG_04970 | <i>comFC</i> | 505244 | 505910 putative competence protein                          |      |      |        |        |        |      |                 |

|             |               |        |        |                                                                  |     |     |        |        |        |      |                 |
|-------------|---------------|--------|--------|------------------------------------------------------------------|-----|-----|--------|--------|--------|------|-----------------|
| SITYG_05120 | <i>murD</i>   | 516661 | 518014 | UDP-N-acetylmuramoylalanine-D-glutamate ligase                   | 450 | M   | 312.7  | 633.4  | 348.8  | 0    |                 |
| SITYG_05130 | <i>murG</i>   | 518015 | 519086 | N-acetylglucosaminyl transferase                                 | 356 | M   | 197.5  | 328.3  | 393.8  | 0    |                 |
| SITYG_05140 | -             | 519082 | 520132 | putative cell division protein                                   | 349 | M   | 568.9  | 376.7  | 430.4  | 0    |                 |
| SITYG_05150 | <i>ftsA</i>   | 520254 | 521840 | cell division protein FtsA                                       | 461 | D   | 1912.5 | 1094.0 | 1717.1 | 0    |                 |
| SITYG_05160 | <i>ftsZ</i>   | 521657 | 522932 | cell division protein FtsZ                                       | 424 | D   | 1330.7 | 413.6  | 1023.9 | 0    |                 |
| SITYG_05170 | -             | 522933 | 523605 | pyridoxal 5'-phosphate-dependent enzymes class III               | 223 | R   | 679.0  | 425.1  | 478.2  | 0    |                 |
| SITYG_05180 | -             | 523614 | 524160 | putative cell division protein sepF                              | 181 | S   | 873.7  | 281.7  | 919.6  | 0    |                 |
| SITYG_05190 | -             | 524164 | 524428 | hypothetical genome                                              | 87  | S   | 2466.9 | 499.4  | 1141.1 | 0    |                 |
| SITYG_05200 | -             | 524431 | 525223 | RNA binding protein                                              | 263 | S   | 2236.5 | 693.6  | 1724.4 | 0    |                 |
| SITYG_05210 | <i>divIVA</i> | 525232 | 525019 | cell division protein DivIVA                                     | 291 | D   | 2491.0 | 363.4  | 1553.7 | 0    |                 |
| SITYG_05220 | <i>rseA</i>   | 526283 | 529076 | isoleucyl-tRNA synthetase                                        | 930 | J   | 298.5  | 354.0  | 327.2  | 0    |                 |
| SITYG_05230 | -             | 530065 | 531190 | hypothetical protein                                             | 374 | R   | 475.7  | 449.3  | 589.1  | 0    |                 |
| SITYG_05240 | <i>ackA</i>   | 531412 | 533059 | phosphoenolpyruvate carboxykinase                                | 548 | R   | 143.6  | 520.3  | 292.2  | 2    | alive in vivo   |
| SITYG_05250 | <i>hlyX</i>   | 533147 | 534488 | putative hemolysin                                               | 446 | C   | 730.0  | 573.5  | 816.2  | 2    | vivo-attenuated |
| SITYG_05260 | <i>treR</i>   | 534543 | 535275 | trehalose operon transcriptional repressor                       | 237 | K   | 87.1   | 615.5  | 337.5  | 4.2  |                 |
| SITYG_05270 | -             | 535435 | 537448 | PTS system trehalose-specific transporter subunit IABC           | 670 | G   | 651.2  | 884.2  | 758.3  | 2    | vivo-attenuated |
| SITYG_05280 | -             | 537615 | 539259 | putative trehalose-6-phosphate hydrolase                         | 547 | G   | 681.3  | 748.5  | 623.0  | 0    |                 |
| SITYG_05290 | -             | 539406 | 541581 | putative nuclease                                                | 724 | R   | 158.3  | 485.0  | 337.0  | 0    |                 |
| SITYG_05300 | <i>pta</i>    | 541749 | 542547 | pyruvate formate lyase activating enzyme                         | 265 | O   | 1143.6 | 578.3  | 943.8  | 0    |                 |
| SITYG_05310 | <i>ppaC</i>   | 542691 | 543827 | manganese dependent inorganic pyrophosphatase                    | 311 | C   | 1076.9 | 586.9  | 1223.1 | 0    |                 |
| SITYG_05320 | -             | 544127 | 544640 | hypothetical protein                                             | 170 |     | 121.3  | 428.4  | 97.9   | 0    |                 |
| SITYG_05330 | -             | 544623 | 545307 | hypothetical protein                                             | 227 |     | 97.0   | 449.8  | 264.3  | 0    |                 |
| SITYG_05340 | -             | 545638 | 546397 | hypothetical protein                                             | 252 |     | 131.2  | 608.0  | 145.5  | 0    |                 |
| SITYG_05350 | <i>murE</i>   | 546520 | 547966 | UDP-N-acetylmuramoylalanine-D-glutamate-2,6-diaminopelate ligase | 481 | M   | 424.6  | 395.1  | 388.9  | 0    |                 |
| SITYG_05360 | -             | 548051 | 549680 | polysaccharide biosynthesis protein                              | 542 | R   | 285.2  | 485.6  | 604.1  | 0    |                 |
| SITYG_05370 | -             | 549898 | 550018 | hypothetical protein                                             | 39  |     | 0.0    | 0.0    | 0.0    | 0    |                 |
| SITYG_05380 | -             | 550118 | 550286 | hypothetical protein                                             | 55  | E   | 49.4   | 130.8  | 0.0    | 0    |                 |
| SITYG_05390 | -             | 550471 | 551538 | beta-galactosidase                                               | 388 | E   | 191.9  | 376.5  | 172.1  | 0    |                 |
| SITYG_05400 | -             | 552109 | 554764 | translocating P-type ATPase                                      | 884 | P   | 293.7  | 486.6  | 472.8  | 0    |                 |
| SITYG_05410 | -             | 554861 | 555491 | uracil phosphoribosyltransferase                                 | 209 | F   | 3173.7 | 697.6  | 2199.7 | 4    | vivo-attenuated |
| SITYG_05420 | -             | 555603 | 556194 | ATP-dependent Clp protease proteolytic subunit                   | 196 | OU  | 589.6  | 334.6  | 611.7  | 1    | vivo-attenuated |
| SITYG_05430 | -             | 556284 | 556554 | hypothetical protein                                             | 89  | S   | 460.9  | 81.4   | 186.0  | 0    |                 |
| SITYG_05440 | -             | 556636 | 557800 | hypothetical protein                                             | 387 | E   | 245.9  | 302.1  | 405.5  | 1    | alive in vivo   |
| SITYG_05450 | -             | 558128 | 559052 | branched-chain amino acid ABC transporter permease               | 307 | E   | 166.1  | 475.6  | 826.0  | 1    | alive in vivo   |
| SITYG_05460 | -             | 559055 | 560006 | branched-chain amino acid ABC transporter permease               | 316 | E   | 104.7  | 415.9  | 337.9  | 3.5  | alive in vivo   |
| SITYG_05470 | -             | 560005 | 560770 | branched-chain amino acid ABC transporter                        | 254 | E   | 222.3  | 459.6  | 354.4  | 0    |                 |
| SITYG_05480 | -             | 560769 | 561480 | amino acid ABC transporter ATPase                                | 236 | E   | 250.9  | 309.1  | 155.4  | 0    |                 |
| SITYG_05490 | -             | 561627 | 562284 | hypothetical protein                                             | 218 | R   | 606.1  | 1605.5 | 259.8  | 0    |                 |
| SITYG_05500 | -             | 562348 | 563212 | hypothetical protein                                             | 287 | S   | 139.2  | 254.3  | 93.0   | 0    |                 |
| SITYG_05510 | -             | 563270 | 563384 | hypothetical protein                                             | 37  |     | 0.0    | 192.8  | 88.1   | 0    |                 |
| SITYG_05520 | -             | 563364 | 564003 | thymidylate kinase                                               | 212 | F   | 1324.3 | 515.8  | 1823.0 | 0    |                 |
| SITYG_05530 | -             | 563999 | 564893 | DNA polymerase III subunit delta                                 | 297 | L   | 1039.4 | 860.3  | 1235.6 | 0    |                 |
| SITYG_05540 | -             | 564915 | 565245 | initiation-control protein yabA                                  | 109 | S   | 942.8  | 732.5  | 1704.1 | 1    | alive in vivo   |
| SITYG_05550 | -             | 565247 | 566111 | putative tetrapyrrole methylase                                  | 287 | R   | 667.4  | 1119.1 | 720.6  | 0    |                 |
| SITYG_05560 | -             | 566122 | 566032 | methylated DNA-protein cysteine methyltransferase                | 169 | L   | 1236.3 | 517.1  | 1083.0 | 0    |                 |
| SITYG_05570 | -             | 566949 | 567003 | arsenate reductase                                               | 117 | P   | 105.5  | 186.2  | 141.8  | 0    |                 |
| SITYG_05580 | -             | 567138 | 567768 | endonuclease III                                                 | 209 | L   | 256.8  | 104.8  | 159.4  | 0    |                 |
| SITYG_05590 | -             | 567796 | 568182 | putative endonuclease                                            | 128 | E   | 107.2  | 170.3  | 77.8   | 2    | vivo-attenuated |
| SITYG_05600 | -             | 568193 | 569021 | putative glyoxalase                                              | 275 | L   | 210.4  | 238.9  | 327.5  | 1    | alive in vivo   |
| SITYG_05610 | -             | 569500 | 570400 | CAAX amino terminal protease                                     | 302 | R   | 95.8   | 290.1  | 176.8  | 1    | alive in vivo   |
| SITYG_05620 | -             | 570386 | 570668 | hypothetical protein                                             | 93  | K   | 73.5   | 389.6  | 462.0  | 6.8  | alive in vivo   |
| SITYG_05630 | -             | 570654 | 571290 | putative membrane protein                                        | 211 | S   | 150.0  | 241.9  | 205.3  | 1    | alive in vivo   |
| SITYG_05640 | -             | 571417 | 571873 | hypothetical protein                                             | 151 |     | 181.9  | 241.0  | 22.0   | -7.5 | -13.1           |
| SITYG_05650 | -             | 571869 | 572502 | hypothetical protein                                             | 210 | S   | 222.8  | 381.9  | 618.7  | 3.0  |                 |
| SITYG_05660 | -             | 572870 | 573131 | hypothetical protein                                             | 86  |     | 63.6   | 84.2   | 115.4  | 1    | alive in vivo   |
| SITYG_05670 | -             | 573377 | 573755 | methionyl-tRNA synthetase                                        | 665 | J   | 840.8  | 461.9  | 914.7  | 0    |                 |
| SITYG_05680 | -             | 575464 | 576846 | hypothetical protein                                             | 393 |     | 136.9  | 409.0  | 288.9  | 0    |                 |
| SITYG_05690 | -             | 576737 | 577424 | putative response regulator                                      | 228 | TK  | 1853.7 | 671.7  | 1271.7 | 1    | alive in vivo   |
| SITYG_05700 | -             | 577407 | 578388 | histidine kinase                                                 | 326 | T   | 321.4  | 134.4  | 348.0  | 0    |                 |
| SITYG_05710 | -             | 578510 | 579269 | hypothetical protein                                             | 252 |     | 16.4   | 289.5  | 291.1  | 19.3 | alive in vivo   |
| SITYG_05720 | -             | 579237 | 579375 | hypothetical protein                                             | 45  |     | 0.0    | 0.0    | 0.0    | 0    |                 |
| SITYG_05730 | -             | 579486 | 580266 | putative ABC transporter ATP-binding protein                     | 259 | V   | 53.2   | 676.1  | 141.6  | 0    |                 |
| SITYG_05740 | -             | 580246 | 582226 | ABC-type bacitracin resistance protein permease                  | 659 | V   | 163.4  | 655.9  | 390.5  | 0    |                 |
| SITYG_05750 | -             | 580374 | 583241 | ABC transporter protein                                          | 288 | V   | 47.8   | 399.5  | 127.4  | 0    |                 |
| SITYG_05760 | -             | 583242 | 584106 | putative ABC transporter protein                                 | 287 | V   | 91.2   | 483.2  | 488.2  | 8.8  | alive in vivo   |
| SITYG_05770 | -             | 584150 | 584888 | LytR family transcriptional regulator                            | 145 | KT  | 75.8   | 250.9  | 298.0  | 4.3  |                 |
| SITYG_05780 | -             | 584600 | 584990 | hypothetical protein                                             | 129 |     | 138.3  | 676.1  | 103.0  | 0    |                 |
| SITYG_05790 | -             | 585061 | 586027 | hypothetical protein                                             | 321 |     | 313.5  | 273.0  | 239.1  | 0    |                 |
| SITYG_05800 | -             | 586533 | 586862 | hypothetical protein                                             | 42  |     | 0.0    | 0.0    | 0.0    | 0    |                 |
| SITYG_05810 | -             | 586801 | 587569 | ABC-type antimicrobial peptide transport system ATPase component | 255 | V   | 64.8   | 429.2  | 91.5   | 0    |                 |
| SITYG_05820 | -             | 587561 | 589550 | ABC-type antimicrobial peptide transport system permease         | 662 | V   | 54.2   | 331.4  | 151.5  | 3.0  |                 |
| SITYG_05830 | -             | 589721 | 591110 | putative amino acid permease transporter                         | 462 | E   | 262.8  | 411.3  | 643.4  | 0    |                 |
| SITYG_05840 | -             | 591178 | 591607 | putative acyl-CoA N-acetyl transferase                           | 142 | KR  | 270.7  | 409.8  | 468.2  | 0    |                 |
| SITYG_05850 | -             | 591619 | 592081 | putative acyl-CoA N-acetyl transferase                           | 153 |     | 215.5  | 380.5  | 195.6  | 0    |                 |
| SITYG_05860 | -             | 592077 | 592716 | hypothetical protein                                             | 212 | G   | 175.3  | 447.1  | 110.0  | 0    |                 |
| SITYG_05870 | -             | 592861 | 593065 | putative major cold shock protein                                | 67  | K   | 589.7  | 0.0    | 443.0  | 0    |                 |
| SITYG_05880 | -             | 593259 | 593496 | hypothetical protein                                             | 78  |     | 1137.7 | 370.9  | 847.4  | 0    |                 |
| SITYG_05890 | -             | 593488 | 594187 | 3-ketoacyl-ACP reductase                                         | 232 | IQR | 178.0  | 628.7  | 387.9  | 0    |                 |
| SITYG_05900 | -             | 594198 | 594945 | putative acetyltransferase                                       | 248 |     | 177.7  | 470.7  | 295.7  | 0    |                 |
| SITYG_05910 | -             | 594941 | 595274 | hypothetical protein                                             | 110 |     | 286.5  | 593.9  | 301.6  | 0    |                 |
| SITYG_05920 | -             | 595283 | 595682 | hypothetical protein                                             | 132 |     | 239.1  | 385.5  | 402.7  | 0    |                 |
| SITYG_05930 | -             | 595731 | 595167 | hypothetical protein                                             | 148 | S   | 165.9  | 634.8  | 66.9   | 0    |                 |
| SITYG_05940 | <i>glmU</i>   | 596251 | 597631 | N-acetylglucosamine-1-phosphate uridylyltransferase              | 459 | M   | 742.5  | 602.5  | 749.5  | 0    |                 |
| SITYG_05950 | -             | 597630 | 598191 | hypothetical protein                                             | 183 | LR  | 804.1  | 915.6  | 545.8  | 0    |                 |
| SITYG_05960 | -             | 598195 | 598510 | hypothetical protein                                             | 104 |     | 750.6  | 488.3  | 699.5  | 0    |                 |
| SITYG_05970 | <i>pts</i>    | 598563 | 599256 | 5'-methylthioadenosine S-adenosylhomocysteine nucleosidase       | 230 | F   | 670.4  | 697.6  | 652.1  | 0    |                 |
| SITYG_05980 | -             | 599273 | 599582 | hypothetical protein                                             | 102 |     | 1423.0 | 640.0  | 650.0  | 0    |                 |
| SITYG_05990 | -             | 599694 | 601236 | putative ABC transporter ATP-binding protein                     | 513 | R   | 242.1  | 327.8  | 254.0  | 1    | alive in vivo   |
| SITYG_06000 | -             | 601562 | 602366 | peptidyl-prolyl cis-trans isomerase                              | 267 | O   | 593.3  | 574.0  | 512.1  | 1    | alive in vivo   |
| SITYG_06010 | -             | 602853 | 603063 | putative phage shock protein                                     | 69  | KT  | 1896.3 | 209.3  | 1243.3 | 0    |                 |
| SITYG_06020 | <i>ftsK</i>   | 603152 | 605450 | putative cell division protein                                   | 765 | D   | 525.3  | 564.2  | 760.4  | 1    | vivo-attenuated |
| SITYG_06030 | -             | 605796 | 608166 | cation transport ATPase                                          | 789 | P   | 253.8  | 296.7  | 326.3  | 3    | vivo-attenuated |
| SITYG_06040 | -             | 608185 | 608539 | putative membrane protein                                        | 117 |     | 82.0   | 248.3  | 56.7   | 1    | alive in vivo   |
| SITYG_06050 | -             | 608492 | 608821 | hypothetical protein                                             | 42  |     | 0.0    | 0.0    | 0.0    | 0    |                 |
| SITYG_06060 | <i>rpmK</i>   | 608700 | 609126 | 50S ribosomal protein L11                                        | 141 | J   | 4995.3 | 515.8  | 2758.0 | 0    |                 |
| SITYG_06070 | <i>rplA</i>   | 609215 | 609905 | 50S ribosomal protein L1                                         | 229 | J   | 1334.6 | 191.1  | 1091.5 | 0    |                 |
| SITYG_06080 | <i>pyrH</i>   | 610189 | 610930 | uridylylase                                                      | 246 | F   | 979.7  | 415.2  | 1029.9 | 0    |                 |
| SITYG_06090 | -             | 610933 | 611491 | ribosome recycling factor                                        | 185 | J   | 1174.6 | 433.2  | 683.9  | 0    |                 |
| SITYG_06100 | -             | 611603 | 612458 | hypothetical protein                                             | 284 | S   | 436.6  | 359.8  | 246.6  | 0    |                 |
| SITYG_06110 | -             | 612517 | 613555 | DNA polymerase III subunit delta                                 | 345 | L   | 627.4  | 529.3  | 551.4  | 0    |                 |
| SITYG_06120 | <i>sodA</i>   | 613625 | 614231 | manganese-dependent superoxide dismutase                         | 201 | P   | 1553.9 | 689.0  | 1425.1 | 0    |                 |
| SITYG_06130 | -             | 614303 | 614678 | hypothetical protein                                             | 124 |     | 66.4   | 234.4  | 107.1  | 0    |                 |
| SITYG_06140 | -             | 615158 | 617309 | putative ABC-type bacteriocin transporter                        | 716 | V   | 40.5   | 459.7  | 359.5  | 9.7  |                 |
| SITYG_06150 | -             | 617319 | 619681 | putative bacteriocin secretion accessory protein                 | 453 |     | 85.3   | 419.5  | 331.8  | 4.2  | alive in vivo   |
| SITYG_06160 | -             | 618777 | 618927 | hypothetical protein                                             | 49  |     | 0.0    | 146.5  | 0.0    | 0    |                 |
| SITYG_06170 | -             | 618971 | 619565 | putative histidine kinase                                        | 197 | T   | 244.4  | 369.9  | 186.0  | 1    | alive in vivo   |
| SITYG_06180 | -             | 619616 | 620288 | putative histidine kinase                                        | 223 | T   | 246.9  | 163.5  | 164.4  | 2    | alive in vivo   |
| SITYG_06190 | -             | 620289 | 621042 | putative response regulator                                      | 250 | KT  | 121.2  | 437.7  | 53.3   | 1    | alive in vivo   |
| SITYG_06200 | -             | 621204 | 621918 | hypothetical protein                                             | 237 | R   | 29.0   | 123.1  | 84.4   | 3.2  | alive in vivo   |
| SITYG_06210 | -             | 622149 | 622374 | putative bacteriocin, class Iib                                  | 74  |     | 55.3   | 390.7  | 89.3   | 0    |                 |
| SITYG_06220 | -             | 622395 | 622782 | hypothetical protein                                             | 128 |     | 32.2   |        |        |      |                 |

|             |             |        |        |                                                                        |      |      |        |        |        |     |                 |                 |
|-------------|-------------|--------|--------|------------------------------------------------------------------------|------|------|--------|--------|--------|-----|-----------------|-----------------|
| SITYG_06410 | <i>nagB</i> | 638118 | 638826 | glucosamine-6-phosphate deaminase                                      | 235  | G    | 152.3  | 248.3  | 312.0  | 1   | vivo-attenuated |                 |
| SITYG_06420 | -           | 638942 | 640301 | putative D-alanyl-D-alanine carboxypeptidase                           | 452  | M    | 653.2  | 258.7  | 657.6  | 1   | alive in vivo   |                 |
| SITYG_06430 | -           | 640379 | 641549 | hypothetical protein                                                   | 389  | GEPR | 177.3  | 507.1  | 240.3  | 1   | alive in vivo   |                 |
| SITYG_06440 | -           | 641845 | 643279 | 6-phospho-beta-glucosidase                                             | 477  | G    | 63.6   | 735.6  | 252.1  | 1   | alive in vivo   |                 |
| SITYG_06450 | -           | 643367 | 643607 | hypothetical protein                                                   | 79   | S    | 17.3   | 640.9  | 418.4  | 0   |                 |                 |
| SITYG_06460 | -           | 643722 | 644037 | PTS system, IIB component                                              | 104  | G    | 13.2   | 139.5  | 159.4  | 0   |                 |                 |
| SITYG_06470 | <i>celR</i> | 644092 | 640684 | putative transcriptional regulator                                     | 663  | K    | 54.1   | 319.9  | 216.8  | 4.4 | 2               | vivo-attenuated |
| SITYG_06480 | -           | 646096 | 646414 | putative PTS system, cellobiose-specific IIA component                 | 105  | G    | 130.4  | 1174.7 | 284.2  | 0   | 0               |                 |
| SITYG_06490 | -           | 646436 | 646943 | hypothetical protein                                                   | 168  |      | 24.5   | 303.4  | 0.0    | 0   | 0               |                 |
| SITYG_06500 | -           | 646982 | 646326 | PTS system cellobiose transporter subunit IIC                          | 447  | G    | 63.3   | 533.2  | 306.3  | 4.0 | 2               |                 |
| SITYG_06510 | <i>csiA</i> | 648414 | 640446 | putative competence protein CsiA                                       | 343  | R    | 44.2   | 149.1  | 165.4  | 4.1 | 2               | alive in vivo   |
| SITYG_06520 | -           | 649397 | 651200 | ogtendonpeptidase F                                                    | 600  | E    | 1120.4 | 499.7  | 690.6  | 0   | 2               | vivo-attenuated |
| SITYG_06530 | -           | 651201 | 651885 | O-methyltransferase                                                    | 227  | R    | 357.8  | 417.6  | 205.5  | 0   | 0               |                 |
| SITYG_06540 | -           | 651991 | 652930 | foldase protein PrsA                                                   | 312  | O    | 5190.7 | 444.6  | 2577.3 | 0   | 0               |                 |
| SITYG_06550 | -           | 653154 | 653640 | hypothetical protein                                                   | 161  | S    | 367.0  | 180.9  | 289.3  | 0   | 0               |                 |
| SITYG_06560 | <i>alaS</i> | 653685 | 656304 | alanyl-HRNA synthetase                                                 | 872  | J    | 402.3  | 495.0  | 460.1  | 0   | 0               |                 |
| SITYG_06570 | -           | 656366 | 657905 | ABC transporter, ATP-binding protein                                   | 512  | V    | 113.2  | 471.2  | 195.8  | 0   | 0               |                 |
| SITYG_06580 | -           | 657966 | 659205 | putative femAB family protein                                          | 412  | V    | 294.6  | 372.5  | 437.7  | 0   | 0               |                 |
| SITYG_06590 | <i>murM</i> | 659217 | 660432 | putative femAB family protein                                          | 404  | V    | 433.6  | 560.7  | 479.4  | 0   | 0               |                 |
| SITYG_06600 | -           | 660431 | 661241 | cof family protein                                                     | 269  | R    | 199.7  | 352.7  | 545.5  | 0   | 0               |                 |
| SITYG_06610 | -           | 661230 | 662625 | hypothetical protein                                                   | 464  | R    | 315.2  | 378.1  | 230.4  | 0   | 0               |                 |
| SITYG_06620 | -           | 662673 | 663060 | hypothetical protein                                                   | 128  |      | 235.8  | 170.3  | 233.5  | 0   | 0               |                 |
| SITYG_06630 | -           | 663423 | 666117 | putative calcium-translocating P-type ATPase                           | 897  | P    | 477.3  | 301.8  | 484.6  | 0   | 1               | alive in vivo   |
| SITYG_06640 | -           | 666137 | 666296 | hypothetical protein                                                   | 52   |      | 26.1   | 0.0    | 0.0    | 0   | 0               |                 |
| SITYG_06650 | <i>prfB</i> | 666774 | 667752 | peptide chain release factor 2                                         | 325  | J    | 1234.3 | 606.7  | 862.5  | 0   | 0               |                 |
| SITYG_06660 | <i>ftsE</i> | 667853 | 668546 | cell division ATP-binding protein FtsE                                 | 230  | D    | 706.3  | 222.0  | 681.1  | 0   | 0               |                 |
| SITYG_06670 | <i>ftsX</i> | 668538 | 669465 | cell division protein FtsX                                             | 308  | D    | 1230.6 | 568.9  | 974.9  | 0   | 0               |                 |
| SITYG_06680 | -           | 669499 | 670135 | hypothetical protein                                                   | 211  | R    | 215.2  | 276.4  | 315.8  | 0   | 0               |                 |
| SITYG_06690 | <i>dinG</i> | 670244 | 672731 | putative ATP-dependent DNA helicase DinG                               | 828  | KL   | 295.2  | 265.1  | 105.0  | 0   | 0               |                 |
| SITYG_06700 | -           | 672851 | 673832 | hypothetical protein                                                   | 326  | S    | 473.6  | 515.2  | 368.5  | 0   | 0               |                 |
| SITYG_06710 | <i>rodA</i> | 673858 | 675101 | rod-shaped determining protein                                         | 410  | D    | 242.2  | 695.1  | 407.2  | 0   | 0               |                 |
| SITYG_06720 | <i>thiJ</i> | 675113 | 675662 | 4-methyl-5(beta-hydroxyethyl)-thiazole monophosphate synthesis protein | 182  | R    | 959.6  | 480.3  | 621.9  | 0   | 1               | alive in vivo   |
| SITYG_06730 | -           | 675789 | 676353 | putative HAD superfamily hydrolase                                     | 187  | R    | 1500.4 | 662.4  | 1210.7 | 0   | 0               |                 |
| SITYG_06740 | <i>gyrB</i> | 676365 | 678312 | DNA gyrase subunit B                                                   | 648  | L    | 718.0  | 485.3  | 557.0  | 0   | 0               |                 |
| SITYG_06750 | <i>ezrA</i> | 678399 | 680124 | septation ring formation regulator EzrA                                | 574  | D    | 988.3  | 318.5  | 809.2  | 0   | 2               | vivo-attenuated |
| SITYG_06760 | -           | 680243 | 681257 | hypothetical protein                                                   | 337  | G    | 511.4  | 260.1  | 435.7  | 0   | 0               |                 |
| SITYG_06770 | -           | 681645 | 682302 | putative two-component response regulator                              | 218  | TK   | 669.3  | 367.9  | 489.1  | 0   | 1               | alive in vivo   |
| SITYG_06780 | -           | 682298 | 683675 | putative two component system histidine kinase                         | 458  | T    | 1027.3 | 766.0  | 787.6  | 0   | 4               | alive in vivo   |
| SITYG_06790 | -           | 683999 | 684644 | hypothetical protein                                                   | 214  |      | 430.9  | 340.7  | 435.9  | 0   | 1               | alive in vivo   |
| SITYG_06800 | <i>thrS</i> | 684636 | 686801 | threonyl-tRNA synthetase                                               | 654  | J    | 576.3  | 469.7  | 659.2  | 0   | 0               |                 |
| SITYG_06810 | -           | 686824 | 687379 | putative transcriptional regulator                                     | 184  | K    | 127.1  | 118.8  | 72.4   | 0   | 0               |                 |
| SITYG_06820 | -           | 687514 | 688216 | ABC transporter, ATP-binding protein                                   | 233  | V    | 242.3  | 438.2  | 529.3  | 0   | 0               |                 |
| SITYG_06830 | -           | 688226 | 691992 | hypothetical protein                                                   | 1121 | V    | 382.0  | 633.3  | 429.6  | 0   | 0               |                 |
| SITYG_06840 | -           | 691683 | 692514 | putative metallo-dependent phosphatase                                 | 276  | T    | 259.6  | 396.7  | 217.5  | 0   | 1               | alive in vivo   |
| SITYG_06850 | -           | 692590 | -      | -                                                                      | 105  | K    | 875.1  | 692.0  | 577.8  | 0   | 0               |                 |
| SITYG_06860 | -           | 693065 | 693842 | putative glycol-rialdenyl enzyme activating protein                    | 258  | O    | 37.4   | 424.2  | 155.1  | 4.5 | 1               | alive in vivo   |
| SITYG_06870 | -           | 693619 | 693942 | hypothetical protein                                                   | 40   |      | 0.0    | 0.0    | 0.0    | 0   | 0               |                 |
| SITYG_06880 | -           | 693974 | 694718 | transcriptional regulator, DeoR family                                 | 247  | KG   | 245.3  | 502.1  | 580.4  | 0   | 0               |                 |
| SITYG_06890 | -           | 694736 | 695699 | transcriptional regulator                                              | 320  | K    | 202.5  | 387.9  | 156.4  | 0   | 0               |                 |
| SITYG_06900 | -           | 695643 | 696267 | PTS system, IIA component                                              | 107  | G    | 64.0   | 542.6  | 124.0  | 0   | 1               | alive in vivo   |
| SITYG_06910 | -           | 696287 | 696599 | PTS system, cellobiose-specific IIB component                          | 103  | G    | 13.3   | 281.7  | 32.2   | 0   | 0               |                 |
| SITYG_06920 | -           | 696610 | 697912 | PTS system, cellobiose-specific IIC component                          | 433  | G    | 95.6   | 590.7  | 254.5  | 0   | 3               | alive in vivo   |
| SITYG_06930 | -           | 698076 | 700524 | pyruvate formate lyase                                                 | 815  | C    | 64.4   | 475.8  | 176.4  | 0   | 2               | alive in vivo   |
| SITYG_06940 | -           | 700538 | 701207 | putative fructose-6-phosphate aldolase                                 | 222  | G    | 24.8   | 98.5   | 165.1  | 7.2 | 0               |                 |
| SITYG_06950 | <i>glcA</i> | 701319 | 702408 | glycerol dehydrogenase                                                 | 362  | C    | 91.4   | 464.1  | 691.6  | 8.2 | 1               | alive in vivo   |
| SITYG_06960 | -           | 702726 | 703350 | hypothetical protein                                                   | 207  |      | 146.2  | 422.6  | 434.5  | 3.2 | 0               |                 |
| SITYG_06970 | -           | 703340 | 703882 | hypothetical protein                                                   | 113  |      | 12.1   | 64.3   | 29.4   | 0   | 0               |                 |
| SITYG_06980 | -           | 703759 | 704371 | hypothetical protein                                                   | 203  |      | 542.2  | 502.7  | 672.7  | 0   | 0               |                 |
| SITYG_06990 | -           | 704361 | 704703 | hypothetical protein                                                   | 113  |      | 48.5   | 192.8  | 117.5  | 0   | 0               |                 |
| SITYG_07000 | -           | 704780 | 705392 | hypothetical protein                                                   | 203  |      | 704.9  | 323.2  | 918.9  | 0   | 0               |                 |
| SITYG_07010 | -           | 705382 | 706705 | hypothetical protein                                                   | 440  |      | 692.9  | 548.1  | 759.0  | 0   | 1               | alive in vivo   |
| SITYG_07020 | -           | 706719 | 707025 | hypothetical protein                                                   | 101  |      | 745.6  | 359.1  | 262.5  | 0   | 0               |                 |
| SITYG_07030 | -           | 707026 | 707344 | hypothetical protein                                                   | 105  |      | 973.3  | 132.1  | 757.9  | 0   | 0               |                 |
| SITYG_07040 | -           | 707698 | 711171 | endo-beta-N-acetylglucosaminidase                                      | 1169 | G    | 51.2   | 441.6  | 196.1  | 4.2 | 2               | alive in vivo   |
| SITYG_07050 | -           | 711399 | 713476 | putative alpha-1,2-mannosidase                                         | 692  | G    | 99.8   | 644.8  | 323.6  | 3.5 | 0               |                 |
| SITYG_07060 | -           | 713646 | 714935 | putative glycosyl hydrolase                                            | 429  | G    | 57.9   | 425.9  | 451.5  | 8.5 | 0               |                 |
| SITYG_07070 | -           | 714936 | 717570 | putative alpha-mannosidase                                             | 877  | G    | 50.4   | 308.7  | 87.7   | 0   | 4               | vivo-attenuated |
| SITYG_07080 | -           | 717635 | 718514 | ROK family protein                                                     | 292  | KG   | 89.7   | 500.0  | 125.7  | 0   | 0               |                 |
| SITYG_07090 | -           | 718498 | 720382 | N-acetyl-beta-D-glucosaminidase                                        | 627  |      | 81.5   | 571.5  | 191.9  | 0   | 1               | alive in vivo   |
| SITYG_07100 | -           | 720526 | 721489 | ABC sugar transporter permease protein                                 | 320  | G    | 51.7   | 365.1  | 312.8  | 6.6 | 1               | vivo-attenuated |
| SITYG_07110 | -           | 721502 | 722435 | ABC sugar transporter membrane spanning permease                       | 310  | G    | 53.4   | 447.5  | 258.3  | 5.3 | 3               | vivo-attenuated |
| SITYG_07120 | -           | 722523 | 724005 | putative transporter protein                                           | 493  | G    | 58.8   | 578.3  | 203.3  | 3.8 | 0               |                 |
| SITYG_07130 | -           | 724266 | 724887 | hypothetical protein                                                   | 206  | S    | 86.8   | 106.2  | 242.6  | 3.0 | 1               | alive in vivo   |
| SITYG_07140 | -           | 724883 | 726527 | putative histidine kinase                                              | 547  | T    | 196.8  | 441.1  | 458.1  | 0   | 0               |                 |
| SITYG_07150 | -           | 726537 | 727830 | putative response regulator                                            | 430  | T    | 80.2   | 390.9  | 201.9  | 0   | 1               | alive in vivo   |
| SITYG_07160 | -           | 727920 | 728487 | hypothetical protein                                                   | 188  | S    | 109.7  | 348.8  | 53.1   | 0   | 2               | alive in vivo   |
| SITYG_07170 | -           | 728573 | 730082 | DNA methyltransferase                                                  | 502  | V    | 285.9  | 597.1  | 519.1  | 0   | 1               | alive in vivo   |
| SITYG_07180 | -           | 730068 | 730617 | putative restriction endonuclease                                      | 182  | V    | 113.3  | 480.3  | 237.8  | 0   | 0               |                 |
| SITYG_07190 | -           | 730601 | 731156 | putative restriction endonuclease subunit S                            | 184  | V    | 164.4  | 0.0    | 36.2   | 4.2 | 0               |                 |
| SITYG_07200 | -           | 731227 | 732214 | putative phage integrase                                               | 328  | L    | 369.8  | 467.5  | 437.5  | 0   | 0               |                 |
| SITYG_07210 | -           | 732224 | 733315 | putative type I restriction enzyme                                     | 362  | V    | 331.4  | 726.4  | 399.0  | 0   | 0               |                 |
| SITYG_07220 | -           | 733349 | 733964 | hypothetical protein                                                   | 194  |      | 259.8  | 153.4  | 199.0  | 0   | 0               |                 |
| SITYG_07230 | -           | 733929 | 734820 | hypothetical protein                                                   | 298  |      | 203.5  | 367.5  | 526.2  | 3.6 | 2               | vivo-attenuated |
| SITYG_07240 | -           | 734830 | 737932 | type I deoxyribonuclease HsdR                                          | 1030 | V    | 299.1  | 426.3  | 263.0  | 0   | 3               | vivo-attenuated |
| SITYG_07250 | <i>lysS</i> | 738158 | 736646 | lysyl-tRNA synthetase                                                  | 495  | J    | 1017.5 | 310.1  | 668.1  | 0   | 0               |                 |
| SITYG_07260 | -           | 739278 | 740370 | phosphoglycerate mutase                                                | 213  | G    | 694.9  | 616.1  | 453.6  | 0   | 0               |                 |
| SITYG_07270 | -           | 740394 | 740871 | putative prolyl-tRNA synthetase                                        | 158  | S    | 774.0  | 414.6  | 757.9  | 0   | 0               |                 |
| SITYG_07280 | -           | 740870 | 741713 | hypothetical protein                                                   | 280  | S    | 295.2  | 417.1  | 345.5  | 0   | 0               |                 |
| SITYG_07290 | -           | 741868 | 744211 | cation transport ATPase                                                | 780  | P    | 286.8  | 384.5  | 274.3  | 0   | 2               | alive in vivo   |
| SITYG_07300 | -           | 744341 | 745082 | 1-acyl-sn-glycerol-3-phosphate acyltransferase                         | 246  | I    | 526.2  | 326.2  | 284.6  | 0   | 0               |                 |
| SITYG_07310 | -           | 745212 | 745854 | putative glutamine amidotransferase                                    | 213  | R    | 96.9   | 239.6  | 125.1  | 0   | 1               | alive in vivo   |
| SITYG_07320 | -           | 746054 | 748061 | putative dipeptidase                                                   | 668  | E    | 90.9   | 1335.8 | 230.2  | 0   | 1               | alive in vivo   |
| SITYG_07330 | -           | 748599 | 748728 | hypothetical protein                                                   | 42   |      | 192.9  | 0.0    | 155.7  | 0   | 0               |                 |
| SITYG_07340 | -           | 748823 | 749525 | CAAX amino terminal protease                                           | 233  | R    | 537.7  | 344.3  | 486.4  | 0   | 1               | alive in vivo   |
| SITYG_07350 | <i>nraF</i> | 749651 | 750611 | ribonucleotide-diphosphate reductase subunit beta                      | 319  | F    | 423.5  | 412.0  | 272.0  | 0   | 1               | vivo-attenuated |
| SITYG_07360 | -           | 750621 | 751008 | hypothetical protein                                                   | 128  | S    | 653.8  | 340.7  | 467.1  | 0   | 0               |                 |
| SITYG_07370 | <i>nraE</i> | 751037 | 753197 | ribonucleotide-diphosphate reductase subunit alpha                     | 719  | F    | 389.9  | 295.0  | 451.0  | 0   | 0               |                 |
| SITYG_07380 | -           | 753296 | 753515 | glutaredoxin                                                           | 72   | O    | 246.2  | 100.3  | 962.9  | 0   | 0               |                 |
| SITYG_07390 | -           | 753897 | 754161 | phosphocarnitine protein HPr                                           | 87   | G    | 7762.1 | 1664.7 | 3879.9 | 0   | 0               |                 |
| SITYG_07400 | -           | 754162 | 755696 | phosphoenolpyruvate-protein kinase                                     | 577  | G    | 3141.0 | 849.1  | 2125.4 | 0   | 0               |                 |
| SITYG_07410 | -           | 755929 | 756055 | hypothetical protein                                                   | 41   |      | 32.9   | 0.0    | 0.0    | 0   | 0               |                 |
| SITYG_07420 | <i>uvrC</i> | 756047 | 757856 | excinuclease ABC subunit C                                             | 602  | L    | 233.9  | 425.2  | 283.1  | 0   | 0               |                 |
| SITYG_07430 | -           | 757964 | 758570 | putative nitroreductase                                                | 201  | C    | 657.1  | 580.2  | 596.6  | 0   | 2               | vivo-attenuated |
| SITYG_07440 | <i>pepV</i> | 758598 | 759999 | dipeptidase PepV                                                       | 466  | E    | 701.7  | 533.3  | 802.8  | 0   | 0               |                 |
| SITYG_07450 | -           | 760230 | 760527 | hypothetical protein                                                   | 98   | MG   | 97.8   | 813.   |        |     |                 |                 |

|             |      |        |                                                              |      |    |         |        |        |        |                 |
|-------------|------|--------|--------------------------------------------------------------|------|----|---------|--------|--------|--------|-----------------|
| SITYG_07700 | aroE | 790684 | 791539 shikimate 5-dehydrogenase                             | 284  | E  | 184.4   | 154.2  | 176.2  | 0      |                 |
| SITYG_07710 | aroB | 791549 | 792617 3-dehydroquinate synthase                             | 355  | E  | 337.9   | 473.2  | 413.7  | 1      | alive in vivo   |
| SITYG_07720 | aroC | 792650 | 793817 chorismate synthase                                   | 388  | E  | 280.8   | 320.1  | 120.5  | 0      |                 |
| SITYG_07730 | -    | 793816 | 794653 putative transport protein                            | 278  | R  | 302.3   | 577.6  | 443.9  | 0      |                 |
| SITYG_07740 | -    | 794649 | 795030 hypothetical protein                                  | 126  | S  | 261.3   | 634.4  | 263.6  | 0      |                 |
| SITYG_07750 | -    | 795040 | 796147 prephenate dehydrogenase                              | 368  | E  | 191.1   | 476.4  | 408.2  | 0      |                 |
| SITYG_07760 | -    | 796158 | 796497 hypothetical protein                                  | 112  | S  | 232.5   | 194.5  | 118.5  | 2      | vivo-attenuated |
| SITYG_07770 | aroA | 796937 | 798233 3-phosphoshikimate 1-carboxyvinyltransferase          | 431  | E  | 371.3   | 610.4  | 612.1  | 0      |                 |
| SITYG_07780 | aroK | 798225 | 798702 shikimate kinase                                      | 158  | E  | 147.8   | 460.7  | 357.9  | 0      |                 |
| SITYG_07790 | pheA | 799599 | 799532 prephenate dehydrogenase                              | 277  | E  | 194.0   | 474.3  | 590.0  | 0      |                 |
| SITYG_07800 | -    | 799544 | 800882 putative transcriptional attenuator                   | 445  | K  | 927.0   | 821.2  | 848.1  | 3.5    |                 |
| SITYG_07810 | -    | 800955 | 802326 RNA methyltransferase                                 | 456  | J  | 111.9   | 336.6  | 271.0  | 1      | alive in vivo   |
| SITYG_07820 | -    | 802643 | 803549 transcriptional regulator                             | 301  | K  | 91.6    | 824.7  | 199.5  | 0      |                 |
| SITYG_07830 | -    | 803678 | 805034 putative drug resistance transporter                  | 301  | K  | 88.7    | 615.8  | 466.6  | 5.7    |                 |
| SITYG_07840 | -    | 805068 | 805512 hypothetical protein                                  | 147  | S  | 84.1    | 346.4  | 45.2   | 0      |                 |
| SITYG_07850 | -    | 805606 | 806047 hypothetical protein                                  | 146  | S  | 37.6    | 249.1  | 45.5   | 0      |                 |
| SITYG_07860 | -    | 806103 | 806961 putative oxidoreductase                               | 285  | R  | 48.3    | 332.9  | 117.0  | 0      |                 |
| SITYG_07870 | -    | 807127 | 807697 hypothetical protein                                  | 189  | S  | 72.8    | 347.0  | 352.4  | 5.3    |                 |
| SITYG_07880 | -    | 807929 | 808736 putative alpha/beta hydrolase family protein          | 268  | R  | 51.4    | 81.7   | 174.2  | 1      | alive in vivo   |
| SITYG_07890 | -    | 808747 | 808876 putative ADP-ribosylglycohydrolase                    | 42   | O  | 64.3    | 681.4  | 1012.0 | 17.1   |                 |
| SITYG_07900 | -    | 809098 | 810625 ABC transporter, ATP-binding protein                  | 508  | V  | 73.3    | 460.5  | 197.3  | 2      | alive in vivo   |
| SITYG_07910 | -    | 811527 | 812253 putative cyclase                                      | 241  | V  | 40.0    | 302.7  | 276.6  | 7.5    |                 |
| SITYG_07920 | -    | 812252 | 812987 hypothetical protein                                  | 244  | A  | 28.2    | 59.8   | 368.9  | 14.2   | 5.1             |
| SITYG_07930 | -    | 813476 | 813845 hypothetical protein                                  | 122  | O  | 123.7   | 476.4  | 81.6   | 0      |                 |
| SITYG_07940 | -    | 814034 | 814721 putative response regulator                           | 228  | TK | 471.0   | 223.9  | 423.9  | 0      |                 |
| SITYG_07950 | -    | 814713 | 816057 hypothetical protein                                  | 447  | T  | 271.6   | 392.4  | 269.0  | 1      | alive in vivo   |
| SITYG_07960 | -    | 816335 | 817105 -                                                     | 242  | V  | 79.3    | 387.8  | 162.4  | 0      |                 |
| SITYG_07970 | -    | 817166 | 817475 hypothetical protein                                  | 242  | A  | 45.5    | 150.7  | 399.5  | 9.8    | 1               |
| SITYG_07980 | -    | 817731 | 818379 hypothetical protein                                  | 215  | M  | 64      | 305.2  | 124.0  | 0      |                 |
| SITYG_07990 | -    | 818710 | 819049 hypothetical protein                                  | 112  | L  | 24.5    | 194.5  | 148.1  | 6.8    |                 |
| SITYG_08000 | -    | 819033 | 819153 hypothetical protein                                  | 39   | -  | 0.0     | 0.0    | 0.0    | 0      |                 |
| SITYG_08010 | -    | 819536 | 819671 hypothetical protein                                  | 44   | K  | 0.0     | 0.0    | 0.0    | 0      |                 |
| SITYG_08020 | -    | 819669 | 819933 hypothetical protein                                  | 87   | C  | 0.0     | 0.0    | 152.2  | -152.2 | 0               |
| SITYG_08030 | -    | 820398 | 821094 glycosyltransferase                                   | 231  | M  | 1281.4  | 947.2  | 1269.7 | 0      |                 |
| SITYG_08040 | -    | 821101 | 821443 hypothetical protein                                  | 113  | M  | 133.4   | 64.3   | 0.0    | -133.4 | 1               |
| SITYG_08050 | -    | 821426 | 822710 polysaccharide biosynthesis protein                   | 427  | R  | 646.1   | 462.1  | 531.8  | 0      |                 |
| SITYG_08060 | -    | 822699 | 823695 putative glycosyl transferase                         | 331  | M  | 962.1   | 330.9  | 806.6  | 1      | alive in vivo   |
| SITYG_08070 | -    | 823738 | 825283 putative membrane protein                             | 514  | S  | 534.3   | 369.8  | 292.5  | 0      |                 |
| SITYG_08080 | -    | 825308 | 825959 calcium-binding protein                               | 216  | -  | 1013.1  | 303.8  | 956.4  | 0      |                 |
| SITYG_08090 | -    | 826060 | 826987 putative glycosyl transferase                         | 308  | M  | 590.7   | 308.2  | 736.6  | 1      | alive in vivo   |
| SITYG_08100 | -    | 827060 | 827912 hypothetical protein                                  | 283  | M  | 1124.7  | 180.5  | 1025.4 | 0      |                 |
| SITYG_08110 | rgpA | 828014 | 829163 putative glycosyl transferase                         | 382  | M  | 942.3   | 286.9  | 690.4  | 0      |                 |
| SITYG_08120 | rgpB | 829159 | 830095 putative glycosyl transferase                         | 311  | M  | 580.6   | 305.2  | 515.0  | 0      |                 |
| SITYG_08130 | rgpC | 830097 | 830904 ABC-2 type transporter                                | 268  | GM | 945.8   | 708.0  | 708.3  | 0      |                 |
| SITYG_08140 | -    | 830903 | 832124 ABC transporter, ATP-binding protein                  | 406  | GM | 604.7   | 521.9  | 534.6  | 0      |                 |
| SITYG_08150 | -    | 832149 | 833361 putative glycosyltransferase                          | 583  | M  | 707.9   | 627.1  | 521.6  | 1      | vivo-attenuated |
| SITYG_08160 | -    | 833587 | 835655 putative mamman synthesis protein F                   | 586  | M  | 803.3   | 262.0  | 741.3  | 0      |                 |
| SITYG_08170 | -    | 835771 | 838230 -                                                     | 586  | M  | 158.6   | 205.5  | 130.7  | 2      | alive in vivo   |
| SITYG_08180 | -    | 838410 | 839100 SAM-dependent methyltransferase                       | 229  | R  | 553.1   | 414.0  | 392.9  | 1      | alive in vivo   |
| SITYG_08190 | -    | 839086 | 839884 hypothetical protein                                  | 265  | S  | 285.9   | 716.0  | 339.8  | 2      | vivo-attenuated |
| SITYG_08200 | -    | 839969 | 840440 putative phosphohydrolase                             | 156  | LR | 378.7   | 513.2  | 916.8  | 1      | alive in vivo   |
| SITYG_08210 | rmlA | 840580 | 841450 glucose-1-phosphate thymidyltransferase               | 289  | M  | 1659.3  | 732.5  | 1581.3 | 0      |                 |
| SITYG_08220 | -    | 841453 | 842047 putative dTDP-4-dehydroammonse 3,5-epimerase          | 197  | M  | 761.2   | 406.9  | 591.7  | 0      |                 |
| SITYG_08230 | -    | 842080 | 843127 dTDP-glucose 4,6-dehydratase                          | 348  | M  | 903.3   | 440.8  | 815.3  | 0      |                 |
| SITYG_08240 | -    | 843161 | 844181 UDP-glucose 4-epimerase                               | 339  | M  | 1545.4  | 797.1  | 1634.3 | 1      | vivo-attenuated |
| SITYG_08250 | -    | 844499 | 845081 putative methyltransferase                            | 193  | QR | 156.8   | 490.8  | 138.0  | 4      | vivo-attenuated |
| SITYG_08260 | pepQ | 845347 | 846430 putative proline dipeptidase                          | 360  | E  | 425.2   | 547.8  | 278.2  | 2      | vivo-attenuated |
| SITYG_08270 | ccpA | 846693 | 847898 catabolite control protein A                          | 334  | K  | 1155.7  | 393.6  | 992.2  | 0      |                 |
| SITYG_08280 | -    | 847772 | 848789 putative glycosyl transferase                         | 338  | M  | 770.9   | 777.9  | 849.2  | 1      | alive in vivo   |
| SITYG_08290 | -    | 848790 | 850104 glycosyltransferase                                   | 437  | M  | 334.6   | 434.8  | 366.8  | 0      |                 |
| SITYG_08300 | -    | 850130 | 850472 hypothetical protein                                  | 113  | -  | 315.4   | 321.3  | 411.1  | 1      | alive in vivo   |
| SITYG_08310 | -    | 850770 | 851472 putative response transcriptional regulator           | 233  | TK | 555.5   | 532.1  | 586.5  | 0      |                 |
| SITYG_08320 | -    | 851494 | 852817 putative histidine sensory kinase                     | 450  | T  | 604.0   | 497.2  | 784.5  | 4      | vivo-attenuated |
| SITYG_08330 | vixX | 853622 | 853922 zinc-dependent hydrolase                              | 267  | R  | 694.0   | 246.0  | 711.9  | 0      |                 |
| SITYG_08340 | -    | 853630 | 853990 hypothetical protein                                  | 219  | S  | 172.8   | 0.0    | 27.9   | -8.7   | 0               |
| SITYG_08350 | -    | 854278 | 855077 ribonuclease III                                      | 232  | K  | 255.2   | 157.2  | 244.2  | 1      | alive in vivo   |
| SITYG_08360 | smc  | 855067 | 855601 structural maintenance of chromosomes protein         | 1177 | D  | 476.6   | 466.4  | 598.3  | 0      |                 |
| SITYG_08370 | -    | 855902 | 855937 HAD hydrolase, IIB family protein                     | 264  | R  | 537.4   | 525.2  | 656.8  | 2      | alive in vivo   |
| SITYG_08380 | -    | 855936 | 860209 putative hydrolase                                    | 270  | R  | 326.5   | 324.3  | 741.1  | 1      | vivo-attenuated |
| SITYG_08390 | ftsY | 860221 | 861691 cell division protein                                 | 489  | U  | 1021.5  | 792.3  | 724.1  | 0      |                 |
| SITYG_08400 | -    | 861757 | 862189 hypothetical protein                                  | 143  | -  | 1546.0  | 1169.9 | 1162.3 | 1      | alive in vivo   |
| SITYG_08410 | ppdK | 862389 | 864999 pyruvate phosphate dikinase                           | 869  | G  | 42.9    | 235.7  | 103.9  | 1      | alive in vivo   |
| SITYG_08420 | -    | 865179 | 865809 hypothetical protein                                  | 200  | R  | 131.7   | 34.9   | 15.9   | -17.9  | 0               |
| SITYG_08430 | -    | 865821 | 866646 hypothetical protein                                  | 274  | S  | 120.7   | 319.6  | 426.0  | 3.8    | 3               |
| SITYG_08440 | -    | 866681 | 866804 frimicute fructose-1,6-bisphosphatase                 | 640  | G  | 161.8   | 422.8  | 323.8  | 4      | vivo-attenuated |
| SITYG_08450 | -    | 868727 | 869870 putative cysteine desulfurase                         | 380  | E  | 225.0   | 211.5  | 228.4  | 4      | vivo-attenuated |
| SITYG_08460 | thiI | 869873 | 871088 thiamine biosynthesis protein                         | 404  | H  | 273.1   | 307.5  | 284.5  | 1      | alive in vivo   |
| SITYG_08470 | -    | 871109 | 871631 hypothetical protein                                  | 173  | O  | 333.8   | 505.2  | 673.3  | 2      | alive in vivo   |
| SITYG_08480 | rplU | 871849 | 872164 50S ribosomal protein L21                             | 104  | J  | 7282.3  | 558.1  | 3666.1 | 0      |                 |
| SITYG_08490 | -    | 872180 | 872525 hypothetical protein                                  | 114  | J  | 14007.6 | 955.4  | 8673.9 | 0      |                 |
| SITYG_08500 | rpmA | 872542 | 872836 50S ribosomal protein L27                             | 97   | J  | 10187.0 | 373.7  | 5943.2 | 0      |                 |
| SITYG_08510 | -    | 873059 | 873506 NAD(P)+-dependent dehydrogenase                       | 551  | R  | 155.3   | 451.2  | 212.2  | 3      | alive in vivo   |
| SITYG_08520 | -    | 875101 | 875284 hypothetical protein                                  | 60   | P  | 22.7    | 120.1  | 0.0    | 0      |                 |
| SITYG_08530 | -    | 875416 | 875905 hypothetical protein                                  | 162  | S  | 644.7   | 1977.3 | 1252.7 | 1      | alive in vivo   |
| SITYG_08540 | -    | 876470 | 877325 hypothetical protein                                  | 284  | R  | 116.4   | 179.9  | 328.9  | 3.1    | 2               |
| SITYG_08550 | -    | 877461 | 878370 transcriptional regulator                             | 302  | K  | 1268.6  | 797.8  | 1115.8 | 0      |                 |
| SITYG_08560 | ispA | 878366 | 878840 putative signal peptidase II                          | 157  | MU | 927.7   | 695.4  | 699.1  | 0      |                 |
| SITYG_08570 | riuD | 878817 | 879714 23S rRNA pseudouridine synthase                       | 298  | J  | 323.7   | 416.5  | 212.7  | 0      |                 |
| SITYG_08580 | -    | 879861 | 880203 glutamate 5-kinase                                    | 113  | E  | 121.3   | 449.8  | 58.7   | 0      |                 |
| SITYG_08590 | -    | 880247 | 881216 hypothetical protein                                  | 322  | R  | 154.1   | 498.9  | 310.9  | 0      |                 |
| SITYG_08600 | phnA | 881300 | 881642 PhnA protein                                          | 113  | P  | 2001.3  | 128.5  | 1086.4 | 1      | alive in vivo   |
| SITYG_08610 | -    | 881649 | 882285 hypothetical protein                                  | 211  | -  | 156.5   | 380.1  | 284.2  | 0      |                 |
| SITYG_08620 | -    | 882482 | 882941 hypothetical protein                                  | 152  | -  | 81.3    | 383.0  | 284.4  | 3.8    | 3               |
| SITYG_08630 | -    | 882971 | 883325 hypothetical protein                                  | 117  | -  | 140.6   | 620.8  | 340.4  | 1      | alive in vivo   |
| SITYG_08640 | -    | 883363 | 883627 chorismate mutase                                     | 87   | E  | 691.4   | 416.2  | 722.7  | 0      |                 |
| SITYG_08650 | -    | 883642 | 884860 putative permease, chloride channel                   | 405  | P  | 214.6   | 523.2  | 494.7  | 0      |                 |
| SITYG_08660 | thyA | 884945 | 885785 thymidylate synthase                                  | 279  | F  | 775.3   | 235.4  | 693.4  | 0      |                 |
| SITYG_08670 | -    | 885787 | 886003 hypothetical protein                                  | 71   | -  | 153.6   | 406.9  | 46.5   | -3.0   | -10.5           |
| SITYG_08680 | -    | 886069 | 886582 dihydrofolate reductase                               | 170  | H  | 3646.8  | 1028.1 | 2427.3 | 0      |                 |
| SITYG_08690 | -    | 886581 | 886755 hypothetical protein                                  | 57   | O  | 252.2   | 0.0    | 955.7  | 0      |                 |
| SITYG_08700 | cpX  | 886808 | 888041 ATP-dependent Clp protease, ATP-binding subunit ClpX  | 410  | O  | 440.7   | 196.0  | 390.9  | 3.6    | -885.7          |
| SITYG_08710 | -    | 888053 | 888641 putative ribosome biogenesis GTP-binding protein YxxC | 195  | R  | 910.1   | 411.1  | 956.4  | 1      | alive in vivo   |
| SITYG_08720 | -    | 888763 | 889471 putative autolysin/N-acetylmuramidase                 | 235  | NU | 1997.9  | 434.5  | 1588.6 | 0      |                 |
| SITYG_08730 | -    | 889640 | 890444 formate-nitrate transporter                           | 267  | P  | 87.7    | 382.6  | 162.4  | 0      |                 |
| SITYG_08740 | -    | 890640 | 892398 putative ABC transporter, ATP-binding protein         | 585  | V  | 108.5   | 987.5  | 228.5  | 3      | alive in vivo   |
| SITYG_08750 | -    | 892387 | 894136 putative multidrug ABC transporter permease/ATPase    | 582  | V  | 125.7   | 490.0  | 241.1  | 0      |                 |
| SITYG_08760 | -    | 894254 | 895790 putative ABC transporter ATPase                       | 511  | R  | 124.2   | 643.8  | 804.1  | 7.0    | 2               |
| SITYG_08770 | -    | 896164 | 896905 ABC transporter, ATP-binding protein                  | 246  | E  | 481.4   | 415.2  | 487.9  | 0      |                 |
| SITYG_08780 | -    | 896904 | 899082 ABC transporter, permease protein                     | 725  | ET | 596.1   | 292.6  | 516.4  | 3      | alive in vivo   |
| SITYG_08790 | uvrB | 899697 | 901686 excinuclease ABC subunit B                            | 662  | L  | 173.1   | 408.8  | 434.2  | 0      |                 |
| SITYG_08800 | -    | 901791 | 902568 hypothetical protein                                  | 258  | -  | 165.5   | 141.4  | 542.8  | 3.6    | 3.2             |
| SITYG_08810 | -    | 902599 | 903097 GNAT family acetyltransferase                         | 165  | KR | 216.6   | 353.0  | 60.5   | -3.3   | -7.0            |
| SITYG_08820 | -    | 903132 | 903684 hypothetical protein                                  | 183  | S  | 172.8   | 238.9  | 36.4   | -4.4   | -7.9            |
| SITYG_08830 | -    | 903786 | 904917 coproporphyrinogen III oxidase                        | 376  | H  | 447.5   | 446.9  | 426.2  | 0      |                 |
| SITYG_08840 | -    | 904920 | 905661 acyl-ACP thioesterase                                 | 246  | I  | 302.3   | 474.5  | 338.8  | 1      | alive in vivo   |
| SITYG_08850 | -    | 905647 | 906274 putative ADP-ribose pyrophosphatase                   | 208  | F  | 628.5   | 630.9  | 848.8  | 1      | alive in vivo   |
| SITYG_08860 |      |        |                                                              |      |    |         |        |        |        |                 |

|             |   |         |         |                                                               |     |      |        |        |        |        |        |   |                 |
|-------------|---|---------|---------|---------------------------------------------------------------|-----|------|--------|--------|--------|--------|--------|---|-----------------|
| SITYG_08990 | - | 922440  | 923400  | glucokinase                                                   | 319 | KG   | 1447.5 | 961.4  | 1380.8 |        |        | 0 |                 |
| SITYG_09000 | - | 922567  | 923897  | 50S ribosomal protein L19                                     | 115 | J    | 1406.6 | 189.4  | 606.0  |        |        | 0 |                 |
| SITYG_09010 | - | 924280  | 925135  | putative DNA adenine methylase                                | 284 | L    | 480.3  | 411.2  | 434.6  |        |        | 2 | vivo-attenuated |
| SITYG_09020 | - | 925138  | 926449  | hypothetical protein                                          | 436 |      | 329.1  | 167.6  | 444.3  |        |        | 2 | alive in vivo   |
| SITYG_09030 | - | 926821  | 926989  | hypothetical protein                                          | 55  | H    | 24.7   | 130.8  | 59.8   |        |        | 0 |                 |
| SITYG_09040 | - | 927411  | 927573  | hypothetical protein                                          | 53  |      | 25.6   | 406.9  | 0.0    |        |        | 0 |                 |
| SITYG_09050 | - | 927990  | 927916  | hypothetical protein                                          | 41  |      | 131.7  | 523.2  | 79.7   |        |        | 0 |                 |
| SITYG_09060 | - | 927932  | 928109  | integrase                                                     | 58  | L    | 70.3   | 124.2  | 0.0    |        |        | 2 | alive in vivo   |
| SITYG_09070 | - | 928267  | 929108  | putative alpha/beta hydrolase                                 | 246 |      | 16.8   | 296.6  | 27.1   |        |        | 0 |                 |
| SITYG_09080 | - | 929495  | 929550  | hypothetical protein                                          | 147 |      | 1401.4 | 346.4  | 655.9  |        |        | 0 |                 |
| SITYG_09090 | - | 930111  | 930786  | two-component response transcriptional regulator              | 224 | TK   | 878.8  | 293.0  | 1011.6 |        |        | 0 |                 |
| SITYG_09100 | - | 930775  | 932122  | putative sensor histidine kinase                              | 448 | T    | 535.8  | 375.2  | 402.6  |        |        | 4 | vivo-attenuated |
| SITYG_09110 | - | 932397  | 933846  | cytoplasmic alpha-amylase                                     | 482 | G    | 111.6  | 409.5  | 187.1  |        |        | 2 | alive in vivo   |
| SITYG_09120 | - | 934215  | 934725  | topology modulation protein                                   | 169 | F    | 97.6   | 344.7  | 177.2  |        |        | 1 | alive in vivo   |
| SITYG_09130 | - | 934789  | 935026  | 30S ribosomal protein S20                                     | 78  | J    | 2327.9 | 0.0    | 1949.1 |        |        | 0 |                 |
| SITYG_09140 | - | 935094  | 936015  | panthothenate kinase                                          | 306 | H    | 85.6   | 71.6   | 21.8   | -3.9   | -3.0   | 0 |                 |
| SITYG_09150 | - | 936116  | 936701  | ribosomal RNA small subunit methyltransferase C               | 194 | J    | 241.1  | 450.8  | 566.5  |        |        | 0 |                 |
| SITYG_09160 | - | 936697  | 937975  | pyrimidine-nucleoside phosphorylase                           | 425 | F    | 162.3  | 292.3  | 322.2  |        |        | 0 |                 |
| SITYG_09170 | - | 937993  | 938656  | deoxyribose-phosphate aldolase                                | 220 | F    | 1989.6 | 1325.8 | 1332.9 |        |        | 0 |                 |
| SITYG_09180 | - | 938642  | 939032  | cytidine deaminase                                            | 129 | F    | 574.4  | 450.8  | 463.5  |        |        | 0 |                 |
| SITYG_09190 | - | 939103  | 940159  | putative lipoprotein                                          | 351 | R    | 3272.2 | 1290.2 | 2215.7 |        |        | 0 |                 |
| SITYG_09200 | - | 940288  | 941824  | ABC transporter, ATP-binding protein                          | 511 | R    | 734.6  | 643.8  | 830.3  |        |        | 0 |                 |
| SITYG_09210 | - | 941816  | 942881  | putative ABC transporter, permease protein                    | 354 | R    | 331.1  | 639.6  | 471.5  |        |        | 0 |                 |
| SITYG_09220 | - | 942882  | 943839  | putative ABC transporter, permease protein                    | 318 | R    | 1339.4 | 574.1  | 1280.2 |        |        | 0 |                 |
| SITYG_09230 | - | 943499  | 944597  | hemolysin III-like membrane protein                           | 215 | R    | 1882.0 | 610.4  | 1456.7 |        |        | 1 | alive in vivo   |
| SITYG_09240 | - | 944580  | 945039  | hypothetical protein                                          | 152 |      | 1699.0 | 335.1  | 1400.2 |        |        | 0 |                 |
| SITYG_09250 | - | 945152  | 945878  | hypothetical protein                                          | 241 | S    | 257.1  | 363.2  | 166.0  |        |        | 0 |                 |
| SITYG_09260 | - | 945927  | 946479  | hypothetical protein                                          | 193 | R    | 285.6  | 199.0  | 436.6  |        |        | 0 |                 |
| SITYG_09270 | - | 946546  | 946992  | transcriptional regulator                                     | 148 | K    | 111.4  | 147.5  | 134.8  |        |        | 0 |                 |
| SITYG_09280 | - | 947139  | 947565  | hypothetical protein                                          | 141 | S    | 973.7  | 515.8  | 495.0  |        |        | 0 |                 |
| SITYG_09290 | - | 947561  | 948743  | aspartate aminotransferase                                    | 393 | E    | 494.8  | 539.1  | 577.7  |        |        | 3 | vivo-attenuated |
| SITYG_09300 | - | 948742  | 949101  | -                                                             |     | E    | 762.6  | 367.3  | 811.2  |        |        | 2 | alive in vivo   |
| SITYG_09310 | - | 949084  | 950476  | asparaginyl-tRNA synthetase                                   | 463 | J    | 1192.0 | 457.8  | 800.8  |        |        | 7 | vivo-attenuated |
| SITYG_09320 | - | 950587  | 951787  | putative transport protein                                    | 399 | QEPR | 131.4  | 402.9  | 393.3  | 3.3    |        | 3 | vivo-attenuated |
| SITYG_09330 | - | 952006  | 952732  | -                                                             |     | ER   | 154.3  | 363.2  | 207.5  |        |        | 1 | alive in vivo   |
| SITYG_09340 | - | 953124  | 953577  | hypothetical protein                                          | 150 | S    | 796.7  | 291.1  | 532.0  |        |        | 0 |                 |
| SITYG_09350 | - | 953679  | 954222  | hypothetical protein                                          | 180 | Q    | 545.4  | 445.2  | 3384.3 |        |        | 0 |                 |
| SITYG_09360 | - | 954588  | 955893  | enolase                                                       | 434 | G    | 5238.5 | 2643.7 | 3070.3 |        |        | 0 |                 |
| SITYG_09370 | - | 955970  | 956714  | NAD-dependent deacetylase                                     | 247 | K    | 200.7  | 443.0  | 566.9  | 3.1    |        | 0 |                 |
| SITYG_09380 | - | 956866  | 957544  | putative satD protein                                         | 225 |      | 183.5  | 291.7  | 370.3  |        |        | 0 |                 |
| SITYG_09390 | - | 957536  | 958268  | putative satE protein                                         | 243 |      | 334.3  | 150.1  | 397.8  |        |        | 0 |                 |
| SITYG_09400 | - | 958526  | 959372  | hypothetical protein                                          | 281 | S    | 858.1  | 441.6  | 569.8  |        |        | 0 |                 |
| SITYG_09410 | - | 959504  | 960089  | putative transcriptional regulator                            | 194 | K    | 78.0   | 112.7  | 51.5   |        |        | 0 |                 |
| SITYG_09420 | - | 960078  | 960573  | putative deoxycytidylate deaminase                            | 164 | F    | 108.9  | 133.2  | 243.4  |        |        | 0 |                 |
| SITYG_09430 | - | 960620  | 961238  | hypothetical protein                                          | 205 | R    | 483.3  | 888.9  | 910.0  |        |        | 1 | alive in vivo   |
| SITYG_09440 | - | 961444  | 961531  | hypothetical protein                                          | 38  |      | 0.0    | 0.0    | 0.0    |        |        | 0 |                 |
| SITYG_09450 | - | 961661  | 962300  | putative glyceral-3-phosphate acyltransferase                 | 215 | S    | 1325.1 | 542.6  | 1177.8 |        |        | 1 | alive in vivo   |
| SITYG_09460 | - | 962481  | 964426  | DNA topoisomerase IV, B subunit                               | 647 | L    | 529.2  | 395.6  | 413.3  |        |        | 0 |                 |
| SITYG_09470 | - | 964443  | 965271  | hypothetical protein                                          | 275 |      | 135.3  | 159.2  | 133.4  |        |        | 1 | alive in vivo   |
| SITYG_09480 | - | 965467  | 966202  | hypothetical protein                                          | 244 |      | 570.0  | 119.6  | 423.5  |        |        | 0 |                 |
| SITYG_09490 | - | 966221  | 967043  | putative streptomycin adenyltransferase                       | 273 |      | 247.3  | 240.6  | 256.5  |        |        | 2 | alive in vivo   |
| SITYG_09500 | - | 967017  | 967131  | hypothetical protein                                          | 37  | J    | 109.2  | 192.8  | 0.0    | -109.2 | -109.8 | 0 |                 |
| SITYG_09510 | - | 967430  | 968869  | DNA topoisomerase IV subunit A                                | 812 | L    | 472.8  | 378.4  | 732.9  |        |        | 0 |                 |
| SITYG_09520 | - | 970012  | 971032  | branched-chain amino acid aminotransferase                    | 339 | EH   | 97.6   | 150.8  | 98.5   |        |        | 0 |                 |
| SITYG_09530 | - | 971135  | 971366  | hypothetical protein                                          | 76  |      | 1382.7 | 95.1   | 869.4  |        |        | 0 |                 |
| SITYG_09540 | - | 971774  | 972974  | 30S ribosomal protein S1                                      | 399 | J    | 2945.2 | 311.3  | 1590.0 |        |        | 1 | vivo-attenuated |
| SITYG_09550 | - | 973252  | 973612  | hypothetical protein                                          | 119 | LR   | 357.2  | 305.2  | 278.9  |        |        | 0 |                 |
| SITYG_09560 | - | 973744  | 974764  | L-lactate dehydrogenase                                       | 339 | C    | 1338.0 | 366.2  | 620.2  |        |        | 0 |                 |
| SITYG_09570 | - | 974926  | 977374  | DNA gyrase subunit A                                          | 815 | L    | 781.2  | 386.0  | 598.9  |        |        | 0 |                 |
| SITYG_09580 | - | 977394  | 978136  | sortase A                                                     | 247 | M    | 457.2  | 472.6  | 377.9  |        |        | 0 |                 |
| SITYG_09590 | - | 978197  | 979541  | pyridine nucleotide-disulfide oxidoreductase                  | 447 | C    | 756.2  | 490.5  | 597.7  |        |        | 0 |                 |
| SITYG_09600 | - | 979757  | 980135  | large conductance mechanosensitive channel protein            | 125 | M    | 3138.6 | 348.8  | 1594.0 |        |        | 0 |                 |
| SITYG_09610 | - | 980295  | 980701  | DNA primase                                                   | 591 | L    | 1076.7 | 254.6  | 644.6  |        |        | 0 |                 |
| SITYG_09620 | - | 980773  | 983188  | RNA polymerase sigma factor RpoD                              | 370 | K    | 1237.4 | 335.6  | 621.0  |        |        | 0 |                 |
| SITYG_09630 | - | 983203  | 983533  | hypothetical protein                                          | 109 | R    | 1433.0 | 199.8  | 1186.8 |        |        | 0 |                 |
| SITYG_09640 | - | 983683  | 985012  | branched-chain amino acid transport system II carrier protein | 442 | E    | 162.3  | 281.1  | 219.1  |        |        | 2 | vivo-attenuated |
| SITYG_09650 | - | 985152  | 985963  | cytochrome C-type biogenesis protein                          | 236 | O    | 40.8   | 432.7  | 155.4  | 4.1    | 3.3    | 0 |                 |
| SITYG_09660 | - | 985879  | 986494  | thiol-disulfide oxidoreductase                                | 194 | OC   | 56.7   | 413.2  | 51.5   |        |        | 1 | alive in vivo   |
| SITYG_09670 | - | 986476  | 987586  | putative peptide methionine sulfoxide reductase               | 369 | O    | 71.0   | 415.7  | 72.4   |        |        | 1 | alive in vivo   |
| SITYG_09680 | - | 987643  | 988378  | putative two-component response transcriptional regulator     | 244 | T    | 237.0  | 418.6  | 382.6  |        |        | 0 |                 |
| SITYG_09690 | - | 988374  | 990084  | putative histidine kinase                                     | 569 | T    | 169.8  | 385.5  | 252.5  |        |        | 2 | vivo-attenuated |
| SITYG_09700 | - | 990111  | 990981  | putative ABC transporter permease                             | 259 | R    | 95.7   | 309.9  | 218.9  |        |        | 6 | vivo-attenuated |
| SITYG_09710 | - | 990893  | 991673  | putative ABC transporter permease                             | 259 | R    | 164.9  | 535.3  | 553.6  | 3.7    |        | 1 | alive in vivo   |
| SITYG_09720 | - | 991665  | 992649  | ABC transporter, ATP-binding protein                          | 327 | R    | 118.0  | 357.3  | 173.5  |        |        | 1 | alive in vivo   |
| SITYG_09730 | - | 992798  | 994043  | oxidoreductase                                                | 414 | R    | 223.2  | 476.6  | 290.4  |        |        | 2 | vivo-attenuated |
| SITYG_09740 | - | 994058  | 994667  | flavin reductase                                              | 202 | R    | 149.9  | 288.7  | 263.8  |        |        | 1 | alive in vivo   |
| SITYG_09750 | - | 994686  | 995616  | thiamine biosynthesis                                         | 309 | H    | 240.9  | 496.2  | 388.7  |        |        | 1 | alive in vivo   |
| SITYG_09760 | - | 995913  | 997287  | NADH oxidase                                                  | 457 | R    | 256.6  | 207.9  | 372.7  |        |        | 2 | alive in vivo   |
| SITYG_09770 | - | 997427  | 999887  | voltage-gated chloride channel family protein                 | 519 | P    | 186.1  | 493.0  | 392.7  |        |        | 3 | alive in vivo   |
| SITYG_09780 | - | 999100  | 999877  | hypothetical protein                                          | 258 |      | 160.2  | 311.1  | 232.6  |        |        | 0 |                 |
| SITYG_09790 | - | 999876  | 1001061 | hypothetical protein                                          | 394 |      | 259.0  | 482.1  | 449.1  |        |        | 1 | alive in vivo   |
| SITYG_09800 | - | 1001441 | 1002426 | guanosine monophosphate reductase                             | 327 | F    | 307.7  | 179.7  | 255.1  |        |        | 0 |                 |
| SITYG_09810 | - | 1002512 | 1003194 | xanthine phosphoribosyltransferase                            | 193 | F    | 92.7   | 264.3  | 362.3  | 4.3    |        | 0 |                 |
| SITYG_09820 | - | 1003193 | 1004450 | xanthine permease                                             | 421 | F    | 91.7   | 399.2  | 214.2  |        |        | 2 | alive in vivo   |
| SITYG_09830 | - | 1004556 | 1005894 | matE efflux family protein                                    | 445 | V    | 136.4  | 377.7  | 525.4  | 4.2    |        | 0 |                 |
| SITYG_09840 | - | 1005970 | 1006153 | 4-oxalocrotonate tautomerase                                  | 60  | R    | 181.3  | 360.2  | 1097.5 | 6.6    |        | 0 |                 |
| SITYG_09850 | - | 1006275 | 1006881 | thymidine kinase                                              | 201 | F    | 492.9  | 580.2  | 447.4  |        |        | 0 |                 |
| SITYG_09860 | - | 1006877 | 1007957 | peptide chain release factor 1                                | 359 | J    | 541.6  | 284.9  | 455.6  |        |        | 0 |                 |
| SITYG_09870 | - | 1007956 | 1008787 | HemK protein                                                  | 276 | J    | 414.3  | 396.7  | 386.7  |        |        | 1 | alive in vivo   |
| SITYG_09880 | - | 1008779 | 1009382 | putative translation factor                                   | 200 | J    | 557.2  | 364.4  | 549.6  |        |        | 1 | alive in vivo   |
| SITYG_09890 | - | 1009388 | 1010675 | serine hydroxymethyltransferase                               | 428 | E    | 222.4  | 239.0  | 234.1  |        |        | 0 |                 |
| SITYG_09900 | - | 1010676 | 1011651 | hypothetical protein                                          | 324 |      | 234.0  | 563.5  | 206.0  |        |        | 1 | vivo-attenuated |
| SITYG_09910 | - | 1011654 | 1012257 | putative PvaA-like protein                                    | 200 | M    | 316.4  | 291.5  | 333.1  |        |        | 0 |                 |
| SITYG_09920 | - | 1012368 | 1013217 | hydrolase                                                     | 282 | R    | 1895.7 | 258.8  | 1277.4 |        |        | 1 | vivo-attenuated |
| SITYG_09930 | - | 1013544 | 1015104 | GntR family transcriptional regulator                         | 519 | F    | 406.8  | 295.8  | 405.5  |        |        | 0 |                 |
| SITYG_09940 | - | 1015245 | 1015944 | hypothetical protein                                          | 232 | K    | 290.8  | 125.7  | 215.0  |        |        | 0 |                 |
| SITYG_09950 | - | 1016059 | 1016392 | hypothetical protein                                          | 110 | S    | 759.9  | 264.0  | 542.8  |        |        | 3 | vivo-attenuated |
| SITYG_09960 | - | 1016452 | 1018027 | signal recognition particle protein                           | 524 | U    | 553.1  | 306.9  | 497.3  |        |        | 0 |                 |
| SITYG_09970 | - | 1018222 | 1019293 | tyrosine recombinase XerC                                     | 356 | L    | 263.4  | 615.5  | 346.9  |        |        | 1 | vivo-attenuated |
| SITYG_09980 | - | 1019785 | 1020946 | hypothetical protein                                          | 386 |      | 35.7   | 151.4  | 224.9  | 6.9    |        | 1 | alive in vivo   |
| SITYG_09990 | - | 1020973 | 1021714 | putative esterase                                             | 246 | S    | 85.0   | 207.6  | 176.2  | 3.4    |        | 1 | alive in vivo   |
| SITYG_10000 | - | 1021732 | 1022581 | putative esterase                                             | 282 | R    | 122.1  | 465.9  | 260.2  |        |        | 0 |                 |
| SITYG_10010 | - | 1022663 | 1023998 | rRNA:M(S)U-54 methyltransferase                               | 444 | J    | 186.4  | 329.2  | 293.4  |        |        | 0 |                 |
| SITYG_10020 | - | 1024091 |         |                                                               |     |      |        |        |        |        |        |   |                 |



|             |             |         |         |                                                              |      |      |         |        |        |         |                 |
|-------------|-------------|---------|---------|--------------------------------------------------------------|------|------|---------|--------|--------|---------|-----------------|
| SITYG_10280 | -           | 1037617 | 1039666 | hypothetical protein                                         | 682  |      | 477.8   | 450.4  | 485.2  | 3       | alive in vivo   |
| SITYG_10290 | -           | 1038649 | 1040297 | hypothetical protein                                         | 215  |      | 531.3   | 406.9  | 418.4  | 1       | alive in vivo   |
| SITYG_10300 | -           | 1040365 | 1040656 | hypothetical protein                                         | 96   |      | 1126.1  | 151.0  | 931.7  | 0       |                 |
| SITYG_10310 | -           | 1040670 | 1041078 | hypothetical protein                                         | 135  | O    | 630.4   | 269.3  | 541.5  | 0       |                 |
| SITYG_10320 | -           | 1041186 | 1041954 | ribonuclease HI                                              | 255  | L    | 237.7   | 372.0  | 209.2  | 2       | alive in vivo   |
| SITYG_10330 | -           | 1041940 | 1042792 | ribosome biogenesis GTP-binding protein YlgF                 | 283  | R    | 467.4   | 515.8  | 400.7  | 0       |                 |
| SITYG_10340 | <i>rpsU</i> | 1043196 | 1043373 | 30S ribosomal protein S21                                    | 58   | J    | 1101.5  | 124.2  | 794.3  | 1       | vivo-attenuated |
| SITYG_10350 | -           | 1043521 | 1043860 | putative ribonucleotide reductase                            | 112  |      | 1272.6  | 194.5  | 977.5  | 0       |                 |
| SITYG_10360 | -           | 1044108 | 1046397 | putative cell wall anchor protein                            | 762  | D    | 592.6   | 460.8  | 583.5  | 0       |                 |
| SITYG_10370 | -           | 1046397 | 1047903 | putative transcriptional regulator                           | 423  | KE   | 150.0   | 329.2  | 276.3  | 0       |                 |
| SITYG_10380 | -           | 1047932 | 1048675 | ABC transporter, ATP-binding protein                         | 580  | V    | 152.3   | 416.0  | 236.2  | 2       | vivo-attenuated |
| SITYG_10390 | -           | 1049674 | 1051417 | ABC transporter, permease/ATP-binding protein                | 580  | V    | 169.0   | 327.8  | 190.1  | 1       | alive in vivo   |
| SITYG_10400 | -           | 1051512 | 1052184 | hypothetical protein                                         | 223  | S    | 253.1   | 425.1  | 254.0  | 0       |                 |
| SITYG_10410 | <i>cutC</i> | 1052196 | 1052829 | copper homeostasis protein CutC                              | 210  | P    | 347.3   | 416.6  | 618.7  | 0       |                 |
| SITYG_10420 | -           | 1052884 | 1053738 |                                                              |      | M    | 97.1    | 360.2  | 352.8  | 4.0     |                 |
| SITYG_10430 | -           | 1053880 | 1054405 | hypothetical protein                                         | 174  |      | 31.6    | 251.1  | 57.4   | 4       | vivo-attenuated |
| SITYG_10440 | -           | 1054443 | 1054953 | putative transcriptional regulator                           | 169  | R    | 276.5   | 344.7  | 590.7  | 0       |                 |
| SITYG_10450 | -           | 1055011 | 1055251 | RNA-binding protein                                          | 79   | R    | 414.8   | 91.6   | 251.0  | 0       |                 |
| SITYG_10460 | <i>rpsP</i> | 1055269 | 1055542 | 30S ribosomal protein S16                                    | 90   | J    | 10195.7 | 80.5   | 5112.9 | 0       |                 |
| SITYG_10470 | -           | 1055658 | 1057962 | pullulanase                                                  | 767  | G    | 507.7   | 648.6  | 710.4  | 0       |                 |
| SITYG_10480 | -           | 1057972 | 1058932 | lipid kinase                                                 | 319  | IR   | 358.6   | 343.4  | 334.7  | 2       | vivo-attenuated |
| SITYG_10490 | <i>ligA</i> | 1058940 | 1060899 | NAD-dependent DNA ligase                                     | 652  | L    | 228.7   | 302.9  | 405.0  | 0       |                 |
| SITYG_10500 | -           | 1061203 | 1062151 | 2-dehydropanoate 2-reductase                                 | 315  | H    | 1479.0  | 602.7  | 1313.5 | 0       |                 |
| SITYG_10510 | -           | 1062175 | 1063225 | putative membrane protein, putative toxin regulator          | 349  | R    | 158.0   | 272.1  | 325.2  | 1       | alive in vivo   |
| SITYG_10520 | -           | 1063281 | 1063791 | putative transporter                                         | 169  | S    | 593.8   | 430.9  | 413.5  | 0       |                 |
| SITYG_10530 | -           | 1063926 | 1064370 | GtrA family protein                                          | 147  | S    | 65.4    | 247.5  | 248.8  | 4.1     |                 |
| SITYG_10540 | -           | 1065110 | 1065818 | hypothetical protein                                         | 235  | S    | 298.8   | 527.6  | 638.3  | 2       | vivo-attenuated |
| SITYG_10550 | -           | 1065828 | 1066278 | transcriptional regulator                                    | 149  | K    | 110.6   | 360.7  | 333.9  | 2       | vivo-attenuated |
| SITYG_10560 | -           | 1066347 | 1067256 | putative ribonuclease BN                                     | 302  | S    | 146.0   | 217.6  | 563.4  | 4.2     | vivo-attenuated |
| SITYG_10570 | <i>map</i>  | 1067306 | 1068184 | methionine aminopeptidase                                    | 285  | J    | 1087.8  | 717.1  | 1439.6 | 0       |                 |
| SITYG_10580 | -           | 1068188 | 1069466 | hypothetical protein                                         | 425  | K    | 240.2   | 240.7  | 157.2  | 0       |                 |
| SITYG_10590 | -           | 1069458 | 1070010 | acetyltransferase                                            | 183  | J    | 864.2   | 318.5  | 654.9  | 2       | vivo-attenuated |
| SITYG_10600 | -           | 1070088 | 1071348 | UDP-N-acetylglucosamine 1-carboxyvinyltransferase            | 419  | M    | 859.3   | 366.2  | 733.2  | 7       | vivo-attenuated |
| SITYG_10610 | <i>metK</i> | 1071683 | 1072874 | S-adenosylmethionine synthetase                              | 396  | H    | 365.7   | 627.3  | 489.0  | 0       |                 |
| SITYG_10620 | <i>pyrC</i> | 1073139 | 1074414 | dihydroorotase                                               | 424  | F    | 211.5   | 224.1  | 307.2  | 1       | vivo-attenuated |
| SITYG_10630 | <i>mutX</i> | 1074425 | 1074896 | mutator mutT protein                                         | 156  | LR   | 660.5   | 513.2  | 298.5  | 0       |                 |
| SITYG_10640 | <i>ung</i>  | 1074922 | 1075576 | uracil-DNA glycosylase                                       | 217  | L    | 380.6   | 302.4  | 276.4  | 0       |                 |
| SITYG_10650 | -           | 1075600 | 1076587 | oxidoreductase, NAD-binding domain protein                   | 328  | R    | 479.1   | 334.0  | 468.0  | 0       |                 |
| SITYG_10660 | -           | 1077026 | 1077740 | hypothetical protein                                         | 237  | S    | 2318.1  | 338.5  | 2700.4 | 0       |                 |
| SITYG_10670 | -           | 1077817 | 1080052 | competence protein                                           | 744  | R    | 52.0    | 383.5  | 260.6  | 5.5     | vivo-attenuated |
| SITYG_10680 | -           | 1080035 | 1080740 | competence protein ComEA                                     | 234  | L    | 17.7    | 187.0  | 71.2   | 4.4     | -3.1            |
| SITYG_10690 | -           | 1080711 | 1080834 | hypothetical protein                                         | 40   |      | 0.0     | 0.0    | 0.0    | 0       |                 |
| SITYG_10700 | <i>smfB</i> | 1080907 | 1081375 | SsrA-binding protein                                         | 155  | O    | 647.0   | 93.9   | 643.7  | 0       |                 |
| SITYG_10710 | <i>vacB</i> | 1081337 | 1083677 | ribonuclease R                                               | 779  | K    | 489.3   | 422.6  | 484.9  | 5       | vivo-attenuated |
| SITYG_10720 | <i>secE</i> | 1083767 | 1084001 | putative protein translocase subunit SecG                    | 77   | U    | 620.5   | 93.9   | 386.2  | 0       |                 |
| SITYG_10730 | -           | 1084060 | 1084179 | hypothetical protein                                         | 42   |      | 52.2    | 0.0    | 0.0    | 1       | alive in vivo   |
| SITYG_10740 | -           | 1084409 | 1085717 | hypothetical protein                                         | 435  |      | 101.5   | 252.0  | 307.1  | 3.3     | vivo-attenuated |
| SITYG_10750 | -           | 1085857 | 1086190 | hypothetical protein                                         | 110  |      | 224.2   | 461.9  | 422.1  | 1       | alive in vivo   |
| SITYG_10760 | -           | 1086205 | 1086457 | hypothetical protein                                         | 83   |      | 197.5   | 348.8  | 358.6  | 0       |                 |
| SITYG_10770 | -           | 1086524 | 1087343 | hypothetical protein                                         | 272  | D    | 136.8   | 1100.1 | 355.6  | 1       | alive in vivo   |
| SITYG_10780 | -           | 1087535 | 1088120 | hypothetical protein                                         | 194  |      | 99.3    | 488.3  | 120.2  | 1       | vivo-attenuated |
| SITYG_10790 | -           | 1088143 | 1089472 | hypothetical protein                                         | 442  | NU   | 87.4    | 463.0  | 272.0  | 3.4     | vivo-attenuated |
| SITYG_10800 | -           | 1089487 | 1089760 | hypothetical protein                                         | 90   |      | 15.2    | 161.0  | 36.8   | 1       | alive in vivo   |
| SITYG_10810 | -           | 1089790 | 1090348 | hypothetical protein                                         | 195  | K    | 74.3    | 630.1  | 323.9  | 4.7     | vivo-attenuated |
| SITYG_10820 | -           | 1090359 | 1092309 | hypothetical protein                                         | 649  |      | 42.5    | 304.3  | 159.6  | 4.1     | alive in vivo   |
| SITYG_10830 | -           | 1092320 | 1092971 | hypothetical protein                                         | 216  |      | 31.9    | 270.0  | 77.1   | 2       | vivo-attenuated |
| SITYG_10840 | -           | 1092970 | 1093279 | hypothetical protein                                         | 102  |      | 120.8   | 497.8  | 162.5  | 0       |                 |
| SITYG_10850 | -           | 1093443 | 1093725 | hypothetical protein                                         | 93   | L    | 0.0     | 155.8  | 71.2   | 0       |                 |
| SITYG_10860 | -           | 1093729 | 1095859 | putative membrane protein                                    | 709  | U    | 70.1    | 484.9  | 386.6  | 6.0     | vivo-attenuated |
| SITYG_10870 | -           | 1095975 | 1096461 | hypothetical protein                                         | 161  |      | 1246.2  | 316.5  | 640.5  | 1       | alive in vivo   |
| SITYG_10880 | -           | 1096585 | 1099735 | putative conjugal transfer protein TraG                      | 1049 |      | 101.4   | 690.6  | 325.2  | 3.5     | vivo-attenuated |
| SITYG_10890 | -           | 1099718 | 1099982 | hypothetical protein                                         | 87   |      | 31.4    | 249.7  | 38.0   | 7       | vivo-attenuated |
| SITYG_10900 | -           | 1100243 | 1100966 | putative single-stranded DNA-binding protein                 | 140  |      | 49.0    | 103.9  | 308.6  | 6.8     | vivo-attenuated |
| SITYG_10910 | -           | 1100967 | 1102069 | putative glucan-binding protein                              | 733  |      | 96.1    | 289.4  | 337.5  | 3.8     | vivo-attenuated |
| SITYG_10920 | -           | 1102894 | 1102671 | putative cell wall anchor protein                            | 258  | L    | 69.4    | 254.5  | 142.2  | 3       | vivo-attenuated |
| SITYG_10930 | -           | 1103689 | 1104757 | hypothetical protein                                         | 355  |      | 66.0    | 267.5  | 94.0   | 0       |                 |
| SITYG_10940 | -           | 1104770 | 1105118 | hypothetical protein                                         | 115  |      | 357.6   | 588.3  | 259.7  | 1       | alive in vivo   |
| SITYG_10950 | -           | 1105218 | 1107054 | putative ATP-dependent Clp protease ATP-binding protein      | 611  | O    | 81.3    | 825.8  | 235.2  | 3.1     | -4.2            |
| SITYG_10960 | -           | 1107050 | 1108085 | DNA topoisomerase                                            | 584  | L    | 118.2   | 450.8  | 354.8  | 3.3     | vivo-attenuated |
| SITYG_10970 | -           | 1108044 | 1108945 | hypothetical protein                                         | 46   |      | 0.0     | 155.8  | 71.2   | 0       |                 |
| SITYG_10980 | -           | 1108915 | 1113055 | hypothetical protein                                         | 1379 |      | 82.2    | 504.2  | 553.0  | 7.3     | vivo-attenuated |
| SITYG_10990 | -           | 1113075 | 1113336 | hypothetical protein                                         | 86   |      | 31.8    | 84.2   | 38.5   | 1       | alive in vivo   |
| SITYG_11000 | -           | 1113472 | 1113847 | hypothetical protein                                         | 124  |      | 143.8   | 644.6  | 669.5  | 5.1     | vivo-attenuated |
| SITYG_11010 | -           | 1113873 | 1114389 | hypothetical protein                                         | 171  |      | 72.4    | 425.9  | 97.3   | 3       | vivo-attenuated |
| SITYG_11020 | -           | 1114696 | 1117051 | hypothetical protein                                         | 784  |      | 44.0    | 186.6  | 149.2  | 3.7     | vivo-attenuated |
| SITYG_11030 | -           | 1117062 | 1117521 | hypothetical protein                                         | 152  |      | 63.3    | 287.3  | 196.9  | 3.4     | vivo-attenuated |
| SITYG_11040 | -           | 1117542 | 1118328 | putative endonuclease                                        | 261  |      | 121.4   | 475.3  | 383.3  | 3.4     | alive in vivo   |
| SITYG_11050 | -           | 1118343 | 1118676 | hypothetical protein                                         | 110  | RTLK | 0.0     | 329.9  | 90.5   | 0       |                 |
| SITYG_11060 | -           | 1118668 | 1118986 | hypothetical protein                                         | 105  |      | 13.0    | 69.1   | 0.0    | 0       |                 |
| SITYG_11070 | -           | 1119430 | 1119745 | hypothetical protein                                         | 104  |      | 65.8    | 698.8  | 311.9  | 0       |                 |
| SITYG_11080 | -           | 1119806 | 1120740 | putative membrane protein                                    | 277  |      | 139.3   | 553.3  | 493.7  | 3.9     | alive in vivo   |
| SITYG_11090 | -           | 1120951 | 1121865 | hypothetical protein                                         | 299  |      | 36.8    | 260.1  | 91.9   | 2       | alive in vivo   |
| SITYG_11100 | -           | 1121861 | 1122071 | hypothetical protein                                         | 69   |      | 19.8    | 418.6  | 47.8   | 2       | vivo-attenuated |
| SITYG_11110 | -           | 1122063 | 1122489 | hypothetical protein                                         | 141  | OC   | 19.5    | 51.6   | 165.0  | 9.2     | vivo-attenuated |
| SITYG_11120 | -           | 1122475 | 1122907 | hypothetical protein                                         | 143  |      | 28.8    | 50.9   | 186.0  | 7.0     | alive in vivo   |
| SITYG_11130 | -           | 1122922 | 1123126 | hypothetical protein                                         | 67   |      | 40.7    | 323.2  | 344.6  | 8.2     | alive in vivo   |
| SITYG_11140 | -           | 1123122 | 1123674 | putative membrane protein                                    | 183  |      | 90.2    | 398.1  | 382.0  | 4.6     | alive in vivo   |
| SITYG_11150 | -           | 1123689 | 1124736 | putative C-5 cytosine methyltransferase                      | 348  | L    | 79.2    | 251.9  | 249.4  | 3.4     | alive in vivo   |
| SITYG_11160 | -           | 1124744 | 1125536 | putative D12 class N6 adenine-specific DNA methyltransferase | 263  | L    | 83.8    | 443.9  | 393.1  | 5.1     | alive in vivo   |
| SITYG_11170 | -           | 1125544 | 1125733 | hypothetical protein                                         | 62   |      | 87.8    | 0.0    | 0.0    | 1       | alive in vivo   |
| SITYG_11180 | -           | 1125843 | 1127340 | hypothetical protein                                         | 498  |      | 97.0    | 778.0  | 127.5  | 1       | alive in vivo   |
| SITYG_11190 | -           | 1127330 | 1127840 | hypothetical protein                                         | 169  |      | 0.0     | 86.2   | 275.7  | #DIV/0! | 0               |
| SITYG_11200 | -           | 1128040 | 1128190 | 50S ribosomal protein L33                                    | 49   | J    | 27.7    | 146.5  | 66.9   | 1       | alive in vivo   |
| SITYG_11210 | -           | 1128173 | 1129319 | multidrug transporter                                        | 381  | QEP  | 325.8   | 479.4  | 595.9  | 1       | alive in vivo   |
| SITYG_11220 | <i>coaE</i> | 1129395 | 1129989 | dephospho-CoA kinase                                         | 197  | H    | 384.1   | 296.0  | 456.5  | 0       |                 |
| SITYG_11230 | <i>mutM</i> | 1129992 | 1130817 | formamidopyrimidine-DNA glycosylase                          | 274  | L    | 266.5   | 532.7  | 596.4  | 0       |                 |
| SITYG_11240 | -           | 1130954 | 1131395 | hypothetical protein                                         | 146  |      | 94.1    | 299.0  | 250.5  | 0       |                 |
| SITYG_11250 | -           | 1131438 | 1131915 | phosphohydrolase                                             | 158  | LR   | 426.1   | 414.6  | 231.6  | 0       |                 |
| SITYG_11260 | -           | 1131975 | 1132350 | putative competence protein                                  | 124  |      | 354.0   | 468.8  | 214.2  | 3       | vivo-attenuated |
| SITYG_11270 | <i>era</i>  | 1132398 | 1132698 | GTP-binding protein Era                                      | 299  | R    | 709.8   | 756.9  | 513.3  | 0       |                 |
| SITYG_11280 | -           | 1132657 | 1132762 | dialcylglycerol kinase                                       | 134  | M    | 204.8   | 379.8  | 223.2  | 0       |                 |
| SITYG_11290 | -           | 1133742 | 1134240 | hypothetical protein                                         | 165  | R    | 791.3   | 529.5  | 927.6  | 0       |                 |
| SITYG_11300 | -           | 1134558 | 1136095 | ABC-type transport system, ATPase and permease component     | 578  | V    | 114.6   | 318.3  | 196.6  | 1       | alive in vivo   |
| SITYG_11310 | -           | 1136091 | 1137822 | ABC-type transport system, ATPase and permease component     | 576  | V    | 117.4   | 304.7  | 272.7  | 2       | alive in vivo   |
| SITYG_11320 | -           | 1138030 | 1138198 | hypothetical protein                                         | 55   | C    | 24.7    | 0.0    | 0.0    | 0       |                 |
| SITYG_11330 | -           | 1138318 | 1138450 | hypothetical protein                                         | 43   |      | 0.0     | 166.5  | 0.0    | 0       |                 |
| SITYG_11340 | -           | 1139071 | 1139638 | acetyltransferase                                            | 188  | J    | 512.1   | 465.1  | 336.5  | 0       |                 |
| SITYG_11350 | <i>ald</i>  | 1139767 | 1140880 | alanine dehydrogenase                                        | 370  | E    | 879.6   | 691.0  | 848.1  | 3       | vivo-attenuated |
| SITYG_11360 | -           | 1141096 | 1141417 | TfoX N-terminal domain protein                               | 106  | K    | 749.5   |        |        |         |                 |

|             |             |         |                                                             |     |       |         |         |        |      |                 |
|-------------|-------------|---------|-------------------------------------------------------------|-----|-------|---------|---------|--------|------|-----------------|
| SITYG_11570 | -           | 1159785 | 1161267 galactose-1-phosphate-uridylyltransferase           | 493 | G     | 70.0    | 385.5   | 88.1   | 0    |                 |
| SITYG_11580 | <i>galK</i> | 1161339 | 1162518 galactokinase                                       | 392 | G     | 158.3   | 391.4   | 238.5  | 1    | alive in vivo   |
| SITYG_11590 | <i>galR</i> | 1162755 | 1163757 galactose operon transcriptional regulator GalR     | 333 | K     | 414.0   | 636.0   | 972.1  | 2    | alive in vivo   |
| SITYG_11600 | -           | 1163759 | 1164695 biotin-(acetyl-CoA-carboxylase) ligase              | 311 | H     | 208.3   | 375.6   | 375.5  | 1    | vivo-attenuated |
| SITYG_11610 | -           | 1164842 | 1164965 hypothetical protein                                | 40  |       | 0.0     | 0.0     | 0.0    | 2    | alive in vivo   |
| SITYG_11620 | -           | 1165156 | 1165813 hypothetical protein                                | 218 | S     | 202.0   | 301.0   | 275.1  | 0    |                 |
| SITYG_11630 | -           | 1165816 | 1166491 hypothetical protein                                | 224 | S     | 971.0   | 293.0   | 490.9  | 1    | vivo-attenuated |
| SITYG_11640 | -           | 1166637 | 1166926 putative dipeptidase                                | 462 | E     | 74.7    | 522.1   | 115.7  | 2    | alive in vivo   |
| SITYG_11650 | -           | 1168093 | 1169233 cystathionine beta-lyase                            | 379 | E     | 94.6    | 462.6   | 475.7  | 6.9  |                 |
| SITYG_11660 | -           | 1169239 | 1168613 putative endoribonuclease LPSP                      | 127 | J     | 64.8    | 572.3   | 653.8  | 11.0 |                 |
| SITYG_11670 | -           | 1169620 | 1171009 putative amino acid permease                        | 459 | E     | 75.1    | 636.0   | 356.6  | 6.2  |                 |
| SITYG_11680 | -           | 1171016 | 1171781 glutamine amidotransferase                          | 254 | R     | 81.3    | 258.5   | 354.4  | 4.7  |                 |
| SITYG_11690 | -           | 1172004 | 1173668 DNA polymerase III subunits gamma and tau           | 554 | L     | 637.8   | 343.1   | 373.9  | 0    |                 |
| SITYG_11700 | -           | 1173668 | 1174286 GAF domain-containing protein                       | 205 | T     | 349.0   | 426.7   | 552.5  | 0    |                 |
| SITYG_11710 | -           | 1174313 | 1174943 putative SAM-dependent methyltransferases           | 209 | QR    | 105.4   | 348.8   | 302.9  | 3.1  |                 |
| SITYG_11720 | -           | 1174939 | 1175566 hypothetical protein                                | 208 |       | 145.5   | 175.2   | 96.1   | 1    | alive in vivo   |
| SITYG_11730 | -           | 1175881 | 1178455 histidine triad protein                             | 857 |       | 557.6   | 563.5   | 737.3  | 1    | alive in vivo   |
| SITYG_11740 | -           | 1178465 | 1179389 metal binding lipoprotein                           | 307 | P     | 422.0   | 404.3   | 728.2  | 1    | vivo-attenuated |
| SITYG_11750 | <i>trmD</i> | 1179508 | 1180243 tRNA (Guanine-N(1))-methyltransferase               | 244 | J     | 496.7   | 209.3   | 464.5  | 0    |                 |
| SITYG_11760 | <i>rimM</i> | 1180232 | 1180751 16S rRNA processing protein RimM                    | 172 | J     | 591.5   | 254.0   | 328.9  | 0    |                 |
| SITYG_11770 | -           | 1180990 | 1182565 ABC transporter, ATP-binding protein                | 524 | V     | 263.4   | 320.9   | 312.4  | 1    | alive in vivo   |
| SITYG_11780 | -           | 1182724 | 1182874 hypothetical protein                                | 49  |       | 0.0     | 146.5   | 0.0    | 0    |                 |
| SITYG_11790 | -           | 1182870 | 1183032 hypothetical protein                                | 53  |       | 128.0   | 406.9   | 743.9  | 8.3  |                 |
| SITYG_11800 | <i>rplL</i> | 1183346 | 1183715 50S ribosomal protein L7/L12                        | 122 | J     | 19290.7 | 1905.7  | 7565.5 | 0    |                 |
| SITYG_11810 | <i>rplU</i> | 1183786 | 1184287 50S ribosomal protein L10                           | 166 | J     | 3278.8  | 87.7    | 2064.5 | 0    |                 |
| SITYG_11820 | -           | 1184614 | 1185457 AraC family transcriptional regulator               | 280 | S     | 172.2   | 495.3   | 321.6  | 1    | alive in vivo   |
| SITYG_11830 | -           | 1185544 | 1186471 putative NipCp60-like transpeptidase                | 308 |       | 44.7    | 474.1   | 108.3  | 1    | alive in vivo   |
| SITYG_11840 | -           | 1186985 | 1187345 hypothetical protein                                | 149 |       | 285.8   | 244.2   | 89.3   | 0    |                 |
| SITYG_11850 | <i>dcpA</i> | 1187547 | 1188420 dityrosylsuccinate synthase                         | 293 | EM    | 32.9    | 473.4   | 125.2  | 4.1  | 6.4             |
| SITYG_11860 | <i>asd</i>  | 1188474 | 1189651 aspartate-semialdehyde dehydrogenase                | 358 | E     | 104.0   | 530.5   | 317.0  | 3.3  |                 |
| SITYG_11870 | -           | 1189685 | 1189685 hypothetical protein                                | 59  |       | 0.0     | 0.0     | 0.0    | 0    |                 |
| SITYG_11880 | <i>potD</i> | 1189931 | 1191002 spermidine/putrescine-binding periplasmic protein   | 356 | E     | 546.1   | 492.4   | 581.3  | 0    |                 |
| SITYG_11890 | <i>potC</i> | 1190998 | 1191772 ABC transporter, permease protein                   | 257 | E     | 268.0   | 369.1   | 181.6  | 0    |                 |
| SITYG_11900 | <i>potB</i> | 1191768 | 1192575 ABC transporter, permease protein                   | 268 | E     | 313.6   | 626.3   | 224.0  | 0    |                 |
| SITYG_11910 | <i>potA</i> | 1192555 | 1193713 spermidine/putrescine transport ATP-binding protein | 385 | E     | 465.7   | 436.5   | 485.6  | 1    | alive in vivo   |
| SITYG_11920 | -           | 1193705 | 1193822 hypothetical protein                                | 38  |       | 35.5    | 0.0     | 85.8   | 0    |                 |
| SITYG_11930 | <i>murB</i> | 1193808 | 1194711 UDP-N-acetylenolpyruvylglucosamine reductase        | 300 | M     | 266.4   | 413.7   | 355.9  | 0    |                 |
| SITYG_11940 | -           | 1195106 | 1195199 hypothetical protein                                | 30  |       | 0.0     | 0.0     | 0.0    | 0    |                 |
| SITYG_11950 | <i>lepA</i> | 1195430 | 1197254 GTP-binding protein LepA                            | 607 | M     | 514.0   | 421.7   | 600.1  | 0    |                 |
| SITYG_11960 | -           | 1197198 | 1198206 putative hydrolase                                  | 335 | R     | 218.1   | 370.6   | 288.9  | 0    |                 |
| SITYG_11970 | <i>hemH</i> | 1198811 | 1199099 ferroxidase                                         | 365 | H     | 222.9   | 420.3   | 365.8  | 0    |                 |
| SITYG_11980 | -           | 1200040 | 1200160 hypothetical protein                                | 39  |       | 0.0     | 183.1   | 0.0    | 1    | vivo-attenuated |
| SITYG_11990 | <i>pepT</i> | 1200284 | 1201508 peptidase T                                         | 407 | E     | 267.7   | 430.9   | 172.3  | 0    |                 |
| SITYG_12000 | <i>udk</i>  | 1201996 | 1202632 uridine kinase                                      | 211 | F     | 423.9   | 483.7   | 805.3  | 0    |                 |
| SITYG_12010 | -           | 1202736 | 1203726 oxidoreductase                                      | 329 | R     | 192.7   | 554.9   | 192.7  | 0    |                 |
| SITYG_12020 | -           | 1203712 | 1204786 DEAD/DEAH box helicase                              | 361 | LKJ   | 156.6   | 445.2   | 277.4  | 0    |                 |
| SITYG_12030 | -           | 1204889 | 1206217 putative polysaccharide deacetylase                 | 455 | G     | 430.6   | 353.4   | 399.7  | 0    |                 |
| SITYG_12040 | <i>lglL</i> | 1206448 | 1206835 lactoylglutathione lyase                            | 128 | E     | 1339.8  | 397.5   | 726.6  | 3    | alive in vivo   |
| SITYG_12050 | <i>rplT</i> | 1207114 | 1207474 50S ribosomal protein L20                           | 119 | J     | 1624.7  | 244.2   | 1087.9 | 0    |                 |
| SITYG_12060 | <i>rplM</i> | 1207520 | 1207721 50S ribosomal protein L35                           | 66  | J     | 6098.2  | 656.0   | 3946.8 | 0    |                 |
| SITYG_12070 | -           | 1207754 | 1208312 translation initiation factor IF-3                  | 185 | J     | 2460.7  | 275.7   | 2285.5 | 0    |                 |
| SITYG_12080 | -           | 1208456 | 1209134 cytidylate kinase                                   | 225 | F     | 1168.6  | 1102.0  | 1022.0 | 0    |                 |
| SITYG_12090 | -           | 1209143 | 1209596 hypothetical protein                                | 150 |       | 750.9   | 339.6   | 620.7  | 0    |                 |
| SITYG_12100 | -           | 1209635 | 1209839 putative Ferredoxin                                 | 67  | C     | 935.4   | 107.7   | 246.1  | 3.5  |                 |
| SITYG_12110 | -           | 1209825 | 1210320 hypothetical protein                                | 164 |       | 335.2   | 355.1   | 527.5  | 0    |                 |
| SITYG_12120 | -           | 1210535 | 1211648 glyceraldehyde kinase                               | 370 | G     | 96.9    | 335.6   | 261.7  | 0    |                 |
| SITYG_12130 | <i>serB</i> | 1211651 | 1212302 phosphoserine phosphatase SerB                      | 216 | E     | 133.8   | 168.8   | 169.7  | 2    | vivo-attenuated |
| SITYG_12140 | <i>glmM</i> | 1212408 | 1213761 phosphoglucosamine mutase                           | 450 | G     | 1542.2  | 779.6   | 1699.6 | 0    |                 |
| SITYG_12150 | -           | 1213785 | 1214514 hypothetical protein                                | 242 | S     | 506.4   | 361.7   | 537.2  | 0    |                 |
| SITYG_12160 | -           | 1214500 | 1215358 hypothetical protein                                | 285 | S     | 1213.5  | 358.6   | 772.5  | 0    |                 |
| SITYG_12170 | -           | 1215466 | 1216810 Mur ligase family protein                           | 447 | M     | 145.1   | 327.0   | 179.3  | 0    |                 |
| SITYG_12180 | -           | 1216809 | 1217595 putative glutamine amidotransferase                 | 261 | R     | 174.2   | 363.4   | 166.1  | 1    |                 |
| SITYG_12190 | -           | 1217625 | 1217625 hypothetical protein                                | 85  |       | 80.4    | 340.7   | 311.4  | 4.2  |                 |
| SITYG_12200 | -           | 1217695 | 1218882 ABC transporter, ATP-binding protein                | 631 | R     | 100.6   | 312.9   | 143.0  | 1    | alive in vivo   |
| SITYG_12210 | -           | 1219855 | 1220321 hypothetical protein                                | 121 |       | 79.3    | 300.2   | 54.9   | 2    | alive in vivo   |
| SITYG_12220 | -           | 1220522 | 1221024 Zn-dependent protease                               | 233 | O     | 797.7   | 438.2   | 600.8  | 0    |                 |
| SITYG_12230 | <i>estA</i> | 1221167 | 1221959 putative esterase                                   | 263 | R     | 471.4   | 638.2   | 646.6  | 2    | vivo-attenuated |
| SITYG_12240 | -           | 1222063 | 1223725 hypothetical protein                                | 553 | R     | 611.5   | 409.9   | 561.9  | 1    | alive in vivo   |
| SITYG_12250 | -           | 1224153 | 1224192 hypothetical protein                                | 12  |       | 0.0     | 563.5   | 0.0    | 0    |                 |
| SITYG_12260 | -           | 1224420 | 1225707 putative protease                                   | 428 | O     | 1005.6  | 358.6   | 795.9  | 0    |                 |
| SITYG_12270 | -           | 1225834 | 1226764 putative protease                                   | 309 | O     | 767.2   | 448.9   | 442.7  | 0    |                 |
| SITYG_12280 | -           | 1226902 | 1227196 hypothetical protein                                | 97  |       | 338.6   | 149.5   | 649.0  | 0    |                 |
| SITYG_12290 | -           | 1227282 | 1227750 hypothetical protein                                | 155 |       | 1081.4  | 563.5   | 965.6  | 0    |                 |
| SITYG_12300 | -           | 1227765 | 1228149 hypothetical protein                                | 127 | R     | 334.9   | 228.9   | 287.7  | 0    |                 |
| SITYG_12310 | <i>lgt</i>  | 1228166 | 1228940 prolipoprotein diacylglycerol transferase           | 257 | M     | 343.0   | 369.1   | 272.5  | 1    | alive in vivo   |
| SITYG_12320 | -           | 1228932 | 1229865 HPr kinase/phosphorylase                            | 310 | T     | 560.2   | 282.6   | 742.7  | 0    |                 |
| SITYG_12330 | -           | 1229975 | 1230518 NTP pyrophosphorylases                              | 180 | LR    | 603.5   | 202.3   | 536.3  | 0    |                 |
| SITYG_12340 | -           | 1230546 | 1230825 hypothetical protein                                | 92  | KT    | 3494.0  | 315.0   | 2591.5 | 0    |                 |
| SITYG_12350 | -           | 1230919 | 1231357 putative Zn-dependent metalloprotease               | 145 | S     | 303.1   | 451.5   | 435.6  | 0    |                 |
| SITYG_12360 | -           | 1231343 | 1233473 putative transcriptional accessory protein          | 709 | K     | 570.6   | 443.6   | 622.3  | 0    |                 |
| SITYG_12370 | -           | 1233592 | 1233733 hypothetical protein                                | 46  |       | 764.9   | 0.0     | 427.3  | 0    |                 |
| SITYG_12380 | -           | 1233729 | 1234636 putative permease                                   | 301 | R     | 448.7   | 921.7   | 742.6  | 0    |                 |
| SITYG_12390 | -           | 1234631 | 1235447 putative membrane protein                           | 271 | S     | 894.7   | 727.1   | 726.1  | 0    |                 |
| SITYG_12400 | -           | 1235561 | 1236926 putative transporter                                | 454 | QEPFR | 112.4   | 402.5   | 103.0  | 1    | alive in vivo   |
| SITYG_12410 | -           | 1236973 | 1238481 glucose-6-phosphate dehydrogenase                   | 495 | G     | 407.0   | 236.3   | 492.7  | 3    | vivo-attenuated |
| SITYG_12420 | -           | 1239035 | 1239728 hypothetical protein                                | 230 |       | 209.5   | 570.8   | 420.2  | 0    |                 |
| SITYG_12430 | -           | 1239975 | 1240608 hypothetical protein                                | 210 | R     | 340.8   | 694.3   | 507.7  | 1    | alive in vivo   |
| SITYG_12440 | -           | 1240591 | 1242286 putative ABC transporter, ATP-binding protein       | 564 | V     | 217.8   | 285.2   | 432.5  | 1    | alive in vivo   |
| SITYG_12450 | -           | 1242303 | 1243569 putative lantionine synthetase C-like protein       | 421 |       | 147.4   | 329.8   | 261.8  | 1    | alive in vivo   |
| SITYG_12460 | -           | 1243546 | 1244266 putative NADPH-dependent FMN reductase              | 239 | R     | 265.0   | 305.2   | 195.3  | 2    | alive in vivo   |
| SITYG_12470 | -           | 1244386 | 1244596 hypothetical protein                                | 69  |       | 434.6   | 11615.2 | 669.5  | 0    |                 |
| SITYG_12480 | -           | 1244652 | 1247652 putative lantibiotic dehydratase                    | 999 |       | 225.4   | 380.9   | 217.6  | 2    | alive in vivo   |
| SITYG_12490 | -           | 1249488 | 1249620 hypothetical protein                                | 43  |       | 0.0     | 166.5   | 76.1   | 1    | alive in vivo   |
| SITYG_12500 | -           | 1249793 | 1250738 putative permease                                   | 314 | R     | 188.8   | 348.8   | 159.4  | 0    |                 |
| SITYG_12510 | -           | 1250751 | 1252374 malate dehydrogenase                                | 540 | C     | 222.4   | 1015.5  | 253.7  | 0    |                 |
| SITYG_12520 | -           | 1252547 | 1252904 putative transcriptional regulator                  | 118 | K     | 127.8   | 369.3   | 188.8  | 0    |                 |
| SITYG_12530 | -           | 1253027 | 1253918 putative transcriptional regulator                  | 296 | K     | 46.6    | 197.3   | 157.8  | 3.7  |                 |
| SITYG_12540 | -           | 1254081 | 1254744 DNA alkylation repair enzyme                        | 220 | L     | 112.6   | 198.9   | 166.6  | 0    |                 |
| SITYG_12550 | -           | 1254745 | 1255288 acetyltransferase                                   | 180 | M     | 160.4   | 788.9   | 332.9  | 0    |                 |
| SITYG_12560 | <i>rhs</i>  | 1255391 | 1257062 formalin-tetrahydrofolate ligase                    | 556 | F     | 372.4   | 420.8   | 607.0  | 0    |                 |
| SITYG_12570 | -           | 1257213 | 1257790 hypothetical protein                                | 188 |       | 58.5    | 155.0   | 53.1   | 1    | alive in vivo   |
| SITYG_12580 | -           | 1257883 | 1258576 phosphopantothinate-cysteine ligase                 | 230 | H     | 287.3   | 380.5   | 246.3  | 0    |                 |
| SITYG_12590 | -           | 1258572 | 1259124 phosphopantothenzoylcysteine decarboxylase          | 183 | H     | 473.4   | 358.3   | 345.6  | 0    |                 |
| SITYG_12600 | -           | 1259107 | 1259671 putative membrane protein                           | 187 | S     | 58.8    | 272.7   | 997.1  | 16.5 | 3.0             |
| SITYG_12610 | <i>pgm</i>  | 1259849 | 1261568 phosphoglucosylase                                  | 572 | G     | 1805.0  | 779.8   | 1238.5 | 1    | alive in vivo   |
| SITYG_12620 | <i>bta</i>  | 1261891 | 1262230 bacteriocin transport accessory protein             | 115 | OC    | 1311.2  | 505.2   | 634.8  | 0    |                 |
| SITYG_12630 | <i>mutY</i> | 1262413 | 1263589 A/G-specific adenine glycosylase                    | 391 | L     | 356.3   | 373.7   | 452.6  | 3    | vivo-attenuated |
| SITYG_12640 | <i>pta</i>  | 1263654 | 1264632 phosphate acetyltransferase                         | 325 | C     | 415.7   | 404.4   | 297.8  | 0    |                 |
| SITYG_12650 | -           | 1264635 | 1265532 23S rRNA pseudouridine synthase                     | 298 | J     | 744.5   | 930.9   | 828.4  | 0    |                 |
| SITYG_12660 | <i>ppnK</i> | 1265528 | 1266347 inorganic polyphosphate/ATP-NAD kinase              | 272 | G     | 212.7   | 295.1   | 404.6  | 0    |                 |
| SITYG_12670 | -           | 1266330 | 1267002 GTP pyrophosphokinase                               | 223 | S     | 956.8   | 523.2   | 747.2  | 0    |                 |
| SITYG_12680 | -           | 1267097 | 1267658 hypothetical protein                                | 186 | S     | 199.6   | 548.4   | 179.0  | 1    | alive in vivo   |
| SITYG_12690 | -           | 1267729 | 1268701 ribose-phosphate pyrophosphokinase                  | 323 | FE    | 247.5   | 339.1   | 309.9  | 0    |                 |
| SITYG_12700 | -           | 1268710 | 1269826 putative aminotransferase                           |     |       |         |         |        |      |                 |

|             |              |         |         |                                                               |      |    |         |        |        |        |  |   |
|-------------|--------------|---------|---------|---------------------------------------------------------------|------|----|---------|--------|--------|--------|--|---|
| SITYG_12860 | <i>truB</i>  | 1281374 | 1282253 | rRNA pseudouridine synthase B                                 | 292  | J  | 325.6   | 450.0  | 365.6  |        |  | 0 |
| SITYG_12870 | -            | 1282256 | 1283063 | putative alpha/beta hydrolase family protein                  | 268  | R  | 154.2   | 245.1  | 435.5  | 3.1    |  | 0 |
| SITYG_12880 | -            | 1283214 | 1283801 | hypothetical protein                                          | 128  |    | 182.2   | 227.1  | 337.3  |        |  | 0 |
| SITYG_12890 | -            | 1283606 | 1284875 | hypothetical protein                                          | 422  | S  | 310.5   | 381.0  | 237.4  |        |  | 4 |
| SITYG_12900 | -            | 1285068 | 1286082 | putative alpha/beta hydrolase family protein                  | 337  | R  | 77.7    | 390.1  | 158.5  |        |  | 1 |
| SITYG_12910 | -            | 1286087 | 1286576 | hypothetical protein                                          | 162  |    | 93.3    | 763.9  | 595.5  |        |  | 0 |
| SITYG_12920 | -            | 1286685 | 1288431 | ABC transporter, ATP-binding protein                          | 581  | V  | 83.2    | 528.6  | 281.8  | 3.7    |  | 1 |
| SITYG_12930 | -            | 1288423 | 1290190 | putative ABC transporter, ATP-binding protein                 | 588  | V  | 96.3    | 323.3  | 505.8  | 5.7    |  | 2 |
| SITYG_12940 | -            | 1290208 | 1290520 | putative TetR/AcrR family transcriptional regulator           | 203  | K  | 54.2    | 359.1  | 131.3  |        |  | 0 |
| SITYG_12950 | -            | 1290592 | 1291029 | hypothetical protein                                          | 48   |    | 0.0     | 0.0    | 0.0    |        |  | 0 |
| SITYG_12960 | -            | 1291686 | 1292088 | putative NUDIX family hydrolase                               | 133  | LR | 650.1   | 874.6  | 849.3  |        |  | 0 |
| SITYG_12970 | <i>pcrA</i>  | 1292113 | 1294396 | ATP-dependent DNA helicase PcrA                               | 760  | L  | 388.8   | 385.0  | 457.5  |        |  | 4 |
| SITYG_12980 | -            | 1294545 | 1295745 | putative cation efflux family protein                         | 399  | P  | 197.0   | 457.8  | 259.4  |        |  | 0 |
| SITYG_12990 | -            | 1296037 | 1296169 | hypothetical protein                                          | 43   | E  | 0.0     | 166.5  | 76.1   |        |  | 0 |
| SITYG_13000 | -            | 1296409 | 1296967 | signal peptidase I                                            | 185  | U  | 4326.6  | 512.0  | 2843.4 |        |  | 0 |
| SITYG_13010 | -            | 1297129 | 1298632 | pyruvate kinase                                               | 500  | G  | 2831.7  | 321.7  | 1570.1 |        |  | 0 |
| SITYG_13020 | -            | 1298690 | 1299701 | 6-phosphofructokinase                                         | 336  | G  | 4394.4  | 586.9  | 3496.3 |        |  | 0 |
| SITYG_13030 | <i>dnaE</i>  | 1299783 | 1302885 | DNA-polymerase III subunit alpha                              | 1033 | L  | 204.6   | 389.6  | 339.9  |        |  | 0 |
| SITYG_13040 | -            | 1303016 | 1303211 | GntR family transcriptional regulator                         | 64   | K  | 63.8    | 225.4  | 0.0    |        |  | 0 |
| SITYG_13050 | -            | 1303231 | 1303426 | putative ABC transporter, ATP-binding protein                 | 64   | V  | 0.0     | 0.0    | 51.5   |        |  | 0 |
| SITYG_13060 | <i>recJ</i>  | 1303723 | 1305958 | single-stranded-DNA-specific exonuclease RecJ                 | 744  | L  | 293.2   | 491.6  | 278.6  |        |  | 0 |
| SITYG_13070 | -            | 1306056 | 1306464 | putative GNAT-family acetyltransferase                        | 135  | KR | 172.8   | 646.3  | 566.1  | 3.8    |  | 0 |
| SITYG_13080 | -            | 1306447 | 1307179 | methyltransferase                                             | 243  | QR | 345.7   | 510.3  | 260.7  |        |  | 1 |
| SITYG_13090 | -            | 1307188 | 1307944 | putative short chain dehydrogenase                            | 251  | R  | 351.2   | 377.9  | 385.2  |        |  | 0 |
| SITYG_13100 | -            | 1307953 | 1308565 | putative phosphoglycerate mutase                              | 203  | G  | 427.0   | 718.1  | 295.4  |        |  | 0 |
| SITYG_13110 | -            | 1308607 | 1309537 | ribonuclease Z                                                | 309  | R  | 615.5   | 661.6  | 647.9  |        |  | 0 |
| SITYG_13120 | -            | 1309547 | 1310177 | hypothetical protein                                          | 209  |    | 368.7   | 523.2  | 494.1  |        |  | 0 |
| SITYG_13130 | <i>hdx</i>   | 1310169 | 1311408 | GTP-binding protein Hdx                                       | 412  | R  | 328.1   | 532.1  | 397.1  |        |  | 0 |
| SITYG_13140 | <i>miaA</i>  | 1311400 | 1312286 | RNA delta(2)-isopentenylpyrophosphate transferase             | 294  | J  | 389.0   | 347.6  | 408.5  |        |  | 0 |
| SITYG_13150 | -            | 1312362 | 1312533 | hypothetical protein                                          | 56   |    | 1091.6  | 385.5  | 1409.4 |        |  | 0 |
| SITYG_13160 | -            | 1312673 | 1312811 | putative macrolide ABC transporter permease                   | 45   | V  | 0.0     | 0.0    | 0.0    |        |  | 0 |
| SITYG_13170 | -            | 1313120 | 1314470 | glutathione reductase                                         | 449  | C  | 500.9   | 358.1  | 386.8  |        |  | 0 |
| SITYG_13180 | -            | 1314909 | 1315446 | putative biotin synthase                                      | 178  | R  | 455.8   | 327.4  | 243.1  |        |  | 0 |
| SITYG_13190 | -            | 1315646 | 1316111 | hypothetical protein                                          | 154  | J  | 0.0     | 94.5   | 0.0    |        |  | 0 |
| SITYG_13200 | <i>pheT</i>  | 1315958 | 1318364 | phenylalanyl-tRNA synthetase subunit beta                     | 801  | J  | 317.2   | 337.9  | 409.0  |        |  | 0 |
| SITYG_13210 | -            | 1318500 | 1319028 | acetyltransferase                                             | 175  | KR | 298.5   | 332.9  | 551.5  |        |  | 0 |
| SITYG_13220 | <i>pheS</i>  | 1319032 | 1320145 | phenylalanyl-tRNA synthetase subunit alpha                    | 370  | J  | 402.5   | 414.6  | 550.4  |        |  | 0 |
| SITYG_13230 | -            | 1320384 | 1322250 | putative ABC transporter ATP-binding protein                  | 621  | R  | 351.2   | 423.9  | 382.1  |        |  | 1 |
| SITYG_13240 | <i>papS</i>  | 1322246 | 1323446 | RNA CCA-pyrophosphorylase                                     | 399  | J  | 252.3   | 183.1  | 217.6  |        |  | 0 |
| SITYG_13250 | <i>dapB</i>  | 1323442 | 1324210 | dihydrodipicolinate reductase                                 | 255  | E  | 399.7   | 228.9  | 287.7  |        |  | 0 |
| SITYG_13260 | -            | 1324220 | 1325069 | hypothetical protein                                          | 282  | S  | 395.8   | 336.5  | 343.0  |        |  | 0 |
| SITYG_13270 | -            | 1325072 | 1325447 | hypothetical protein                                          | 124  | S  | 3550.8  | 234.4  | 1928.1 |        |  | 0 |
| SITYG_13280 | <i>fruA</i>  | 1325607 | 1327557 | putative PTS system, fructose-specific enzyme IIABC component | 649  | G  | 338.2   | 405.7  | 448.0  |        |  | 0 |
| SITYG_13290 | <i>fruB</i>  | 1327553 | 1328485 | 1-phosphofructokinase                                         | 303  | G  | 463.9   | 378.8  | 528.5  |        |  | 0 |
| SITYG_13300 | <i>fruR</i>  | 1328481 | 1329124 | transcriptional regulators of sugar metabolism                | 220  | KG | 394.2   | 530.3  | 530.1  |        |  | 1 |
| SITYG_13310 | <i>pepIV</i> | 1329361 | 1331965 | aminopeptidase N                                              | 847  | E  | 432.1   | 311.0  | 280.3  |        |  | 1 |
| SITYG_13320 | -            | 1332068 | 1333006 | thioester reductase                                           | 322  | C  | 342.5   | 340.2  | 217.6  |        |  | 0 |
| SITYG_13330 | -            | 1333065 | 1334757 | putative phosphoglucomutase/phosphomannomutase protein        | 563  | G  | 1076.3  | 545.5  | 753.7  |        |  | 4 |
| SITYG_13340 | <i>dnaD</i>  | 1335262 | 1335937 | putative DNA replication protein                              | 224  | L  | 393.3   | 227.9  | 208.3  |        |  | 0 |
| SITYG_13350 | -            | 1335987 | 1336260 | homoserine O-succinyltransferase                              | 93   | E  | 117.7   | 233.8  | 249.3  |        |  | 0 |
| SITYG_13360 | -            | 1336522 | 1336630 | putative homoserine O-succinyltransferase                     | 38   | E  | 248.2   | 0.0    | 85.8   |        |  | 0 |
| SITYG_13370 | <i>apt</i>   | 1336940 | 1337453 | adenine phosphoribosyltransferase                             | 170  | F  | 1916.4  | 428.4  | 2075.0 |        |  | 0 |
| SITYG_13380 | -            | 1337576 | 1338272 | hypothetical protein                                          | 231  | M  | 160.9   | 378.9  | 245.3  |        |  | 0 |
| SITYG_13390 | -            | 1338264 | 1338645 | putative effector of murein hydrolase LrgA                    | 126  | R  | 130.7   | 288.4  | 105.4  |        |  | 0 |
| SITYG_13400 | -            | 1339117 | 1339243 | hypothetical protein                                          | 41   |    | 1514.4  | 3313.6 | 1195.5 |        |  | 0 |
| SITYG_13410 | -            | 1339372 | 1340374 | hypothetical protein                                          | 333  | S  | 53.8    | 372.8  | 120.3  |        |  | 0 |
| SITYG_13420 | -            | 1340746 | 1342516 | putative ABC transporter ATP-binding/permease protein         | 589  | V  | 138.3   | 173.8  | 164.5  |        |  | 2 |
| SITYG_13430 | -            | 1342525 | 1344262 | putative ABC transporter ATP-binding/permease protein         | 578  | V  | 382.1   | 506.0  | 560.8  |        |  | 1 |
| SITYG_13440 | <i>endA</i>  | 1344415 | 1345261 | putative DNA-entry endonuclease                               | 281  |    | 505.0   | 363.6  | 747.8  |        |  | 1 |
| SITYG_13450 | -            | 1345323 | 1345500 | DNA-directed RNA polymerase subunit beta                      | 58   |    | 281.2   | 124.2  | 113.5  |        |  | 0 |
| SITYG_13460 | -            | 1345492 | 1346773 | UDP-N-acetylglucosamine 1-carboxyvinyltransferase             | 426  | M  | 1169.0  | 617.6  | 956.4  |        |  | 1 |
| SITYG_13470 | -            | 1346810 | 1347041 | hypothetical protein                                          | 76   |    | 1436.6  | 285.4  | 1347.6 |        |  | 0 |
| SITYG_13480 | -            | 1347142 | 1347562 | ATP synthase subunit epsilon                                  | 139  | C  | 659.3   | 313.9  | 1338.9 |        |  | 0 |
| SITYG_13490 | -            | 1347572 | 1348970 | ATP synthase subunit beta                                     | 468  | C  | 690.4   | 374.8  | 606.7  |        |  | 0 |
| SITYG_13500 | -            | 1349013 | 1348992 | ATP synthase subunit gamma                                    | 292  | C  | 854.2   | 175.0  | 628.3  |        |  | 0 |
| SITYG_13510 | -            | 1349007 | 1351413 | ATP synthase subunit alpha                                    | 501  | C  | 818.1   | 277.2  | 573.4  |        |  | 0 |
| SITYG_13520 | -            | 1351428 | 1351965 | ATP synthase subunit delta                                    | 178  | C  | 115.9   | 81.8   | 74.8   |        |  | 0 |
| SITYG_13530 | -            | 1351964 | 1352459 | proton-translocating ATPase subunit b                         | 164  | C  | 1843.6  | 621.5  | 872.3  |        |  | 0 |
| SITYG_13540 | -            | 1352473 | 1353187 | ATP synthase subunit A                                        | 237  | C  | 1899.8  | 800.2  | 1153.3 |        |  | 0 |
| SITYG_13550 | -            | 1353226 | 1353427 | ATP synthase subunit C                                        | 66   | C  | 12258.8 | 546.6  | 6145.1 |        |  | 0 |
| SITYG_13560 | <i>glgP</i>  | 1353740 | 1356140 | glycogen phosphorylase                                        | 799  | G  | 155.6   | 631.8  | 292.9  |        |  | 1 |
| SITYG_13570 | <i>glgA</i>  | 1356161 | 1357595 | glycogen synthase                                             | 477  | G  | 112.8   | 536.3  | 364.1  | 3.5    |  | 2 |
| SITYG_13580 | <i>glgD</i>  | 1357591 | 1358731 | glucose-1-phosphate adenylyltransferase, GlgD subunit         | 379  | G  | 141.9   | 1811.9 | 308.3  |        |  | 0 |
| SITYG_13590 | <i>glgC</i>  | 1358720 | 1359863 | glucose-1-phosphate adenylyltransferase                       | 380  | G  | 105.2   | 1384.2 | 289.9  |        |  | 0 |
| SITYG_13600 | <i>glgB</i>  | 1359866 | 1361777 | 1,4-alpha-glucan branching enzyme                             | 636  | G  | 256.1   | 977.4  | 446.7  |        |  | 4 |
| SITYG_13610 | <i>rexA</i>  | 1362290 | 1365971 | ATP-dependent nuclease subunit A                              | 1226 | L  | 220.9   | 507.4  | 234.6  |        |  | 0 |
| SITYG_13620 | <i>rexB</i>  | 1365967 | 1369240 | ATP-dependent nuclease subunit B                              | 1090 | L  | 176.2   | 476.7  | 411.1  |        |  | 1 |
| SITYG_13630 | -            | 1369361 | 1370576 | putative ABC transporter, permease component                  | 404  | CP | 331.2   | 560.7  | 231.4  |        |  | 0 |
| SITYG_13640 | -            | 1370572 | 1371466 | putative ABC transporter ATP-binding protein                  | 297  | R  | 607.8   | 368.7  | 763.8  |        |  | 1 |
| SITYG_13650 | -            | 1371546 | 1371660 | hypothetical protein                                          | 37   |    | 0.0     | 192.8  | 0.0    |        |  | 0 |
| SITYG_13660 | -            | 1371670 | 1371964 | hypothetical protein                                          | 97   |    | 254.0   | 224.2  | 273.3  |        |  | 0 |
| SITYG_13670 | -            | 1371941 | 1372243 | hypothetical protein                                          | 133  |    | 690.3   | 963.9  | 1648.7 |        |  | 0 |
| SITYG_13680 | -            | 1372324 | 1373503 | hypothetical protein                                          | 422  |    | 326.9   | 588.8  | 292.8  |        |  | 0 |
| SITYG_13690 | -            | 1373594 | 1373990 | hypothetical protein                                          | 131  |    | 544.7   | 166.5  | 557.9  |        |  | 0 |
| SITYG_13700 | -            | 1374026 | 1374275 | hypothetical protein                                          | 82   |    | 183.3   | 0.0    | 40.3   | 4.2    |  | 0 |
| SITYG_13710 | -            | 1374276 | 1374597 | hypothetical protein                                          | 106  |    | 25.8    | 342.3  | 0.0    |        |  | 0 |
| SITYG_13720 | -            | 1374738 | 1374948 | hypothetical protein                                          | 69   |    | 118.5   | 0.0    | 0.0    | <105.3 |  | 0 |
| SITYG_13730 | -            | 1374947 | 1375340 | hypothetical protein                                          | 130  |    | 95.0    | 111.8  | 51.1   |        |  | 1 |
| SITYG_13740 | -            | 1375881 | 1376040 | hypothetical protein                                          | 52   |    | 78.3    | 414.6  | 189.5  |        |  | 0 |
| SITYG_13750 | -            | 1376290 | 1376710 | hypothetical protein                                          | 139  |    | 187.7   | 157.0  | 167.4  |        |  | 0 |
| SITYG_13760 | -            | 1376916 | 1377129 | hypothetical protein                                          | 70   | S  | 116.8   | 103.2  | 94.3   |        |  | 0 |
| SITYG_13770 | -            | 1377230 | 1377557 | hypothetical protein                                          | 108  |    | 1522.3  | 336.0  | 614.2  |        |  | 0 |
| SITYG_13780 | -            | 1377569 | 1378328 | ABC transporter, ATP-binding protein                          | 252  | R  | 49.2    | 202.7  | 172.0  | 3.8    |  | 1 |
| SITYG_13790 | -            | 1378324 | 1379191 | ABC transporter permease                                      | 288  | R  | 124.4   | 709.7  | 324.3  |        |  | 0 |
| SITYG_13800 | -            | 1379234 | 1380239 | peptide ABC transporter substrate-binding protein             | 334  | R  | 111.4   | 262.4  | 259.8  |        |  | 0 |
| SITYG_13810 | -            | 1380403 | 1380619 | hypothetical protein                                          | 71   |    | 288.1   | 0.0    | 325.4  |        |  | 0 |
| SITYG_13820 | -            | 1380724 | 1382374 | fibronectin-binding protein A                                 | 549  | K  | 211.2   | 532.7  | 225.2  |        |  | 1 |
| SITYG_13830 | <i>alcB</i>  | 1382689 | 1383409 | alpha-acetolactate decarboxylase                              | 239  | O  | 351.4   | 244.2  | 237.1  |        |  | 0 |
| SITYG_13840 | -            | 1383452 | 1385117 | acetolactate synthase                                         | 554  | EH | 535.6   | 580.7  | 591.1  |        |  | 0 |
| SITYG_13850 | -            | 1385199 | 1386447 | hypothetical protein                                          | 415  | R  | 275.9   | 523.2  | 579.3  |        |  | 1 |
| SITYG_13860 | -            | 1386415 | 1387594 | hypothetical protein                                          | 392  | R  | 348.3   | 652.3  | 662.1  |        |  | 2 |
| SITYG_13870 | -            | 1387857 | 1388243 | FeS assembly protein SufB                                     | 461  | O  | 1146.3  | 475.6  | 1007.1 |        |  | 0 |
| SITYG_13880 | -            | 1389375 | 1389819 | flavodoxin                                                    | 147  | C  | 9828.6  | 1187.8 | 8481.4 |        |  | 0 |
| SITYG_13890 | -            | 1389964 | 1390903 | hypothetical protein                                          | 312  | R  | 388.8   | 351.0  | 406.4  |        |  | 1 |
| SITYG_13900 | -            | 1390899 | 1391025 | hypothetical protein                                          | 41   |    | 131.7   | 174.4  | 159.4  |        |  | 0 |
| SITYG_13910 | <i>rpmE</i>  | 1       |         |                                                               |      |    |         |        |        |        |  |   |

|             |              |         |                                                                                                |      |        |        |        |        |        |   |                 |
|-------------|--------------|---------|------------------------------------------------------------------------------------------------|------|--------|--------|--------|--------|--------|---|-----------------|
| SITYG_14150 | -            | 1417827 | 1418025 hypothetical protein                                                                   | 65   | 188.6  | 222.0  | 0.0    | -188.6 | -322.0 | 1 | vivo-attenuated |
| SITYG_14160 | -            | 1418017 | 1418443 hypothetical protein                                                                   | 141  | 136.3  | 103.2  | 94.3   |        |        | 2 | vivo-attenuated |
| SITYG_14170 | -            | 1418435 | 1418852 hypothetical protein                                                                   | 138  | 218.8  | 263.5  | 289.0  |        |        | 1 | alive in vivo   |
| SITYG_14180 | -            | 1418848 | 1419439 hypothetical protein                                                                   | 196  | 252.7  | 223.1  | 203.9  |        |        | 0 |                 |
| SITYG_14190 | -            | 1419484 | 1419835 hypothetical protein                                                                   | 116  | 59.1   | 313.0  | 28.6   |        |        | 0 |                 |
| SITYG_14200 | -            | 1419821 | 1420013 hypothetical protein                                                                   | 63   | 172.8  | 457.8  | 889.1  | 5.0    |        | 0 |                 |
| SITYG_14210 | -            | 1420249 | 1420600 hypothetical protein                                                                   | 116  | 23.6   | 250.4  | 200.3  | 9.2    |        | 1 | alive in vivo   |
| SITYG_14220 | -            | 1420619 | 1420970 hypothetical protein                                                                   | 116  | 47.3   | 313.0  | 28.6   |        |        | 0 |                 |
| SITYG_14230 | -            | 1420956 | 1421187 hypothetical protein                                                                   | 76   | 53.9   | 380.5  | 217.4  |        | 4.4    | 1 | alive in vivo   |
| SITYG_14240 | -            | 1421384 | 1421735 hypothetical protein                                                                   | 116  | 1997.3 | 375.6  | 935.5  |        |        | 0 |                 |
| SITYG_14250 | -            | 1421755 | 1422106 hypothetical protein                                                                   | 116  | 708.1  | 313.0  | 1487.7 |        |        | 0 |                 |
| SITYG_14260 | -            | 1422092 | 1424141 hypothetical protein                                                                   | 682  | 510.2  | 343.2  | 377.4  |        |        | 3 | alive in vivo   |
| SITYG_14270 | -            | 1424388 | 1425066 putative membrane protein                                                              | 225  | 379.3  | 388.9  | 325.8  |        |        | 2 | vivo-attenuated |
| SITYG_14280 | -            | 1425069 | 1425774 putative membrane protein                                                              | 234  | 276.5  | 592.2  | 213.7  |        |        | 0 |                 |
| SITYG_14290 | -            | 1425780 | 1426329 hypothetical protein                                                                   | 182  | 309.8  | 280.2  | 493.9  |        |        | 0 |                 |
| SITYG_14300 | <i>murF</i>  | 1426318 | 1427688 UDP-N-acetylmuramoylalanine-D-glutaryl-2,6-diaminopimelate-D-alanyl-D-alanine ligase   | 456  | 1391.8 | 609.1  | 1084.0 |        |        | 0 |                 |
| SITYG_14310 | -            | 1427942 | 1428995 D-alanyl-alanine synthetase A                                                          | 350  | 1024.2 | 542.6  | 839.2  |        |        | 0 |                 |
| SITYG_14320 | <i>recR</i>  | 1428119 | 1429716 recombination protein RecR                                                             | 198  | 479.4  | 625.7  | 740.1  |        |        | 0 |                 |
| SITYG_14330 | <i>pbp2b</i> | 1429726 | 1431787 putative penicillin-binding protein 2B                                                 | 686  | 408.6  | 469.1  | 550.6  |        |        | 1 | alive in vivo   |
| SITYG_14340 | <i>gpmA</i>  | 1431943 | 1432636 phosphoglycerate mutase                                                                | 230  | 2322.5 | 475.6  | 2057.7 |        |        | 0 |                 |
| SITYG_14350 | -            | 1432773 | 1433235 putative Fe/Zn uptake regulation protein                                               | 153  | 826.0  | 998.8  | 1021.6 |        |        | 1 | alive in vivo   |
| SITYG_14360 | -            | 1433403 | 1433679 transcriptional regulator HU subunit beta                                              | 91   | 7033.9 | 477.7  | 4256.9 |        |        | 0 |                 |
| SITYG_14370 | -            | 1433807 | 1434641 hypothetical protein                                                                   | 277  | 1009.7 | 395.2  | 445.5  |        |        | 1 | alive in vivo   |
| SITYG_14380 | -            | 1434876 | 1435830 putative iron compound ABC transporter permease protein                                | 317  | 126.1  | 391.6  | 189.5  |        |        | 2 | vivo-attenuated |
| SITYG_14390 | -            | 1435961 | 1436785 putative ABC transporter permease                                                      | 307  | 139.2  | 665.9  | 619.5  | 4.8    |        | 2 | alive in vivo   |
| SITYG_14400 | -            | 1436785 | 1437538 iron complex transporter system ATP-binding protein                                    | 250  | 275.4  | 992.2  | 466.8  |        |        | 0 |                 |
| SITYG_14410 | -            | 1437559 | 1438531 putative ABC transporter, periplasmic component                                        | 323  | 102.4  | 429.5  | 423.6  | 4.5    |        | 0 |                 |
| SITYG_14420 | <i>pphA</i>  | 1438593 | 1439325 serine/threonine protein phosphatase 1                                                 | 243  | 549.7  | 420.3  | 685.9  |        |        | 0 |                 |
| SITYG_14430 | <i>recV</i>  | 1439636 | 1441295 putative DNA repair protein RecV                                                       | 552  | 417.6  | 410.6  | 650.8  |        |        | 0 |                 |
| SITYG_14440 | -            | 1441302 | 1441734 transcriptional regulator                                                              | 143  | 585.7  | 254.3  | 278.9  |        |        | 0 |                 |
| SITYG_14450 | -            | 1441726 | 1442542 putative rRNA methylase                                                                | 271  | 254.2  | 350.1  | 196.9  |        |        | 1 | alive in vivo   |
| SITYG_14460 | -            | 1442507 | 1443410 putative geranyl/geranyl pyrophosphate synthase                                        | 300  | 803.9  | 608.4  | 656.1  |        |        | 0 |                 |
| SITYG_14470 | -            | 1443406 | 1443619 exodeoxyribonuclease VII small subunit                                                 | 70   | 331.1  | 722.2  | 235.7  |        |        | 0 |                 |
| SITYG_14480 | <i>xseA</i>  | 1443596 | 1444937 exodeoxyribonuclease VII large subunit                                                 | 446  | 665.1  | 491.6  | 426.8  |        |        | 0 |                 |
| SITYG_14490 | -            | 1445218 | 1445680 putative transcriptional regulator                                                     | 153  | 134.7  | 142.7  | 65.2   |        |        | 2 | vivo-attenuated |
| SITYG_14500 | -            | 1445726 | 1446956 hypothetical protein                                                                   | 409  | 114.7  | 178.7  | 236.8  |        |        | 1 | alive in vivo   |
| SITYG_14510 | -            | 1447064 | 1448528 putative beta-fructosidase                                                             | 487  | 31.2   | 315.2  | 109.7  | 3.8    | -3.4   | 1 | alive in vivo   |
| SITYG_14520 | -            | 1448535 | 1449387 sugar ABC transporter permease                                                         | 283  | 63.3   | 464.3  | 212.2  | 3.7    |        | 0 |                 |
| SITYG_14530 | -            | 1449388 | 1450273 ABC transporter permease                                                               | 294  | 75.0   | 546.3  | 295.0  | 4.3    |        | 0 |                 |
| SITYG_14540 | -            | 1450361 | 1451675 sugar ABC transporter substrate-binding protein                                        | 437  | 31.6   | 234.1  | 22.9   |        |        | 2 | vivo-attenuated |
| SITYG_14550 | -            | 1451806 | 1452802 putative transcriptional regulator                                                     | 331  | 437.3  | 286.8  | 453.7  |        |        | 1 | alive in vivo   |
| SITYG_14560 | -            | 1452885 | 1453719 putative carbohydrate kinase                                                           | 277  | 388.0  | 658.7  | 301.0  |        |        | 1 | alive in vivo   |
| SITYG_14570 | <i>foD</i>   | 1453824 | 1454679 5,10-methylene-tetrahydrofolate dehydrogenase/Methenyl tetrahydrofolate cyclohydrolase | 284  | 242.6  | 334.1  | 232.2  |        |        | 0 |                 |
| SITYG_14580 | -            | 1454948 | 1456241 hypothetical protein                                                                   | 430  | 166.8  | 254.9  | 101.0  |        |        | 1 | alive in vivo   |
| SITYG_14590 | -            | 1455252 | 1456900 putative ABC transporter, ATP binding protein                                          | 215  | 204.8  | 610.4  | 248.0  |        |        | 1 | vivo-attenuated |
| SITYG_14600 | -            | 1456923 | 1458312 putative ABC transporter permease                                                      | 462  | 149.3  | 221.5  | 195.2  |        |        | 2 | alive in vivo   |
| SITYG_14610 | -            | 1458367 | 1458517 hypothetical protein                                                                   | 49   | 0.0    | 293.0  | 0.0    |        |        | 0 |                 |
| SITYG_14620 | -            | 1458755 | 1459298 hypothetical protein                                                                   | 180  | 152.8  | 283.3  | 74.0   |        |        | 0 |                 |
| SITYG_14630 | -            | 1459420 | 1459564 hypothetical protein                                                                   | 44   | 153.6  | 0.0    | 232.2  |        |        | 0 |                 |
| SITYG_14640 | -            | 1459572 | 1461717 ferrous iron transport protein B                                                       | 714  | 201.1  | 491.7  | 365.2  |        |        | 3 | alive in vivo   |
| SITYG_14650 | -            | 1461713 | 1462190 ferrous iron transport protein A                                                       | 158  | 121.7  | 414.6  | 526.3  | 4.7    |        | 0 |                 |
| SITYG_14660 | -            | 1462358 | 1462580 hypothetical protein                                                                   | 76   | 915.8  | 0.0    | 1521.5 |        |        | 0 |                 |
| SITYG_14670 | <i>clpE</i>  | 1462828 | 1465096 putative ATP-dependent Clp protease subunit                                            | 755  | 0      | 1308.0 | 314.4  |        |        | 1 | vivo-attenuated |
| SITYG_14680 | -            | 1465142 | 1465748 hypothetical protein                                                                   | 201  | 75.3   | 471.4  | 16.6   | 4.2    | -36.1  | 1 | alive in vivo   |
| SITYG_14690 | -            | 1465807 | 1466701 putative transcriptional regulator                                                     | 297  | 157.8  | 467.0  | 280.8  |        |        | 2 | vivo-attenuated |
| SITYG_14700 | -            | 1466887 | 1467307 hypothetical protein                                                                   | 149  | 525.4  | 439.5  | 602.5  |        |        | 0 |                 |
| SITYG_14710 | -            | 1467370 | 1467670 hypothetical protein                                                                   | 99   | 470.1  | 0.0    | 234.3  |        |        | 0 |                 |
| SITYG_14720 | -            | 1467743 | 1469798 putative transport protein                                                             | 684  | 181.7  | 524.0  | 322.5  |        |        | 5 | vivo-attenuated |
| SITYG_14730 | -            | 1469809 | 1470064 hypothetical protein                                                                   | 84   | 146.4  | 172.4  | 78.8   |        |        | 0 |                 |
| SITYG_14740 | -            | 1470076 | 1470625 methyltransferase                                                                      | 182  | 302.2  | 440.3  | 439.0  |        |        | 0 |                 |
| SITYG_14750 | -            | 1470618 | 1471554 Fe-S oxidoreductase                                                                    | 311  | 217.2  | 258.2  | 118.0  |        |        | 0 |                 |
| SITYG_14760 | -            | 1471603 | 1471927 methylated DNA-protein-cysteine methyltransferase                                      | 107  | 76.8   | 610.4  | 650.9  | 9.2    |        | 0 |                 |
| SITYG_14770 | -            | 1471948 | 1472599 membrane-associated phospholipid phosphatase                                           | 216  | 1      | 102.0  | 303.8  | 339.4  | 3.6    | 1 | alive in vivo   |
| SITYG_14780 | -            | 1472599 | 1473152 putative membrane protein                                                              | 187  | 514.8  | 389.6  | 373.9  |        |        | 4 | vivo-attenuated |
| SITYG_14790 | -            | 1473296 | 1473446 hypothetical protein                                                                   | 50   | 406.7  | 0.0    | 131.3  |        |        | 0 |                 |
| SITYG_14800 | -            | 1473584 | 1474097 putative RNA methyltransferase                                                         | 170  | 549.9  | 171.3  | 704.7  |        |        | 0 |                 |
| SITYG_14810 | <i>trkA</i>  | 1474420 | 1475770 potassium transporter peripheral membrane component                                    | 449  | 1010.9 | 586.0  | 565.3  |        |        | 2 | vivo-attenuated |
| SITYG_14820 | -            | 1475773 | 1477213 potassium transporter                                                                  | 479  | 279.4  | 579.9  | 418.4  |        |        | 2 | vivo-attenuated |
| SITYG_14830 | -            | 1477245 | 1477500 putative membrane protein insertion efficiency factor                                  | 84   | 113.9  | 258.5  | 196.9  |        |        | 0 |                 |
| SITYG_14840 | -            | 1477499 | 1478225 ribosomal large subunit pseudouridine synthase B                                       | 241  | 394.2  | 575.1  | 345.8  |        |        | 0 |                 |
| SITYG_14850 | -            | 1478211 | 1478778 segregation and condensation protein B                                                 | 188  | 709.7  | 542.6  | 921.0  |        |        | 0 |                 |
| SITYG_14860 | -            | 1478770 | 1479481 segregation and condensation protein A                                                 | 236  | 455.1  | 710.9  | 974.5  |        |        | 1 | alive in vivo   |
| SITYG_14870 | -            | 1479480 | 1480212 tyrosine recombinase XerD                                                              | 243  | 294.7  | 270.2  | 178.3  |        |        | 0 |                 |
| SITYG_14880 | -            | 1480208 | 1480670 hypothetical protein                                                                   | 153  | 502.8  | 332.9  | 499.9  |        |        | 0 |                 |
| SITYG_14890 | -            | 1480666 | 1481188 phosphoesterase                                                                        | 173  | 1033.1 | 1010.3 | 1308.2 |        |        | 2 | vivo-attenuated |
| SITYG_14900 | -            | 1481163 | 1482189 hypothetical protein                                                                   | 341  | 731.8  | 471.2  | 714.5  |        |        | 0 |                 |
| SITYG_14910 | <i>murI</i>  | 1482146 | 1482941 glutamate racemase                                                                     | 264  | 365.2  | 414.6  | 265.3  |        |        | 0 |                 |
| SITYG_14920 | -            | 1483033 | 1483282 hypothetical protein                                                                   | 82   | 249.9  | 176.5  | 201.6  |        |        | 0 |                 |
| SITYG_14930 | <i>lysA</i>  | 1483336 | 1484587 diaminopimelate decarboxylase                                                          | 416  | 215.5  | 421.6  | 305.0  |        |        | 2 | vivo-attenuated |
| SITYG_14940 | -            | 1484695 | 1485379 putative membrane protein                                                              | 227  | 2498.6 | 1188.7 | 1982.0 |        |        | 0 |                 |
| SITYG_14950 | -            | 1485404 | 1485956 predicted HD superfamily hydrolase                                                     | 163  | 1618.8 | 670.0  | 1306.3 |        |        | 0 |                 |
| SITYG_14960 | -            | 1485941 | 1486502 putative rRNA methylase                                                                | 246  | 436.6  | 286.2  | 474.3  |        |        | 0 |                 |
| SITYG_14970 | -            | 1486712 | 1486901 acylphosphatase                                                                        | 92   | 133.8  | 315.0  | 467.0  | 3.8    |        | 1 | alive in vivo   |
| SITYG_14980 | <i>jisC</i>  | 1487070 | 1487988 60kD inner membrane protein                                                            | 305  | 605.5  | 885.7  | 470.4  |        |        | 0 |                 |
| SITYG_14990 | -            | 1488119 | 1488594 putative muT like protein                                                              | 154  | 1302.4 | 850.6  | 734.3  |        |        | 0 |                 |
| SITYG_15000 | <i>greA</i>  | 1488660 | 1489143 transcription elongation factor GreA                                                   | 160  | 876.0  | 409.5  | 623.7  |        |        | 1 | vivo-attenuated |
| SITYG_15010 | -            | 1489346 | 1490951 hypothetical protein                                                                   | 534  | 2592.3 | 698.3  | 1564.2 |        |        | 0 |                 |
| SITYG_15020 | -            | 1490943 | 1491063 hypothetical protein                                                                   | 39   | 69.1   | 366.2  | 167.4  |        |        | 0 |                 |
| SITYG_15030 | -            | 1491059 | 1491557 NAT family acetyltransferase                                                           | 165  | 141.6  | 132.4  | 665.4  | 5.1    | 4.2    | 0 |                 |
| SITYG_15040 | -            | 1491553 | 1491928 putative acetyltransferase                                                             | 124  | 243.4  | 293.0  | 1044.4 | 4.7    |        | 0 |                 |
| SITYG_15050 | -            | 1491909 | 1492077 putative acetyltransferase                                                             | 55   | 172.8  | 130.8  | 119.5  |        |        | 0 |                 |
| SITYG_15060 | <i>murC</i>  | 1492066 | 1493398 UDP-N-acetylmuramate-L-alanine ligase                                                  | 443  | 685.1  | 478.4  | 278.9  |        |        | 0 |                 |
| SITYG_15070 | -            | 1493480 | 1494113 hypothetical protein                                                                   | 210  | 360.4  | 381.9  | 428.3  |        |        | 0 |                 |
| SITYG_15080 | -            | 1494154 | 1497265 putative DNA/RNA helicase                                                              | 1036 | 390.7  | 522.7  | 619.8  |        |        | 3 | vivo-attenuated |
| SITYG_15090 | <i>engA</i>  | 1497477 | 1498788 GTP-binding protein engA                                                               | 436  | 477.8  | 385.5  | 758.3  |        |        | 0 |                 |
| SITYG_15100 | -            | 1498915 | 1499362 hypothetical protein                                                                   | 148  | 556.8  | 393.3  | 921.1  |        |        | 0 |                 |
| SITYG_15110 | -            | 1499363 | 1499795 hypothetical protein                                                                   | 143  | 835.4  | 1169.9 | 906.6  |        |        | 0 |                 |
| SITYG_15120 | -            | 1499823 | 1500546 putative membrane protein                                                              | 240  | 321.3  | 364.7  | 388.9  |        |        | 0 |                 |
| SITYG_15130 | -            | 1500560 | 1501271 putative membrane protein                                                              | 236  | 198.4  | 618.1  | 211.9  |        |        | 0 |                 |
| SITYG_15140 | -            | 1501270 | 1502878 hypothetical protein                                                                   | 535  | 647.5  | 792.6  | 643.2  |        |        | 3 | alive in vivo   |
| SITYG_15150 | <i>dnaI</i>  | 1502909 | 1503800 primosomal protein DnaI                                                                | 299  | 373.3  | 415.1  | 323.6  |        |        | 0 |                 |
| SITYG_15160 | -            | 1503809 | 1504961 putative replication initiation and membrane attachment protein                        | 383  | 514.9  | 286.1  | 592.8  |        |        | 0 |                 |
| SITYG_15170 | <i>nrdR</i>  | 1504961 | 1505435 transcriptional repressor NrdR                                                         | 157  | 743.9  | 649.0  | 1186.4 |        |        | 0 |                 |
| SITYG_15180 | -            | 1505633 | 1506116 hypothetical protein                                                                   | 160  | 42.9   | 546.0  | 249.5  | 6.3    |        | 0 |                 |
| SITYG_15190 | -            | 1506166 | 1506982 hypothetical protein                                                                   | 271  | 71.2   | 565.5  | 443.0  | 6.8    |        | 0 |                 |
| SITYG_15200 | -            | 1506999 | 1509189 PTS system glucose-specific transporter subunit IIABC                                  | 729  | 314.4  | 923.1  | 559.4  |        |        | 1 | alive in vivo   |
| SITYG_15210 | -            | 1509400 | 1509964 PTS system glucose-specific transporter subunit IIABC                                  | 187  | 242.7  | 467.5  | 178.0  |        |        | 1 | alive in vivo   |
| SITYG_15220 | -            | 1510150 | 1510840 DNA-binding response regulator                                                         | 229  | 1857.7 | 923.6  | 1731.9 |        |        | 1 | vivo-attenuated |
| SITYG_15230 | <i>gnd</i>   | 1510848 | 1512273 6-phosphogluconate dehydrogenase                                                       | 474  | 2628.6 | 1079.5 | 1754.7 |        |        | 0 |                 |
| SITYG_15240 | -            | 1512364 | 1512901 hypothetical protein                                                                   | 178  | 610.3  | 736.6  | 280.5  |        |        | 0 |                 |
|             |              |         |                                                                                                |      |        |        |        |        |        |   |                 |

|             |      |         |                                                                     |      |     |         |        |         |         |                 |
|-------------|------|---------|---------------------------------------------------------------------|------|-----|---------|--------|---------|---------|-----------------|
| SITYG_15440 | -    | 1533056 | 1533749 methionine ABC transporter permease protein                 | 230  | P   | 131.7   | 253.7  | 231.8   | 2       | vivo-attenuated |
| SITYG_15450 | -    | 1533749 | 1534811 methionine ABC transporter ATP-binding protein              | 353  | P   | 164.1   | 538.0  | 661.9   | 4.4     | 0               |
| SITYG_15460 | -    | 1534803 | 1536177 putative succinyl-diaminopimelate desuccinylase             | 457  | E   | 114.7   | 335.9  | 307.0   | 0       | 0               |
| SITYG_15470 | -    | 1536266 | 1537118 putative lipoprotein                                        | 283  | P   | 277.5   | 696.4  | 660.0   | 0       | 0               |
| SITYG_15480 | -    | 1537272 | 1538097 ABC transporter, substrate-binding protein                  | 274  | ET  | 1282.2  | 772.4  | 1278.1  | 0       | 1               |
| SITYG_15490 | -    | 1538279 | 1539416 hypothetical protein                                        | 378  |     | 62.0    | 231.9  | 194.3   | 3.4     | 0               |
| SITYG_15500 | -    | 1539566 | 1540283 hypothetical protein                                        | 238  | S   | 2615.0  | 704.9  | 2198.9  | 0       | 0               |
| SITYG_15510 | -    | 1540397 | 1541489 hypothetical protein                                        | 363  | R   | 281.1   | 281.7  | 606.9   | 2       | vivo-attenuated |
| SITYG_15520 | -    | 1541490 | 1542228 S-adenosylmethionine-dependent methyltransferase            | 245  | QR  | 354.1   | 595.5  | 408.2   | 0       | 0               |
| SITYG_15530 | -    | 1542439 | 1542793 hypothetical protein                                        | 117  | S   | 1031.2  | 486.6  | 551.0   | 0       | 0               |
| SITYG_15540 | -    | 1542793 | 1543306 isochorismatase family protein                              | 170  | H   | 929.9   | 856.7  | 665.9   | 0       | 0               |
| SITYG_15550 | -    | 1543302 | 1543899 predicted HD superfamily hydrolase                          | 198  | H   | 715.7   | 441.7  | 773.8   | 0       | 0               |
| SITYG_15560 | nadD | 1543898 | 1544527 nicotinate-nucleotide adenyltransferase                     | 212  | H   | 207.7   | 343.9  | 141.4   | 0       | 0               |
| SITYG_15570 | -    | 1544539 | 1544851 RNA-binding protein                                         | 103  | J   | 372.3   | 493.0  | 257.5   | 0       | 0               |
| SITYG_15580 | -    | 1544914 | 1546021 GTP-binding protein YqgH                                    | 368  | R   | 590.8   | 377.2  | 644.1   | 0       | 0               |
| SITYG_15590 | -    | 1546023 | 1546551 HAD superfamily phosphatase                                 | 175  | R   | 942.8   | 582.7  | 779.8   | 0       | 0               |
| SITYG_15600 | -    | 1546700 | 1547327 hypothetical protein                                        | 208  | S   | 383.7   | 280.4  | 496.5   | 0       | 0               |
| SITYG_15610 | -    | 1547357 | 1548269 putative membrane protein                                   | 303  | GER | 377.5   | 313.2  | 671.7   | 0       | 0               |
| SITYG_15620 | -    | 1548363 | 1549410 putative bulanediol dehydrogenase                           | 348  | ER  | 344.7   | 902.5  | 259.0   | 2       | vivo-attenuated |
| SITYG_15630 | gatB | 1549538 | 1550972 aspartylglutamyl-RNA amidotransferase subunit B             | 477  | J   | 422.3   | 459.7  | 483.2   | 0       | 0               |
| SITYG_15640 | gatA | 1550971 | 1552438 aspartylglutamyl-RNA amidotransferase subunit A             | 488  | J   | 254.5   | 419.4  | 410.7   | 0       | 0               |
| SITYG_15650 | gatC | 1552437 | 1552740 aspartylglutamyl-RNA amidotransferase subunit C             | 100  | J   | 657.1   | 362.6  | 331.4   | 0       | 0               |
| SITYG_15660 | -    | 1552804 | 1554553 aspartyl-RNA synthetase                                     | 582  | J   | 71.2    | 314.1  | 172.2   | 0       | 0               |
| SITYG_15670 | -    | 1554932 | 1555508 isochorismatase family protein                              | 191  | Q   | 439.3   | 343.4  | 383.5   | 0       | 0               |
| SITYG_15680 | -    | 1555507 | 1556296 GTP-sensing transcriptional pleiotropic repressor           | 262  | K   | 1146.1  | 306.4  | 750.9   | 0       | 0               |
| SITYG_15690 | -    | 1556457 | 1557672 putative aminotransferase AlaT                              | 404  | E   | 399.5   | 524.5  | 586.8   | 0       | 0               |
| SITYG_15700 | -    | 1557624 | 1558271 universal stress protein UspA                               | 150  | T   | 1309.5  | 702.3  | 1307.9  | 0       | 0               |
| SITYG_15710 | -    | 1558322 | 1559171 predicted hydrolases of the HAD superfamily                 | 462  | R   | 421.1   | 379.7  | 412.1   | 3       | vivo-attenuated |
| SITYG_15720 | ansB | 1559775 | 1560738 asparaginase                                                | 320  | EJ  | 409.2   | 502.0  | 406.7   | 1       | alive in vivo   |
| SITYG_15730 | recG | 1561228 | 1563244 ATP-dependent DNA helicase RecG                             | 671  | LK  | 444.4   | 654.0  | 642.6   | 0       | 0               |
| SITYG_15740 | alr  | 1563347 | 1564454 alanine racemase                                            | 368  | M   | 419.7   | 615.4  | 353.8   | 0       | 0               |
| SITYG_15750 | -    | 1564440 | 1564842 Holo-[acyl-carrier-protein] synthase                        | 133  | I   | 175.4   | 273.3  | 174.9   | 0       | 0               |
| SITYG_15760 | -    | 1564847 | 1565888 putative phospho-2-dehydro-3-deoxyheptone aldolase          | 346  | E   | 1773.2  | 464.4  | 1321.6  | 0       | 0               |
| SITYG_15770 | secA | 1565908 | 1568428 prepeptidyl transferase subunit SecA                        | 839  | U   | 1822.2  | 575.5  | 1542.2  | 0       | 0               |
| SITYG_15780 | -    | 1568554 | 1570402 amino acid permease                                         | 615  | E   | 473.6   | 570.8  | 336.9   | 1       | alive in vivo   |
| SITYG_15790 | -    | 1570658 | 1571603 mannose-6-phosphate isomerase, class I                      | 314  | G   | 588.2   | 1139.4 | 786.4   | 0       | 0               |
| SITYG_15800 | -    | 1571630 | 1572356 GenR family transcriptional regulator                       | 241  | K   | 771.4   | 454.0  | 622.4   | 0       | 0               |
| SITYG_15810 | -    | 1572389 | 1573658 phosphotransferase system cellobiose-specific component IIC | 422  | G   | 163.4   | 346.3  | 166.2   | 0       | 0               |
| SITYG_15820 | -    | 1573800 | 1575198 beta-galactosidase                                          | 465  | G   | 32.6    | 314.4  | 143.7   | 4.8     | 0               |
| SITYG_15830 | -    | 1575231 | 1575369 hypothetical protein                                        | 45   |     | 0.0     | 0.0    | 0.0     | 2       | vivo-attenuated |
| SITYG_15840 | -    | 1575346 | 1575760 hypothetical protein                                        | 137  |     | 110.2   | 318.5  | 121.3   | 0       | 0               |
| SITYG_15850 | -    | 1575844 | 1577605 putative ABC transporter                                    | 586  | V   | 497.0   | 524.1  | 444.8   | 1       | alive in vivo   |
| SITYG_15860 | -    | 1577594 | 1579361 ABC multidrug transporter                                   | 588  | V   | 605.7   | 559.6  | 676.3   | 3       | alive in vivo   |
| SITYG_15870 | -    | 1579363 | 1579812 MarR family transcriptional regulator                       | 152  | K   | 1934.0  | 191.5  | 1531.5  | 0       | 0               |
| SITYG_15880 | -    | 1579583 | 1581171 putative NADH-dependent oxidoreductase                      | 395  | C   | 380.6   | 628.9  | 583.2   | 2       | alive in vivo   |
| SITYG_15890 | -    | 1581437 | 1581948 peptide deformylase                                         | 136  | J   | 181.7   | 427.7  | 390.9   | 0       | 0               |
| SITYG_15900 | scrK | 1581915 | 1582815 putative fructokinase                                       | 299  | KG  | 124.4   | 244.2  | 156.2   | 0       | 0               |
| SITYG_15910 | scrA | 1582952 | 1584851 PTS system, sucrose-specific IABC component                 | 632  | G   | 72.1    | 509.2  | 312.0   | 4.7     | 0               |
| SITYG_15920 | scrB | 1585042 | 1586497 sucrose-6-phosphate hydrolase                               | 484  | G   | 65.6    | 287.0  | 214.0   | 3.8     | 0               |
| SITYG_15930 | scrR | 1586477 | 1587443 transcriptional regulator                                   | 321  | K   | 77.3    | 384.0  | 197.5   | 0       | 0               |
| SITYG_15940 | -    | 1587528 | 1588347 hypothetical protein                                        | 272  | R   | 455.8   | 590.3  | 429.1   | 1       | alive in vivo   |
| SITYG_15950 | -    | 1588473 | 1589397 oligopeptide ABC transporter ATP-binding protein            | 307  | E   | 888.9   | 380.5  | 608.6   | 1       | vivo-attenuated |
| SITYG_15960 | -    | 1589407 | 1590475 oligopeptide ABC transporter ATP-binding protein AmiE       | 355  | EP  | 761.3   | 535.0  | 959.1   | 0       | 0               |
| SITYG_15970 | -    | 1590483 | 1591410 oligopeptide transport system permease protein AmiD         | 308  | EP  | 711.5   | 450.4  | 790.8   | 1       | vivo-attenuated |
| SITYG_15980 | -    | 1591409 | 1592906 oligopeptide transport system permease                      | 498  | EP  | 817.4   | 484.4  | 851.9   | 2       | vivo-attenuated |
| SITYG_15990 | aiiA | 1593279 | 1595259 oligopeptide-binding protein AiiA                           | 659  | E   | 142.5   | 643.7  | 481.8   | 3.7     | 0               |
| SITYG_16000 | -    | 1595455 | 1597432 oligopeptide-binding protein AiiA                           | 658  | E   | 1200.2  | 555.8  | 1112.4  | 0       | 0               |
| SITYG_16010 | -    | 1597590 | 1598277 hypothetical protein                                        | 228  | S   | 259.6   | 447.8  | 175.4   | 0       | 0               |
| SITYG_16020 | -    | 1598501 | 1600115 CTP synthetase                                              | 537  | F   | 1053.7  | 612.7  | 1007.9  | 0       | 0               |
| SITYG_16030 | rhoE | 1600357 | 1600945 DNA-directed RNA polymerase subunit delta                   | 195  | K   | 4776.0  | 710.1  | 3586.4  | 0       | 0               |
| SITYG_16040 | -    | 1601182 | 1602466 trigger factor                                              | 427  | O   | 3728.2  | 907.1  | 2971.9  | 0       | 0               |
| SITYG_16050 | -    | 1602583 | 1603147 hypothetical protein                                        | 187  | S   | 456.0   | 584.4  | 623.2   | 0       | 0               |
| SITYG_16060 | -    | 1603360 | 1603906 putative membrane protein                                   | 182  | S   | 1072.9  | 480.3  | 1079.2  | 0       | 0               |
| SITYG_16070 | rimD | 1603841 | 1604585 phosphomethylglyminidase                                    | 257  | H   | 348.4   | 340.7  | 544.9   | 0       | 0               |
| SITYG_16080 | fruA | 1604574 | 1605324 RNA pseudouridine synthase A                                | 249  | J   | 2284.3  | 410.2  | 1565.5  | 0       | 0               |
| SITYG_16090 | -    | 1605446 | 1605919 NUDIX family hydrolase                                      | 157  | LR  | 122.5   | 278.2  | 296.6   | 0       | 0               |
| SITYG_16100 | dnaJ | 1605948 | 1607085 chaperone protein DnaJ                                      | 378  | O   | 193.4   | 367.2  | 247.3   | 0       | 0               |
| SITYG_16110 | dnaK | 1607534 | 1609367 chaperone protein DnaK                                      | 610  | O   | 1210.7  | 4951.2 | 1068.3  | 0       | 0               |
| SITYG_16120 | grpE | 1609651 | 1610188 heat shock protein GrpE                                     | 178  | O   | 672.1   | 1063.9 | 635.8   | 1       | alive in vivo   |
| SITYG_16130 | hrcA | 1610223 | 1611258 heat-inducible transcription repressor HrcA                 | 344  | K   | 821.6   | 1146.5 | 844.1   | 0       | 0               |
| SITYG_16140 | -    | 1611421 | 1612150 ABC multidrug transporter permease component                | 242  |     | 227.6   | 934.4  | 592.3   | 0       | 0               |
| SITYG_16150 | -    | 1612142 | 1612982 ABC-type multidrug transport system, ATPase component       | 279  | V   | 222.2   | 470.9  | 382.6   | 0       | 0               |
| SITYG_16160 | -    | 1613023 | 1613596 hypothetical protein                                        | 190  |     | 217.2   | 421.9  | 105.2   | 1       | alive in vivo   |
| SITYG_16170 | -    | 1613595 | 1613919 PadR family transcriptional regulator                       | 107  | K   | 845.0   | 678.2  | 433.9   | 0       | 0               |
| SITYG_16180 | -    | 1614135 | 1614600 D-alanyl-D-alanine carboxypeptidase                         | 154  | M   | 294.4   | 567.1  | 583.1   | 0       | 0               |
| SITYG_16190 | -    | 1614897 | 1615596 putative phosphoglycerate mutase                            | 232  | G   | 1376.8  | 2829.4 | 1178.0  | 0       | 0               |
| SITYG_16200 | -    | 1615910 | 1616453 hypothetical protein                                        | 180  | G   | 99.3    | 566.6  | 684.3   | 7.5     | 0               |
| SITYG_16210 | -    | 1616644 | 1617982 hypothetical protein                                        | 445  | S   | 648.0   | 558.4  | 848.1   | 0       | 0               |
| SITYG_16220 | -    | 1617994 | 1618261 hypothetical protein                                        | 88   | T   | 683.6   | 164.6  | 1090.7  | 0       | 0               |
| SITYG_16230 | -    | 1618371 | 1619376 putative sugar binding transcriptional regulator            | 334  | K   | 111.4   | 546.6  | 589.5   | 5.8     | 0               |
| SITYG_16240 | -    | 1619458 | 1621357 hypothetical protein                                        | 632  |     | 120.1   | 636.4  | 955.8   | 5.1     | 0               |
| SITYG_16250 | -    | 1621926 | 1621926 prepeptidyl transferase YqjC subunit                        | 102  | U   | 219.8   | 640.0  | 97.5    | 0       | 0               |
| SITYG_16260 | -    | 1621927 | 1622743 PTS system, N-acetylglucosamine-specific IIB component      | 271  | G   | 482.9   | 261.0  | 713.8   | 0       | 0               |
| SITYG_16270 | -    | 1622729 | 1623509 PTS system, N-acetylglucosamine-specific IIC component      | 259  | G   | 356.3   | 1436.8 | 708.1   | 0       | 0               |
| SITYG_16280 | -    | 1623524 | 1624016 PTS system, N-acetylglucosamine-specific IIB component      | 163  | G   | 252.9   | 1116.6 | 489.9   | 0       | 0               |
| SITYG_16290 | -    | 1624026 | 1625217 glucuronyl hydrolase                                        | 396  |     | 289.1   | 1125.5 | 758.8   | 2       | vivo-attenuated |
| SITYG_16300 | -    | 1625230 | 1625665 PTS system transporter subunit IIA                          | 144  | G   | 171.6   | 353.6  | 92.3    | 0       | 0               |
| SITYG_16310 | -    | 1625955 | 1626771 gluconate 5-dehydrogenase                                   | 271  | IQR | 76.3    | 296.2  | 36.9    | 0       | 0               |
| SITYG_16320 | -    | 1626786 | 1627428 putative ribose/galactose isomerase                         | 213  | G   | 239.1   | 650.3  | 140.8   | 0       | 0               |
| SITYG_16330 | -    | 1627459 | 1628461 2-keto-3-deoxygluconate kinase                              | 333  | G   | 211.1   | 657.9  | 270.6   | 1       | alive in vivo   |
| SITYG_16340 | -    | 1628470 | 1629100 keto-hydroxyglutarate-aldolase                              | 209  | G   | 164.6   | 383.7  | 302.9   | 0       | 0               |
| SITYG_16350 | -    | 1629250 | 1631278 putative fibrinogen-binding protein                         | 675  | M   | 441.8   | 563.5  | 356.5   | 0       | 0               |
| SITYG_16360 | -    | 1631518 | 1634710 putative hyaluronate lyase protein                          | 1063 | M   | 133.9   | 502.6  | 512.8   | 4.2     | 1               |
| SITYG_16370 | -    | 1635021 | 1635498 glutathione peroxidase                                      | 158  | O   | 173.9   | 414.6  | 147.4   | 0       | 0               |
| SITYG_16380 | -    | 1636775 | 1640042 putative collagen-binding protein                           | 1088 | M   | 174.0   | 302.7  | 276.6   | 2       | vivo-attenuated |
| SITYG_16390 | -    | 1640668 | 1640827 hypothetical protein                                        | 52   |     | 0.0     | 0.0    | 0.0     | 0       | 0               |
| SITYG_16400 | -    | 1641209 | 1641578 hypothetical protein                                        | 122  | S   | 2720.5  | 357.3  | 1986.6  | 0       | 0               |
| SITYG_16410 | -    | 1641564 | 1641840 putative transcriptional regulator                          | 91   | K   | 150.3   | 398.1  | 181.9   | 0       | 0               |
| SITYG_16420 | -    | 1642267 | 1642420 hypothetical protein                                        | 50   |     | 108.4   | 143.6  | 0.0     | <-109.4 | <-143.6         |
| SITYG_16430 | -    | 1642627 | 1642741 hypothetical protein                                        | 0    |     | 0.0     | 0.0    | 0.0     | 0       | 0               |
| SITYG_16440 | -    | 1643033 | 1643768 hypothetical protein                                        | 253  | R   | 75.2    | 576.8  | 382.2   | 5.5     | 2               |
| SITYG_16450 | -    | 1643766 | 1644603 ABC transporter, ATP-binding protein                        | 308  | V   | 89.5    | 853.4  | 173.5   | 0       | 0               |
| SITYG_16460 | -    | 1644743 | 1646798 hypothetical protein                                        | 684  | V   | 82.8    | 684.4  | 332.9   | 4.4     | 1               |
| SITYG_16470 | -    | 1647000 | 1647171 hypothetical protein                                        | 56   |     | 0.0     | 1413.6 | 117.5   | RDIV/91 | -14.4           |
| SITYG_16480 | -    | 1647455 | 1647956 hypothetical protein                                        | 166  |     | 1258.5  | 921.1  | 761.7   | 0       | 0               |
| SITYG_16490 | -    | 1647956 | 1649066 hypothetical protein                                        | 369  | E   | 381.2   | 316.8  | 488.5   | 2       | alive in vivo   |
| SITYG_16500 | -    | 1649936 | 1650728 hypothetical protein                                        | 263  | S   | 78.6    | 388.4  | 393.1   | 5.4     | 0               |
| SITYG_16510 | -    | 1650740 | 1650866 hypothetical protein                                        | 41   | S   | 32.9    | 174.4  | 0.0     | 0       | 0               |
| SITYG_16520 | -    | 1651263 | 1651452 hypothetical protein                                        | 62   |     | 21.9    | 116.3  | 531.3   | 26.4    | 3.8             |
| SITYG_16530 | -    | 1651432 | 1651927 transposase                                                 | 164  | L   | 117.3   | 621.5  | 284.0   | 0       | 0               |
| SITYG_16540 | -    | 1652062 | 1654126 P-type ATPase-metal/cation transporter                      | 687  | P   | 978.8   | 660.1  | 924.4   | 0       | 0               |
| SITYG_16550 | -    | 1654127 | 1654406 hypothetical protein                                        | 92   |     | 26702.9 | 7009.8 | 16448.7 | 0       | 0               |
| SITYG_16560 |      |         |                                                                     |      |     |         |        |         |         |                 |

|             |              |         |                                                                         |      |      |        |         |        |      |                 |               |
|-------------|--------------|---------|-------------------------------------------------------------------------|------|------|--------|---------|--------|------|-----------------|---------------|
| SITYG_16730 | -            | 1668328 | 1668574 putative transcriptional regulator                              | 81   | K    | 16.9   | 268.0   | 0.0    | 0    |                 |               |
| SITYG_16740 | -            | 1668624 | 1669068 hypothetical protein                                            | 147  | D    | 46.7   | 297.0   | 22.6   | 1    | alive in vivo   |               |
| SITYG_16750 | -            | 1669348 | 1669768 -                                                               |      |      | 49.4   | 261.6   | 0.0    | 1    | alive in vivo   |               |
| SITYG_16760 | -            | 1669773 | 1670508 replication initiation factor                                   | 244  | L    | 56.4   | 179.4   | 136.6  | 0    |                 |               |
| SITYG_16770 | -            | 1670631 | 1670802 hypothetical protein                                            | 56   |      | 24.3   | 0.0     | 0.0    | 0    |                 |               |
| SITYG_16780 | -            | 1670861 | 1671122 putative transcriptional regulator                              | 86   |      | 15.9   | 252.6   | 0.0    | 2    | vivo-attenuated |               |
| SITYG_16790 | -            | 1671193 | 1672429 integrase                                                       | 411  | L    | 80.5   | 337.8   | 178.7  | 0    |                 |               |
| SITYG_16800 | <i>rpsI</i>  | 1672520 | 1672913 30S ribosomal protein S9                                        | 130  | J    | 372.0  | 559.2   | 3194.0 | 0    |                 |               |
| SITYG_16810 | <i>rplM</i>  | 1672932 | 1673379 50S ribosomal protein L13                                       | 148  | J    | 1058.5 | 1524.0  | 7188.9 | 0    |                 |               |
| SITYG_16820 | -            | 1673569 | 1674143 hypothetical protein                                            | 289  | S    | 193.7  | 353.9   | 230.9  | 0    | vivo-attenuated |               |
| SITYG_16830 | -            | 1674572 | 1674726 hypothetical protein                                            | 50   |      | 108.4  | 143.6   | 131.3  | 0    |                 |               |
| SITYG_16840 | <i>trmH</i>  | 1674853 | 1675592 RNA methyltransferase                                           | 242  | J    | 386.9  | 512.4   | 330.6  | 1    | vivo-attenuated |               |
| SITYG_16850 | -            | 1675748 | 1676879 Multiple sugar ABC transporter, ATP-binding protein             | 376  | G    | 542.8  | 2059.5  | 461.7  | 0    |                 |               |
| SITYG_16860 | -            | 1676989 | 1677862 including PuR C-terminal helix-turn-helix domain; pfam13556     | 290  | TQ   | 185.3  | 604.1   | 138.0  | 0    |                 |               |
| SITYG_16870 | -            | 1677848 | 1678253 hypothetical protein                                            | 134  | S    | 891.1  | 922.4   | 694.3  | 1    | alive in vivo   |               |
| SITYG_16880 | <i>cysS</i>  | 1678245 | 1679589 cysteinyl-RNA synthetase                                        | 447  | J    | 237.7  | 327.0   | 398.6  | 0    |                 |               |
| SITYG_16890 | -            | 1679606 | 1680128 dihydrofolate reductase                                         | 173  | H    | 206.6  | 126.3   | 57.7   | -3.3 | 0               |               |
| SITYG_16900 | -            | 1680136 | 1680901 putative uridine phosphorylase                                  | 254  |      | 254.9  | 287.3   | 236.3  | 0    |                 |               |
| SITYG_16910 | <i>cysE</i>  | 1680944 | 1681529 serine O-acetyltransferase                                      | 194  | E    | 283.6  | 788.8   | 789.6  | 3.0  | 0               |               |
| SITYG_16920 | <i>prnA</i>  | 1681578 | 1683759 polyribonucleotide nucleotidyltransferase                       | 726  | J    | 475.5  | 574.3   | 372.9  | 0    |                 |               |
| SITYG_16930 | -            | 1684157 | 1685957 oligonucleotidase F                                             | 599  | E    | 336.5  | 586.0   | 585.8  | 0    |                 |               |
| SITYG_16940 | -            | 1686120 | 1686876 hypothetical protein                                            | 251  |      | 137.2  | 465.1   | 239.1  | 0    |                 |               |
| SITYG_16950 | <i>rpsO</i>  | 1687772 | 1688102 ribosomal protein S15                                           | 109  | J    | 264.0  | 133.2   | 273.9  | 0    |                 |               |
| SITYG_16960 | -            | 1688171 | 1688903 pseudouridylylase                                               | 243  | J    | 447.7  | 510.3   | 466.4  | 0    |                 |               |
| SITYG_16970 | -            | 1688889 | 1690062 hypothetical protein                                            | 390  | GEPR | 290.0  | 580.7   | 333.9  | 0    |                 |               |
| SITYG_16980 | -            | 1690191 | 1691565 hypothetical protein                                            | 457  |      | 609.8  | 367.8   | 911.3  | 1    | alive in vivo   |               |
| SITYG_16990 | -            | 1691578 | 1692250 hypothetical protein                                            | 223  |      | 321.0  | 555.9   | 388.5  | 0    |                 |               |
| SITYG_17000 | -            | 1692266 | 1693012 hypothetical protein                                            | 247  |      | 172.8  | 502.1   | 445.4  | 0    |                 |               |
| SITYG_17010 | -            | 1692989 | 1694762 spore coat protein CotH                                         | 590  | M    | 311.2  | 433.8   | 407.8  | 0    |                 |               |
| SITYG_17020 | -            | 1694754 | 1696200 putative membrane protein                                       | 481  | S    | 220.9  | 668.7   | 361.1  | 2    | alive in vivo   |               |
| SITYG_17030 | -            | 1696199 | 1697606 glycosyltransferase                                             | 468  | M    | 265.3  | 1436.9  | 635.2  | 0    |                 |               |
| SITYG_17040 | -            | 1697621 | 1699454 hypothetical protein                                            | 610  | S    | 138.0  | 287.7   | 301.3  | 0    |                 |               |
| SITYG_17050 | -            | 1699466 | 1700366 hypothetical protein                                            | 299  |      | 359.5  | 830.2   | 323.6  | 1    | alive in vivo   |               |
| SITYG_17060 | -            | 1700372 | 1702152 -                                                               |      | MG   | 212.1  | 308.6   | 321.6  | 1    | alive in vivo   |               |
| SITYG_17070 | <i>def</i>   | 1702447 | 1703062 peptide deformylase                                             | 204  | J    | 876.8  | 750.4   | 783.8  | 0    |                 |               |
| SITYG_17080 | -            | 1703123 | 1703354 transglycosylase associated protein                             | 76   | S    | 413.0  | 95.1    | 173.9  | 0    |                 |               |
| SITYG_17090 | <i>pepS</i>  | 1703436 | 1704678 putative aminopeptidase                                         | 413  | E    | 150.3  | 336.2   | 331.5  | 0    |                 |               |
| SITYG_17100 | -            | 1704697 | 1704850 hypothetical protein                                            | 50   |      | 0.0    | 0.0     | 0.0    | 0    |                 |               |
| SITYG_17110 | <i>poiC</i>  | 1704869 | 1709264 DNA polymerase III subunit alpha, Gram-positive type            | 1464 | L    | 197.3  | 355.0   | 242.2  | 0    |                 |               |
| SITYG_17120 | -            | 1709547 | 1710402 5'-nucleotidase                                                 | 284  | R    | 388.1  | 719.6   | 434.6  | 0    |                 |               |
| SITYG_17130 | -            | 1710590 | 1714298 putative alkaline amylopullulanase                              | 1235 | G    | 136.5  | 604.5   | 281.7  | 7    | vivo-attenuated |               |
| SITYG_17140 | <i>leuS</i>  | 1715073 | 1717575 leucine-tRNA ligase                                             | 833  | J    | 412.8  | 474.3   | 469.6  | 1    | alive in vivo   |               |
| SITYG_17150 | -            | 1717715 | 1719611 putative endopeptidase O                                        | 631  | O    | 566.7  | 452.0   | 590.8  | 0    |                 |               |
| SITYG_17160 | -            | 1719786 | 1720506 putative ABC transporter, ATP-binding protein                   | 239  | P    | 2915.2 | 305.2   | 2050.2 | 1    | alive in vivo   |               |
| SITYG_17170 | -            | 1720507 | 1721362 ABC transporter, permease component                             | 284  | P    | 1314.8 | 514.0   | 1491.6 | 0    |                 |               |
| SITYG_17180 | -            | 1721369 | 1722220 putative metal ABC transporter substrate-binding lipoprotein    | 309  | P    | 3091.1 | 1275.9  | 2580.7 | 0    |                 |               |
| SITYG_17190 | -            | 1722474 | 1723126 putative transcriptional regulator                              | 216  | K    | 1650.3 | 607.8   | 1234.0 | 0    |                 |               |
| SITYG_17200 | <i>dit</i>   | 1723188 | 1723632 D-tyrosyl-tRNA(Tyr) deacylase                                   | 147  | J    | 588.6  | 346.4   | 384.5  | 0    |                 |               |
| SITYG_17210 | <i>relA</i>  | 1723711 | 1725928 TK pyrophosphokinase                                            | 738  | TK   | 368.6  | 376.7   | 588.8  | 26   | vivo-attenuated |               |
| SITYG_17220 | -            | 1726546 | 1727290 ribosomal RNA small subunit methyltransferase E                 | 247  | S    | 239.7  | 502.1   | 377.9  | 0    |                 |               |
| SITYG_17230 | <i>prmA</i>  | 1727290 | 1728244 ribosomal protein L11 methyltransferase                         | 317  | J    | 352.2  | 506.8   | 463.2  | 0    |                 |               |
| SITYG_17240 | -            | 1728385 | 1728856 GNAT family acetyltransferase                                   | 156  | KR   | 343.5  | 326.6   | 511.7  | 2    | alive in vivo   |               |
| SITYG_17250 | -            | 1728852 | 1729305 Mut/NUDIX family protein                                        | 150  | LR   | 283.9  | 339.6   | 243.8  | 0    |                 |               |
| SITYG_17260 | -            | 1729314 | 1729785 hypothetical protein                                            | 156  |      | 220.2  | 373.2   | 191.9  | 1    | alive in vivo   |               |
| SITYG_17270 | -            | 1729872 | 1731144 recombination factor protein RarA                               | 423  | L    | 185.9  | 380.1   | 292.1  | 1    | alive in vivo   |               |
| SITYG_17280 | -            | 1732043 | 1732157 putative deoxyribonucleoside kinase                             | 37   | F    | 0.0    | 0.0     | 0.0    | 0    |                 |               |
| SITYG_17290 | -            | 1732311 | 1733079 hypothetical protein                                            | 255  | S    | 502.3  | 600.9   | 549.2  | 0    |                 |               |
| SITYG_17300 | -            | 1733172 | 1733334 hypothetical protein                                            | 53   |      | 0.0    | 0.0     | 0.0    | 0    |                 |               |
| SITYG_17310 | <i>groEL</i> | 1733459 | 1735082 chaperonin GroEL                                                | 540  | O    | 904.8  | 5158.6  | 1020.9 | 0    |                 |               |
| SITYG_17320 | <i>groES</i> | 1735114 | 1735396 co-chaperonin GroES                                             | 93   | O    | 3927.5 | 16286.2 | 2172.2 | 0    |                 |               |
| SITYG_17330 | -            | 1735540 | 1736831 hypothetical protein                                            | 96   |      | 313.6  | 302.1   | 483.1  | 0    |                 |               |
| SITYG_17340 | -            | 1735845 | 1736676 PTS system mannose-specific transporter subunit IID             | 276  | G    | 1063.3 | 449.5   | 495.5  | 2    | alive in vivo   |               |
| SITYG_17350 | -            | 1736677 | 1737526 PTS system mannose-specific transporter subunit IIB             | 282  | G    | 796.4  | 957.7   | 721.5  | 0    |                 |               |
| SITYG_17360 | -            | 1737527 | 1738053 PTS system mannose-specific transporter subunit IIC             | 164  | G    | 385.5  | 266.4   | 200.9  | 0    |                 |               |
| SITYG_17370 | -            | 1738076 | 1738514 PTS system mannose-specific transporter subunit IIA             | 145  | G    | 1430.1 | 1003.4  | 2063.4 | 0    |                 |               |
| SITYG_17380 | -            | 1738761 | 1740048 putative sugar-binding periplasmic protein                      | 428  | G    | 235.3  | 546.4   | 647.6  | 0    |                 |               |
| SITYG_17390 | -            | 1740044 | 1740728 putative transcriptional regulator                              | 227  | TK   | 218.3  | 546.2   | 337.7  | 0    |                 |               |
| SITYG_17400 | -            | 1740720 | 1742043 histidine kinase                                                | 440  | T    | 250.8  | 797.3   | 660.4  | 1    | alive in vivo   |               |
| SITYG_17410 | -            | 1742033 | 1743020 putative periplasmic sugar-binding protein                      | 328  | G    | 340.4  | 534.3   | 478.2  | 1    | vivo-attenuated |               |
| SITYG_17420 | -            | 1743236 | 1743632 single-stranded DNA-binding protein                             | 131  | L    | 83.8   | 166.5   | 380.4  | 4.9  | 0               |               |
| SITYG_17430 | -            | 1743703 | 1744330 phenylalanyl-RNA synthetase subunit beta                        | 208  | R    | 1137.9 | 700.9   | 896.9  | 2    | vivo-attenuated |               |
| SITYG_17440 | -            | 1744346 | 1744664 thioredoxin                                                     | 105  | OC   | 678.3  | 276.4   | 252.6  | 0    |                 |               |
| SITYG_17450 | -            | 1744660 | 1744948 hypothetical protein                                            | 95   |      | 2491.8 | 228.9   | 1534.2 | 0    |                 |               |
| SITYG_17460 | <i>pepA</i>  | 1745067 | 1746132 glutamyl aminopeptidase                                         | 354  | G    | 268.8  | 433.3   | 377.2  | 0    |                 |               |
| SITYG_17470 | -            | 1746268 | 1746619 hypothetical protein                                            | 116  |      | 94.5   | 438.2   | 257.5  | 0    |                 |               |
| SITYG_17480 | -            | 1747267 | 1747426 hypothetical protein                                            | 52   |      | 26.1   | 0.0     | 0.0    | 1    | alive in vivo   |               |
| SITYG_17490 | -            | 1747592 | 1747922 hypothetical protein                                            | 109  |      | 25.1   | 133.2   | 486.9  | 21.1 | 3.0             |               |
| SITYG_17500 | -            | 1747925 | 1748255 hypothetical protein                                            | 109  |      | 364.5  | 865.7   | 121.7  | 1    | alive in vivo   |               |
| SITYG_17510 | -            | 1748576 | 1748864 hypothetical protein                                            | 95   |      | 43.2   | 381.5   | 69.7   | 0    |                 |               |
| SITYG_17520 | -            | 1748273 | 1749849 hypothetical protein                                            | 191  |      | 180.0  | 267.1   | 244.1  | 0    |                 |               |
| SITYG_17530 | -            | 1749845 | 1750427 hypothetical protein                                            | 193  |      | 64.1   | 188.8   | 327.8  | 5.6  | 1               | alive in vivo |
| SITYG_17540 | -            | 1750428 | 1750952 hypothetical protein                                            | 51   |      | 39.8   | 261.7   | 60.0   | 0    |                 |               |
| SITYG_17550 | -            | 1750748 | 1750934 hypothetical protein                                            | 61   |      | 66.9   | 708.9   | 54.0   | 0    |                 |               |
| SITYG_17560 | -            | 1751399 | 1751624 hypothetical protein                                            | 74   |      | 184.4  | 195.3   | 89.3   | 0    |                 |               |
| SITYG_17570 | -            | 1751723 | 1752056 hypothetical protein                                            | 110  |      | 199.3  | 329.9   | 331.7  | 0    |                 |               |
| SITYG_17580 | -            | 1752052 | 1754203 hypothetical protein                                            | 716  |      | 478.3  | 551.7   | 508.9  | 3    | vivo-attenuated |               |
| SITYG_17590 | -            | 1754336 | 1754894 hypothetical protein                                            | 185  | S    | 646.8  | 433.2   | 575.9  | 0    |                 |               |
| SITYG_17600 | -            | 1755075 | 1756401 dihydrofolate synthetase                                        | 441  | H    | 168.9  | 546.9   | 204.5  | 2    | alive in vivo   |               |
| SITYG_17610 | -            | 1756581 | 1757220 putative membrane protein                                       | 212  |      | 71.4   | 275.1   | 157.2  | 0    |                 |               |
| SITYG_17620 | -            | 1757496 | 1757793 hypothetical protein                                            | 98   |      | 572.6  | 148.0   | 574.8  | 0    |                 |               |
| SITYG_17630 | -            | 1757809 | 1758202 hypothetical protein                                            | 130  |      | 1646.6 | 1174.2  | 1149.8 | 0    |                 |               |
| SITYG_17640 | -            | 1758183 | 1759515 hypothetical protein                                            | 443  |      | 576.1  | 725.9   | 573.0  | 1    | alive in vivo   |               |
| SITYG_17650 | -            | 1759507 | 1759894 hypothetical protein                                            | 128  |      | 1318.4 | 965.3   | 622.8  | 1    | alive in vivo   |               |
| SITYG_17660 | -            | 1760134 | 1760527 hypothetical protein                                            | 130  |      | 179.4  | 335.5   | 306.6  | 0    |                 |               |
| SITYG_17670 | -            | 1760546 | 1760771 hypothetical protein                                            | 74   |      | 73.7   | 586.0   | 133.9  | 0    |                 |               |
| SITYG_17680 | -            | 1760773 | 1761160 hypothetical protein                                            | 128  |      | 192.9  | 283.9   | 596.8  | 3.4  | 0               |               |
| SITYG_17690 | -            | 1761340 | 1763200 prolyl-tRNA synthetase                                          | 619  | J    | 368.0  | 378.1   | 448.1  | 0    |                 |               |
| SITYG_17700 | -            | 1763233 | 1764505 zinc metalloprotease                                            | 423  | M    | 300.0  | 431.9   | 521.0  | 2    | alive in vivo   |               |
| SITYG_17710 | <i>cdsA</i>  | 1764656 | 1765460 phosphatidate cytidyltransferase                                | 267  | I    | 706.8  | 738.0   | 849.3  | 0    |                 |               |
| SITYG_17720 | <i>uppS</i>  | 1765468 | 1766218 undecaprenyl pyrophosphate synthetase                           | 249  | I    | 653.7  | 322.3   | 696.2  | 0    |                 |               |
| SITYG_17730 | <i>yjjC</i>  | 1766886 | 1767024 prepilin translocase subunit YajC                               | 112  | U    | 8675.7 | 583.4   | 5243.2 | 1    | alive in vivo   |               |
| SITYG_17740 | -            | 1767426 | 1767606 hypothetical protein                                            | 59   | S    | 599.2  | 366.2   | 390.5  | 0    |                 |               |
| SITYG_17750 | <i>ikt</i>   | 1767701 | 1769678 transketolase                                                   | 658  | G    | 352.5  | 611.3   | 665.4  | 0    |                 |               |
| SITYG_17760 | -            | 1769818 | 1770910 putative L-ascorbate 6-phosphate lactonase                      | 363  | R    | 53.2   | 382.3   | 101.2  | 0    |                 |               |
| SITYG_17770 | -            | 1771071 | 1772742 hypothetical protein                                            | 556  | K    | 136.5  | 486.6   | 270.4  | 0    |                 |               |
| SITYG_17780 | -            | 1772945 | 1773653 putative L-ribulose-5-phosphate 4-epimerase                     | 235  | G    | 35.2   | 279.3   | 496.4  | 15.4 | 0               |               |
| SITYG_17790 | -            | 1773655 | 1774519 L-ribulose-5-phosphate 3-epimerase                              | 287  | G    | 33.6   | 330.6   | 139.5  | 4.5  | 0               |               |
| SITYG_17800 | -            | 1774524 | 1775190 putative 3-keto-L-gulonate-6-phosphate decarboxylase            | 221  | G    | 112.1  | 989.8   | 316.6  | 3.1  | -3.8            |               |
| SITYG_17810 | -            | 1775235 | 1775721 putative phosphotransferase system sugar-specific EII component | 161  | GT   | 76.8   | 271.3   | 0.0    | 0    |                 |               |
| SITYG_17820 | -            | 1775922 | 1776204 putative phosphotransferase system sugar-specific EII component | 93   | G    | 117.7  | 311.7   | 35.6   | -3.0 | -10.6           |               |
| SITYG_17830 | -            | 1776234 | 1777695 PTS system ascorbate-specific transporter subunit IIC           | 486  | S    | 76.7   | 571.6   | 176.7  | 0    |                 |               |
| SITYG_17840 | <i>clpL</i>  | 1777862 | 1779992 ATP-dependent Clp protease ATP-binding subunit                  | 709  | O    | 467.4  | 9336.6  | 650.6  | 2    | alive in vivo   |               |
| SITYG_17850 | -            | 1780369 | 1780675 hypothetical protein                                            | 101  |      | 1559.0 | 359.1   | 1476.8 | 0    |                 |               |
| SITYG_17860 | -            | 1780674 | 1781085 hypothetical protein                                            | 136  |      | 1281.8 | 588.1   | 1417.1 | 0    |                 |               |
| SITYG_17870 | -            | 1781066 |                                                                         |      |      |        |         |        |      |                 |               |

|             |       |         |         |                                                                    |      |       |        |        |        |      |       |
|-------------|-------|---------|---------|--------------------------------------------------------------------|------|-------|--------|--------|--------|------|-------|
| SITYG_18020 | -     | 1790604 | 1790898 | hypothetical protein                                               | 97   | NU    | 28.2   | 74.7   | 136.6  | 5.3  | 0     |
| SITYG_18030 | comYD | 1790869 | 1791298 | competence protein ComYD                                           | 142  | NU    | 67.7   | 409.8  | 93.6   | 0    | 0     |
| SITYG_18040 | comYC | 1791257 | 1791575 | competence protein ComYC                                           | 105  | U     | 39.1   | 276.4  | 63.2   | 0    | 0     |
| SITYG_18050 | comYB | 1791571 | 1792657 | competence protein ComYB                                           | 361  | NU    | 87.9   | 768.9  | 295.9  | 3.7  | 1     |
| SITYG_18060 | comYA | 1792535 | 1793477 | competence protein ComYA                                           | 313  | NU    | 26.4   | 303.3  | 117.3  | 4.8  | -3.3  |
| SITYG_18070 | -     | 1793545 | 1793911 | hypothetical protein                                               | 121  | S     | 816.0  | 300.2  | 411.6  | 0    | 1     |
| SITYG_18080 | -     | 1794039 | 1794756 | hypothetical protein                                               | 238  |       | 225.6  | 459.7  | 112.0  | 0    | 1     |
| SITYG_18090 | -     | 1794730 | 1796347 | hypothetical protein                                               | 538  |       | 436.1  | 557.2  | 428.5  | 5    | 1     |
| SITYG_18100 | glnA  | 1796542 | 1797889 | glutamine synthetase type I                                        | 448  | E     | 1478.2 | 636.2  | 1110.8 | 0    | 0     |
| SITYG_18110 | glnR  | 1797927 | 1798297 | putative transcription regulator                                   | 119  | K     | 2730.9 | 305.2  | 2175.8 | 0    | 0     |
| SITYG_18120 | -     | 1798265 | 1798804 | hypothetical protein                                               | 176  | S     | 359.4  | 496.6  | 453.9  | 0    | 0     |
| SITYG_18130 | -     | 1799068 | 1790749 | hypothetical protein                                               | 226  | R     | 1011.2 | 968.0  | 634.1  | 3    | 1     |
| SITYG_18140 | -     | 1800155 | 1804088 | putative glucan-binding protein                                    | 1310 | LPXTG | 2319.3 | 681.6  | 1807.7 | 2    | 1     |
| SITYG_18150 | pgkI  | 1804418 | 1805615 | phosphoglycerate kinase                                            | 398  | G     | 4383.8 | 1266.7 | 2860.7 | 0    | 0     |
| SITYG_18160 | rpoC  | 1805746 | 1809385 | DNA-directed RNA polymerase subunit beta                           | 1212 | K     | 874.3  | 766.9  | 888.6  | 0    | 0     |
| SITYG_18170 | rpoB  | 1809423 | 1812990 | DNA-directed RNA polymerase subunit beta                           | 1188 | K     | 853.6  | 548.3  | 771.4  | 0    | 0     |
| SITYG_18180 | -     | 1813276 | 1819619 | putative membrane carboxypeptidase                                 | 780  | M     | 394.8  | 365.8  | 518.6  | 2    | 1     |
| SITYG_18190 | tyrS  | 1815800 | 1817057 | tyrosyl-tRNA synthetase                                            | 418  | J     | 841.5  | 489.5  | 711.0  | 0    | 0     |
| SITYG_18200 | rnaA  | 1817300 | 1818137 | rRNA (guanine-N1)-methyltransferase A                              | 278  | QR    | 163.5  | 446.3  | 347.9  | 1    | 1     |
| SITYG_18210 | -     | 1818194 | 1818875 | peptidase S54                                                      | 226  | R     | 170.6  | 580.8  | 162.2  | 1    | 1     |
| SITYG_18220 | -     | 1818867 | 1819395 | 5-formyltetrahydrofolate cyclo-ligase                              | 175  | H     | 204.3  | 624.3  | 285.3  | 0    | 0     |
| SITYG_18230 | hipO  | 1819440 | 1820571 | putative N-acetyldiaminopimelate deacetylase                       | 376  | R     | 542.8  | 796.6  | 515.0  | 0    | 0     |
| SITYG_18240 | dapD  | 1820583 | 1821282 | 2,3,4,5-tetrahydropyridine-2,6-dicarboxylate N-acetyltransferase   | 232  | E     | 468.8  | 785.9  | 517.2  | 0    | 0     |
| SITYG_18250 | gltX  | 1821399 | 1822857 | glutamyl-tRNA synthetase                                           | 485  | J     | 1448.2 | 512.4  | 1164.0 | 0    | 0     |
| SITYG_18260 | radA  | 1823065 | 1824481 | DNA repair protein RadA                                            | 471  | O     | 149.4  | 388.0  | 361.7  | 0    | 0     |
| SITYG_18270 | -     | 1824438 | 1824909 | hypothetical protein                                               | 156  | Q     | 158.5  | 46.7   | 149.2  | 0    | 0     |
| SITYG_18280 | -     | 1824918 | 1825362 | deoxydinucleotide 5'-triphosphate nucleotidohydrolase              | 147  | F     | 317.7  | 247.5  | 384.5  | 0    | 0     |
| SITYG_18290 | -     | 1825455 | 1826490 | putative LD-carboxypeptidase                                       | 344  | V     | 160.3  | 615.7  | 126.1  | 0    | 0     |
| SITYG_18300 | gpsA  | 1827555 | 1828570 | NAD(P)H-dependent glycerol-3-phosphate dehydrogenase               | 338  | C     | 240.7  | 540.2  | 760.3  | 3.4  | 0     |
| SITYG_18310 | galU  | 1828595 | 1829495 | UTP-glucose-1-phosphate uridylyltransferase                        | 299  | M     | 470.1  | 317.4  | 457.5  | 0    | 0     |
| SITYG_18320 | -     | 1829591 | 1829954 | hypothetical protein                                               | 120  | L     | 57.1   | 363.2  | 55.3   | 0    | 0     |
| SITYG_18330 | -     | 1829964 | 1830099 | hypothetical protein                                               | 44   |       | 30.7   | 162.8  | 0.0    | 0    | 0     |
| SITYG_18340 | -     | 1830786 | 1831194 | hypothetical protein                                               | 135  | S     | 691.4  | 484.7  | 1058.3 | 0    | 0     |
| SITYG_18350 | -     | 1831223 | 1831541 | predicted transcriptional regulators                               | 105  | K     | 287.0  | 414.6  | 31.6   | -3.4 | -15.7 |
| SITYG_18360 | -     | 1831821 | 1832115 | putative integrase                                                 | 97   | L     | 56.4   | 149.5  | 102.5  | 1    | 1     |
| SITYG_18370 | -     | 1835859 | 1839063 | putative transcriptional regulator                                 | 157  |       | 131.3  | 1066.3 | 233.0  | 0    | 0     |
| SITYG_18380 | rplQ  | 1839992 | 1840379 | 50S ribosomal protein L17                                          | 128  | J     | 6313.4 | 851.7  | 3866.3 | 0    | 0     |
| SITYG_18390 | rpoA  | 1840390 | 1841329 | DNA-directed RNA polymerase subunit alpha                          | 312  | K     | 2924.5 | 561.7  | 2342.1 | 0    | 0     |
| SITYG_18400 | rpsK  | 1841373 | 1841757 | 30S ribosomal protein S11                                          | 127  | J     | 1220.7 | 286.1  | 993.7  | 0    | 0     |
| SITYG_18410 | rpsM  | 1841776 | 1842142 | 30S ribosomal protein S13                                          | 121  | J     | 5270.2 | 480.3  | 3292.5 | 0    | 0     |
| SITYG_18420 | rpmJ  | 1842157 | 1842274 | 50S ribosomal protein L36                                          | 38   | J     | 815.5  | 375.6  | 944.1  | 0    | 0     |
| SITYG_18430 | -     | 1842286 | 1842517 | translation initiation factor IF-1                                 | 72   | J     | 4754.3 | 301.0  | 3347.3 | 0    | 0     |
| SITYG_18440 | adk   | 1842632 | 1843271 | adenylate kinase                                                   | 212  | F     | 1337.3 | 653.4  | 927.2  | 0    | 0     |
| SITYG_18450 | secY  | 1843480 | 1844788 | preprotein translocase subunit SecY                                | 435  | U     | 1604.7 | 899.4  | 1190.0 | 0    | 0     |
| SITYG_18460 | rplO  | 1844800 | 1845241 | 50S ribosomal protein L15                                          | 146  | J     | 705.5  | 299.0  | 592.0  | 0    | 0     |
| SITYG_18470 | -     | 1845400 | 1845583 | 50S ribosomal protein L30                                          | 60   | J     | 1972.1 | 240.2  | 1810.8 | 0    | 0     |
| SITYG_18480 | rpsE  | 1845596 | 1846001 | 30S ribosomal protein S5                                           | 164  | J     | 4131.4 | 1553.8 | 2454.7 | 0    | 0     |
| SITYG_18490 | rplR  | 1846109 | 1846486 | 50S ribosomal protein L18                                          | 118  | J     | 708.8  | 430.9  | 534.4  | 0    | 0     |
| SITYG_18500 | rplP  | 1846547 | 1847094 | 50S ribosomal protein L6                                           | 178  | J     | 741.6  | 409.2  | 796.7  | 0    | 0     |
| SITYG_18510 | rpsH  | 1847279 | 1847678 | 30S ribosomal protein S8                                           | 132  | J     | 4283.3 | 716.0  | 3422.8 | 0    | 0     |
| SITYG_18520 | rpsN  | 1847859 | 1848045 | 30S ribosomal protein S14                                          | 61   | J     | 1672.7 | 118.1  | 863.8  | 0    | 0     |
| SITYG_18530 | rplE  | 1848062 | 1848605 | 50S ribosomal protein L5                                           | 180  | J     | 886.2  | 971.3  | 1183.6 | 0    | 0     |
| SITYG_18540 | rplX  | 1848628 | 1848934 | 50S ribosomal protein L24                                          | 101  | J     | 1870.7 | 359.1  | 1476.8 | 0    | 0     |
| SITYG_18550 | rplN  | 1849010 | 1849379 | 50S ribosomal protein L14                                          | 122  | J     | 1090.4 | 952.8  | 898.1  | 0    | 0     |
| SITYG_18560 | rpsQ  | 1849404 | 1849665 | 30S ribosomal protein S17                                          | 86   | J     | 683.4  | 673.6  | 846.5  | 0    | 0     |
| SITYG_18570 | rpmC  | 1849688 | 1849895 | 50S ribosomal protein L29                                          | 68   | J     | 2044.0 | 636.9  | 873.2  | 0    | 0     |
| SITYG_18580 | rplP  | 1849904 | 1850318 | 50S ribosomal protein L16                                          | 137  | J     | 3607.1 | 796.2  | 3007.7 | 0    | 0     |
| SITYG_18590 | rpsC  | 1850321 | 1850975 | 30S ribosomal protein S3                                           | 217  | J     | 608.9  | 403.2  | 506.7  | 0    | 0     |
| SITYG_18600 | rplV  | 1850987 | 1851332 | 50S ribosomal protein L22                                          | 114  | J     | 3991.9 | 1146.5 | 2939.8 | 0    | 0     |
| SITYG_18610 | -     | 1851346 | 1851625 | 30S ribosomal protein S19                                          | 92   | J     | 6095.9 | 393.8  | 3059.4 | 0    | 0     |
| SITYG_18620 | rplB  | 1851726 | 1852560 | 50S ribosomal protein L2                                           | 277  | J     | 1517.0 | 553.3  | 1264.3 | 0    | 0     |
| SITYG_18630 | rplW  | 1852577 | 1852874 | 50S ribosomal protein L23                                          | 98   | J     | 8128.7 | 2367.6 | 5680.3 | 0    | 0     |
| SITYG_18640 | rplD  | 1852873 | 1853497 | 50S ribosomal protein L4                                           | 207  | J     | 850.9  | 387.4  | 563.3  | 0    | 0     |
| SITYG_18650 | rplC  | 1853291 | 1854146 | 50S ribosomal protein L3                                           | 208  | J     | 3638.7 | 806.1  | 3233.3 | 0    | 0     |
| SITYG_18660 | rpsJ  | 1854232 | 1854541 | 30S ribosomal protein S10                                          | 102  | J     | 1933.1 | 284.5  | 1462.4 | 0    | 0     |
| SITYG_18670 | -     | 1854846 | 1855689 | -                                                                  | 0    |       | 362.9  | 532.4  | 432.5  | 0    | 0     |
| SITYG_18680 | lgtI  | 1855515 | 1856658 | queuine tRNA-ribosyltransferase                                    | 380  | J     | 413.7  | 499.9  | 307.5  | 0    | 0     |
| SITYG_18690 | -     | 1856843 | 1857689 | hypothetical protein                                               | 281  | S     | 916.9  | 753.3  | 973.3  | 0    | 0     |
| SITYG_18700 | -     | 1857946 | 1858441 | hypothetical protein                                               | 164  |       | 460.9  | 177.6  | 547.7  | 0    | 0     |
| SITYG_18710 | -     | 1858441 | 1858879 | putative CoA-binding protein                                       | 145  | R     | 113.6  | 200.7  | 45.9   | 0    | 0     |
| SITYG_18720 | polA  | 1859044 | 1861690 | DNA polymerase I                                                   | 881  | L     | 316.7  | 606.3  | 463.0  | 4    | 1     |
| SITYG_18730 | -     | 1861790 | 1862333 | phosphoglycerate mutase                                            | 180  | G     | 152.8  | 283.3  | 462.3  | 3.3  | 0     |
| SITYG_18740 | -     | 1862510 | 1862669 | hypothetical protein                                               | 52   |       | 208.7  | 829.2  | 126.3  | 0    | 0     |
| SITYG_18750 | -     | 1862675 | 1862891 | hypothetical protein                                               | 71   |       | 499.3  | 406.9  | 325.4  | 0    | 0     |
| SITYG_18760 | -     | 1862958 | 1863726 | putative HAD-superfamily hydrolase                                 | 255  | R     | 270.1  | 400.6  | 300.7  | 0    | 0     |
| SITYG_18770 | -     | 1863728 | 1865423 | putative phosphotransferase system IIB components                  | 564  | G     | 384.2  | 324.1  | 319.9  | 1    | 1     |
| SITYG_18780 | -     | 1865579 | 1866338 | transcriptional regulator                                          | 252  | K     | 174.9  | 608.0  | 344.0  | 0    | 0     |
| SITYG_18790 | -     | 1866379 | 1867411 | signal transduction histidine kinase                               | 343  | T     | 124.6  | 319.4  | 262.7  | 1    | 1     |
| SITYG_18800 | -     | 1867412 | 1868099 | DNA-binding response regulator                                     | 228  | TK    | 271.7  | 543.8  | 321.6  | 2    | 1     |
| SITYG_18810 | -     | 1868197 | 1870741 | putative fibronectin-binding protein                               | 847  | LPXTG | 94.6   | 501.0  | 378.9  | 4.4  | 0     |
| SITYG_18820 | -     | 1871020 | 1871191 | hypothetical protein                                               | 56   |       | 194.1  | 642.5  | 293.6  | 0    | 0     |
| SITYG_18830 | -     | 1875774 | 1872969 | putative polysaccharide biosynthesis protein                       | 461  |       | 496.8  | 837.9  | 655.1  | 1    | 1     |
| SITYG_18840 | -     | 1875976 | 1873954 | hypothetical protein                                               | 325  |       | 687.1  | 741.5  | 862.5  | 1    | 1     |
| SITYG_18850 | -     | 1875962 | 1875027 | hypothetical protein                                               | 354  |       | 506.3  | 474.6  | 688.3  | 0    | 0     |
| SITYG_18860 | -     | 1875023 | 1876001 | glycosyl transferase 2 family protein                              | 325  | M     | 772.0  | 651.6  | 708.5  | 0    | 0     |
| SITYG_18870 | -     | 1876039 | 1877173 | putative glycosyl transferase                                      | 377  | M     | 534.1  | 562.0  | 628.7  | 2    | 1     |
| SITYG_18880 | -     | 1877169 | 1877787 | putative Acyltransferase                                           | 205  | R     | 637.7  | 391.1  | 991.2  | 0    | 0     |
| SITYG_18890 | -     | 1877779 | 1878409 | sugar transferase                                                  | 209  | M     | 737.5  | 732.5  | 699.5  | 0    | 0     |
| SITYG_18900 | -     | 1878431 | 1879685 | aminotransferase DegT                                              | 417  | M     | 1108.2 | 963.8  | 1177.2 | 1    | 1     |
| SITYG_18910 | -     | 1879725 | 1881534 | hypothetical protein                                               | 602  | MG    | 1112.1 | 741.0  | 1021.4 | 0    | 0     |
| SITYG_18920 | -     | 1881558 | 1882251 | tyrosine kinase                                                    | 230  | D     | 610.6  | 507.4  | 565.1  | 0    | 0     |
| SITYG_18930 | -     | 1882261 | 1882957 | capsular polysaccharide biosynthesis protein                       | 231  | M     | 417.2  | 410.4  | 418.4  | 0    | 0     |
| SITYG_18940 | -     | 1882965 | 1883703 | capsular polysaccharide biosynthesis protein                       | 245  | GM    | 393.5  | 416.9  | 244.9  | 1    | 1     |
| SITYG_18950 | -     | 1883699 | 1885145 | transcriptional regulator                                          | 481  | K     | 490.6  | 607.9  | 826.4  | 1    | 1     |
| SITYG_18960 | nrdG  | 1885319 | 1885925 | anaerobic ribonucleoside-triphosphate reductase activating protein | 201  | O     | 787.2  | 761.5  | 679.4  | 0    | 0     |
| SITYG_18970 | -     | 1885929 | 1886436 | acetyltransferase                                                  | 168  | R     | 1587.3 | 823.5  | 1525.1 | 0    | 0     |
| SITYG_18980 | -     | 1886439 | 1886943 | putative acetyltransferase                                         | 167  | R     | 716.1  | 784.8  | 916.5  | 2    | 1     |
| SITYG_18990 | -     | 1886999 | 1887143 | hypothetical protein                                               | 47   |       | 288.1  | 152.6  | 278.9  | 0    | 0     |
| SITYG_19000 | -     | 1887151 | 1889362 | anaerobic ribonucleoside-triphosphate reductase                    | 736  | F     | 919.3  | 695.7  | 772.1  | 0    | 0     |
| SITYG_19010 | -     | 1889468 | 1891010 | putative membrane protein                                          | 513  |       | 575.7  | 555.8  | 521.0  | 2    | 1     |
| SITYG_19020 | -     | 1891071 | 1891200 | hypothetical protein                                               | 42   |       | 64.3   | 340.7  | 0.0    | 0    | 0     |
| SITYG_19030 | -     | 1891264 | 1892797 | cardiolipin synthetase                                             | 510  | I     | 294.1  | 444.4  | 196.5  | 0    | 0     |
| SITYG_19040 | -     | 1893132 | 1893670 | hypothetical protein                                               | 145  |       | 710.3  | 1003.4 | 435.6  | 0    | 0     |
| SITYG_19050 | -     | 1893615 | 1894857 | dihydrofolate synthase                                             | 413  | H     | 918.5  | 796.2  | 929.8  | 0    | 0     |
| SITYG_19060 | -     | 1895055 | 1895361 | hypothetical protein                                               | 101  | S     | 5449.6 | 1364.4 | 3872.4 | 0    | 0     |
| SITYG_19070 | -     | 1895378 | 1895789 | holliday junction resolvase-like protein                           | 136  | L     | 4380.3 | 1871.3 | 4593.4 | 0    | 0     |
| SITYG_19080 | -     | 1895797 | 1896106 | hypothetical protein                                               | 102  | S     | 5557.7 |        |        |      |       |

|             |             |         |                                                                              |     |      |        |        |        |        |                 |                 |
|-------------|-------------|---------|------------------------------------------------------------------------------|-----|------|--------|--------|--------|--------|-----------------|-----------------|
| SITYG_19310 | -           | 1919770 | 1920613 ABC transporter, permease protein                                    | 280 | G    | 83.7   | 312.8  | 95.3   | 1      | alive in vivo   |                 |
| SITYG_19320 | <i>malA</i> | 1920710 | 1921523 putative membrane protein                                            | 270 | S    | 117.4  | 162.2  | 172.9  | 0      |                 |                 |
| SITYG_19330 | <i>malR</i> | 1921533 | 1922520 transcriptional regulators                                           | 328 | K    | 138.7  | 356.2  | 213.7  | 0      |                 |                 |
| SITYG_19340 | -           | 1922533 | 1924609 pullulanase, type I                                                  | 691 | G    | 171.8  | 550.4  | 314.4  | 1      | alive in vivo   |                 |
| SITYG_19350 | -           | 1924820 | 1925756 hypothetical protein                                                 | 311 | S    | 1369.4 | 493.0  | 976.3  | 0      |                 |                 |
| SITYG_19360 | <i>aspS</i> | 1925742 | 1927485 aspartyl-tRNA synthetase                                             | 580 | J    | 540.2  | 491.7  | 414.8  | 0      |                 |                 |
| SITYG_19370 | -           | 1927615 | 1927822 hypothetical protein                                                 | 68  |      | 20.0   | 0.0    | 0.0    | 0      |                 |                 |
| SITYG_19380 | <i>hisS</i> | 1927894 | 1929175 histidyl-tRNA synthetase                                             | 426 | J    | 534.3  | 463.2  | 486.0  | 0      |                 |                 |
| SITYG_19390 | <i>rpmF</i> | 1929401 | 1929594 50S ribosomal protein L32                                            | 60  | J    | 7095.0 | 600.4  | 4719.2 | 0      |                 |                 |
| SITYG_19400 | -           | 1929599 | 1929749 50S ribosomal protein L33                                            | 49  | J    | 110.6  | 0.0    | 0.0    | 0      |                 |                 |
| SITYG_19410 | -           | 1929636 | 1931120 hypothetical protein                                                 | 427 | MG   | 145.4  | 273.8  | 156.4  | 0      |                 |                 |
| SITYG_19420 | -           | 1931198 | 1932694 -                                                                    | L   | 77.6 | 587.6  | 322.2  | 4.5    | 1      | alive in vivo   |                 |
| SITYG_19430 | -           | 1932713 | 1932962 hypothetical protein                                                 | 82  | L    | 16.7   | 88.3   | 40.3   | 0      |                 |                 |
| SITYG_19440 | -           | 1933023 | 1934040 putative replication initiation factor                               | 338 | L    | 85.7   | 432.1  | 464.1  | 5.3    | 1               | alive in vivo   |
| SITYG_19450 | -           | 1934044 | 1934464 hypothetical protein                                                 | 139 |      | 39.5   | 209.3  | 167.4  | 4.6    | 0               |                 |
| SITYG_19460 | -           | 1934733 | 1935831 cell division protein FtsK                                           | 365 | D    | 83.1   | 560.4  | 503.0  | 6.6    | 2               | vivo-attenuated |
| SITYG_19470 | -           | 1936122 | 1936344 hypothetical protein                                                 | 73  |      | 74.7   | 0.0    | 0.0    | 0      |                 |                 |
| SITYG_19480 | -           | 1936390 | 1936714 hypothetical protein                                                 | 107 |      | 25.6   | 271.3  | 217.0  | 0.2    | 1               | alive in vivo   |
| SITYG_19490 | -           | 1936902 | 1937409 hypothetical protein                                                 | 168 |      | 1472.7 | 346.7  | 1564.7 | 0      |                 |                 |
| SITYG_19500 | -           | 1937866 | 1939108 hypothetical protein                                                 | 413 | GEPR | 43.4   | 230.0  | 40.4   | 2      | alive in vivo   |                 |
| SITYG_19510 | -           | 1939110 | 1941020 -                                                                    |     | RTKL | 89.0   | 563.7  | 199.8  | 3      | alive in vivo   |                 |
| SITYG_19520 | -           | 1941542 | 1942412 transcriptional activator                                            | 289 | K    | 400.5  | 833.5  | 531.0  | 1      | alive in vivo   |                 |
| SITYG_19530 | -           | 1942611 | 1942734 hypothetical protein                                                 | 40  |      | 33.7   | 178.7  | 979.7  | 31.6   | 4.6             | 0               |
| SITYG_19540 | -           | 1942991 | 1944899 cadmium-translocating P-type ATPase                                  | 635 | P    | 258.7  | 541.3  | 394.7  | 0      |                 |                 |
| SITYG_19550 | -           | 1945212 | 1945368 hypothetical protein                                                 | 51  |      | 26.6   | 140.9  | 386.2  | 15.8   | 0               |                 |
| SITYG_19560 | -           | 1945532 | 1945655 hypothetical protein                                                 | 40  | KR   | 0.0    | 0.0    | 979.7  | >979.7 | >979.7          | 0               |
| SITYG_19570 | -           | 1945674 | 1945788 hypothetical protein                                                 | 37  |      | 145.5  | 192.8  | 0.0    | <145.5 | <192.8          | 0               |
| SITYG_19580 | -           | 1945824 | 1946694 putative cation diffusion facilitator family transporter             | 289 | P    | 275.5  | 1086.1 | 450.2  | 2      | vivo-attenuated |                 |
| SITYG_19590 | -           | 1946864 | 1947386 transcriptional regulator, TetR family                               | 173 | K    | 71.5   | 84.2   | 102.4  | 0      |                 |                 |
| SITYG_19600 | -           | 1947450 | 1948620 major facilitator superfamily transporter                            | 389 | P    | 425.5  | 619.8  | 557.9  | 0      |                 |                 |
| SITYG_19610 | -           | 1948480 | 1949437 DNA-3-methyladenine glycosylase                                      | 198 | L    | 194.6  | 294.5  | 201.8  | 0      |                 |                 |
| SITYG_19620 | -           | 1949693 | 1950440 transcriptional regulator, DeoR family                               | 248 | KG   | 405.4  | 823.7  | 403.3  | 1      | alive in vivo   |                 |
| SITYG_19630 | -           | 1950458 | 1951286 hypothetical protein                                                 | 275 | R    | 305.6  | 743.1  | 218.3  | 1      | alive in vivo   |                 |
| SITYG_19640 | -           | 1951524 | 1952016 putative acetyltransferase                                           | 163 | KR   | 404.7  | 312.6  | 183.7  | 0      |                 |                 |
| SITYG_19650 | <i>ditD</i> | 1952068 | 1953337 D-alanyl-lipoteichoic acid biosynthesis DiID                         | 422 | M    | 405.3  | 363.6  | 284.9  | 0      |                 |                 |
| SITYG_19660 | -           | 1953329 | 1953569 D-alanine--poly(phosphoribitol) ligase subunit 2                     | 79  | IQ   | 2730.9 | 1007.2 | 1799.2 | 0      |                 |                 |
| SITYG_19670 | <i>ditB</i> | 1953583 | 1954828 D-alanyl-lipoteichoic acid biosynthesis protein DiIB                 | 414 | M    | 859.6  | 776.6  | 1169.5 | 0      |                 |                 |
| SITYG_19680 | <i>ditA</i> | 1954824 | 1956375 D-alanine--poly(phosphoribitol) ligase subunit 1                     | 516 | Q    | 829.1  | 396.7  | 822.3  | 0      |                 |                 |
| SITYG_19690 | -           | 1956384 | 1956516 D-Ala-teichoic acid biosynthesis protein                             | 43  |      | 2734.0 | 665.9  | 3119.1 | 0      |                 |                 |
| SITYG_19700 | -           | 1956808 | 1957135 transcriptional regulator, PadR family                               | 108 | K    | 329.8  | 403.2  | 859.9  | 0      |                 |                 |
| SITYG_19710 | -           | 1957121 | 1958123 hypothetical protein                                                 | 333 | S    | 414.0  | 943.0  | 501.1  | 2      | alive in vivo   |                 |
| SITYG_19720 | -           | 1958132 | 1958753 HAD superfamily hydrolase                                            | 206 | R    | 400.8  | 1026.2 | 388.1  | 1      | alive in vivo   |                 |
| SITYG_19730 | -           | 1958980 | 1960435 hypothetical protein                                                 | 484 |      | 225.2  | 573.9  | 179.4  | 0      |                 |                 |
| SITYG_19740 | -           | 1960448 | 1961129 hypothetical protein                                                 | 226 |      | 91.4   | 451.8  | 280.2  | 3.3    | 0               |                 |
| SITYG_19750 | -           | 1961109 | 1961844 hypothetical protein                                                 | 244 |      | 440.2  | 209.3  | 273.3  | 0      |                 |                 |
| SITYG_19760 | -           | 1962001 | 1962391 hypothetical protein                                                 | 129 | GEPR | 191.5  | 676.1  | 978.4  | 5.6    | 0               |                 |
| SITYG_19770 | -           | 1962484 | 1962649 hypothetical protein                                                 | 54  |      | 100.6  | 153.2  | 1338.9 | 14.5   | 0               |                 |
| SITYG_19780 | -           | 1962803 | 1963322 bacteriocin transport accessory protein                              | 172 | OC   | 55.9   | 423.4  | 561.1  | 10.9   | 0               |                 |
| SITYG_19790 | -           | 1963251 | 1963539 hypothetical protein                                                 | 95  |      | 0.0    | 0.0    | 34.9   | 0      |                 |                 |
| SITYG_19800 | -           | 1963563 | 1963899 hypothetical protein                                                 | 111 |      | 185.2  | 1635.0 | 179.3  | 0      |                 |                 |
| SITYG_19810 | -           | 1964118 | 1964430 hypothetical protein                                                 | 106 | K    | 116.3  | 410.7  | 657.0  | 6.1    | 0               |                 |
| SITYG_19820 | -           | 1964340 | 1965102 hypothetical protein                                                 | 253 | K    | 54.4   | 461.4  | 237.2  | 4.7    | 0               |                 |
| SITYG_19830 | -           | 1965102 | 1965876 HAD-superfamily hydrolase, subfamily IIB                             | 257 | R    | 139.3  | 425.9  | 246.5  | 0      |                 |                 |
| SITYG_19840 | -           | 1965989 | 1966626 putative membrane protein                                            | 800 | S    | 79.1   | 542.6  | 488.4  | 6.7    | 1               | alive in vivo   |
| SITYG_19850 | -           | 1968836 | 1969370 transcriptional regulator, TetR family                               | 177 | K    | 101.0  | 205.8  | 94.0   | 0      |                 |                 |
| SITYG_19860 | <i>rpsD</i> | 1969558 | 1970170 30S ribosomal protein S4                                             | 203 | J    | 840.5  | 215.4  | 705.6  | 0      |                 |                 |
| SITYG_19870 | -           | 1970372 | 1971005 HAD hydrolase, subfamily IA                                          | 210 | R    | 563.6  | 833.2  | 1189.8 | 0      |                 |                 |
| SITYG_19880 | -           | 1971043 | 1971316 hypothetical protein                                                 | 90  | S    | 668.6  | 724.4  | 367.8  | 0      |                 |                 |
| SITYG_19890 | <i>dnaB</i> | 1971319 | 1972672 replicative DNA helicase                                             | 450 | L    | 558.0  | 487.2  | 556.7  | 0      |                 |                 |
| SITYG_19900 | <i>rplI</i> | 1972704 | 1973157 50S ribosomal protein L9                                             | 150 | J    | 613.5  | 194.0  | 687.2  | 0      |                 |                 |
| SITYG_19910 | -           | 1973153 | 1975130 hypothetical protein                                                 | 658 | T    | 715.5  | 766.9  | 833.0  | 0      |                 |                 |
| SITYG_19920 | -           | 1975378 | 1977295 glucose inhibited division protein A                                 | 638 | D    | 1099.3 | 664.9  | 1100.1 | 0      |                 |                 |
| SITYG_19930 | -           | 1977427 | 1978549 tRNA (5-methylaminomethyl-2-thiouridylylate)-methyltransferase       | 373 | J    | 563.4  | 430.9  | 572.8  | 0      |                 |                 |
| SITYG_19940 | -           | 1978908 | 1979415 hypothetical protein                                                 | 168 | S    | 2364.5 | 390.1  | 1693.6 | 0      |                 |                 |
| SITYG_19950 | <i>sdsB</i> | 1979672 | 1980344 iron-sulphur-dependent L-serine dehydratase beta subunit             | 223 | E    | 166.7  | 523.2  | 506.1  | 3.3    | 0               |                 |
| SITYG_19960 | <i>sdsA</i> | 1980352 | 1981225 L-serine dehydratase alpha subunit                                   | 290 | E    | 123.5  | 402.7  | 80.5   | 0      |                 |                 |
| SITYG_19970 | -           | 1981452 | 1982097 putative phosphoglycolate phosphatase                                | 214 | R    | 321.6  | 647.3  | 280.2  | 0      |                 |                 |
| SITYG_19980 | -           | 1982273 | 1982870 hypothetical protein                                                 | 198 |      | 736.5  | 478.5  | 622.4  | 0      |                 |                 |
| SITYG_19990 | -           | 1983024 | 1983819 cobalt transport protein                                             | 264 | P    | 360.0  | 469.9  | 606.3  | 0      |                 |                 |
| SITYG_20000 | -           | 1983811 | 1984651 cobalt ABC transporter, ABC-binding protein                          | 279 | P    | 666.7  | 967.9  | 657.5  | 0      |                 |                 |
| SITYG_20010 | -           | 1984635 | 1985463 ABC transporter ATP-binding protein                                  | 275 | P    | 465.9  | 345.0  | 776.2  | 0      |                 |                 |
| SITYG_20020 | <i>pgsA</i> | 1985464 | 1986004 CDP-diacetyl-glycerol-glycerol-3-phosphate 3-phosphatidyltransferase | 179 | I    | 960.2  | 529.0  | 539.3  | 0      |                 |                 |
| SITYG_20030 | -           | 1986014 | 1986827 hypothetical protein                                                 | 270 | S    | 326.5  | 297.3  | 271.7  | 0      |                 |                 |
| SITYG_20040 | -           | 1986885 | 1988181 putative peptidase                                                   | 431 | R    | 428.9  | 508.7  | 402.9  | 0      |                 |                 |
| SITYG_20050 | -           | 1988180 | 1989428 putative zinc-dependent peptidase                                    | 415 | R    | 388.9  | 316.9  | 354.0  | 0      |                 |                 |
| SITYG_20060 | -           | 1989603 | 1989984 hypothetical protein                                                 | 126 | S    | 1676.7 | 519.1  | 1317.8 | 0      |                 |                 |
| SITYG_20070 | <i>recF</i> | 1989985 | 1991083 DNA replication and repair protein RecF                              | 365 | L    | 411.8  | 700.5  | 411.6  | 0      |                 |                 |
| SITYG_20080 | <i>guaB</i> | 1991913 | 1993395 inosine-5'-monophosphate dehydrogenase                               | 493 | F    | 926.5  | 860.0  | 738.6  | 0      |                 |                 |
| SITYG_20090 | <i>trpS</i> | 1993532 | 1994558 tryptophanyl-tRNA synthetase                                         | 341 | J    | 752.0  | 385.5  | 802.6  | 0      |                 |                 |
| SITYG_20100 | -           | 1994639 | 1995635 UDP-glucose 4-epimerase                                              | 331 | M    | 108.3  | 198.6  | 110.9  | 0      |                 |                 |
| SITYG_20110 | -           | 1995652 | 1996342 inose-phosphate isomerase                                            | 229 | G    | 138.3  | 318.5  | 291.1  | 0      |                 |                 |
| SITYG_20120 | -           | 1996354 | 1996894 hypothetical protein                                                 | 179 | R    | 161.3  | 488.3  | 297.5  | 0      |                 |                 |
| SITYG_20130 | -           | 1997048 | 1998671 ABC transporter, ATP-binding protein                                 | 540 | R    | 329.7  | 467.4  | 420.7  | 0      |                 |                 |
| SITYG_20140 | -           | 1998744 | 2001321 hypothetical protein                                                 | 858 | S    | 117.5  | 196.1  | 187.0  | 1      | alive in vivo   |                 |
| SITYG_20150 | -           | 2001644 | 2002394 response regulator                                                   | 249 | KT   | 453.5  | 234.4  | 562.4  | 1      | alive in vivo   |                 |
| SITYG_20160 | -           | 2002393 | 2003536 histidine kinase                                                     | 380 | T    | 424.6  | 615.2  | 702.9  | 0      |                 |                 |
| SITYG_20170 | -           | 2003735 | 2003882 hypothetical protein                                                 | 48  |      | 56.4   | 0.0    | 204.9  | 4.0    | >204.9          | 0               |
| SITYG_20180 | -           | 2004158 | 2004638 ribosomal RNA large subunit methyltransferase H                      | 159 | S    | 164.2  | 183.1  | 83.7   | 2      | alive in vivo   |                 |
| SITYG_20190 | -           | 2004841 | 2006032 putative serine protease                                             | 396 | O    | 1839.0 | 442.8  | 1543.0 | 1      | alive in vivo   |                 |
| SITYG_20200 | -           | 2006068 | 2006854 hypothetical protein                                                 | 261 | K    | 865.5  | 559.2  | 779.3  | 2      | alive in vivo   |                 |
