# Supplementary material
Source: PubMed Central journal article supplement (PMC5278170)
Supplement: IAI.00886-16_zii999091958s4.pdf [file IAI.00886-16_zii999091958s4.pdf]

# Supplemental figure S1.

## A. Gap-closing on SITYG\_16380

321 bp tandem repeat  
sequence on SITYG\_16380

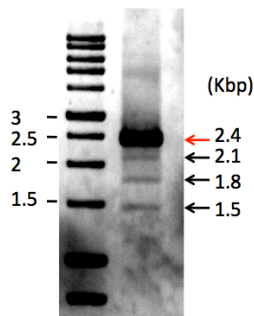

SITYG\_16380 has 6-time tandem repeats of 321 bp core unit showing collagen binding B motif, such long tandem repeats were highly problematic to close the gap between scaffolds. PCR product for the gap was obtained as 2.1 kb, followed by cloning into pUC19 vector with In-Fusion PCR cloning. The product was sequenced with MiSeq, followed by de novo assembly of partial gap region using Platanus (parameter: c-35), PRICE (parameter: identity 100 %, mpi 99 %, target 97 %).

## B. InterPro motif search analysis of SITYG\_16380

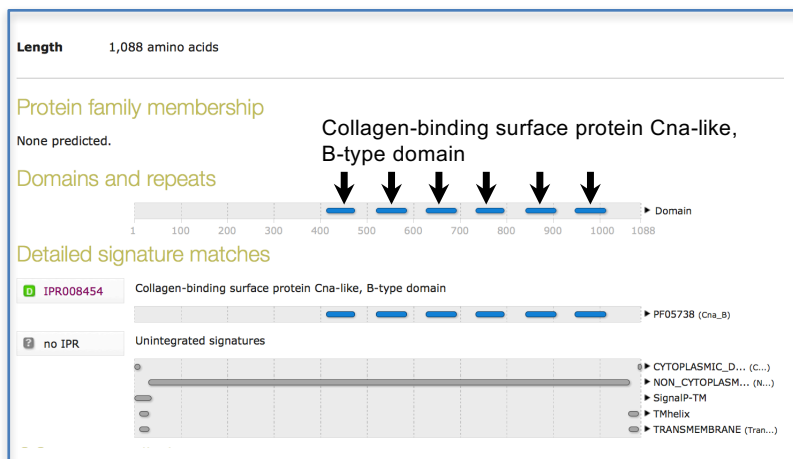

InterPro motif search suggested that SITYG\_16380 has 6-time tandem repeats of 321 bp core unit showing collagen binding B motif.
